# Supplementary material for: Late Relapse and Reinfection in HCV Patients Treated with Direct-Acting Antiviral (DAA) Drugs
Source: MDPI journal article supplement (doi:10.3390/v13061151), 2021-06-16
Supplement: s1 [file s1]

**Figure S1.** Maximum likelihood phylogenetic tree of patient 1 sequences. A substitution rate model was selected according to the Bayesian information criterion in order to build the NS5B phylogenetic tree. The HCV GT1a sequence (EF407457.1) was selected as an out-group. Sanger sequences for patient 1 samples were included and indicated as Patient\_1-T0 and Patient\_1-T1. The bar represents the genetic distance (substitution per nucleotide position). A bootstrap analysis with 5000 replicates was performed. Nodes with a bootstrap value of at least 80% are marked with an orange dot. Each sample from patient 1 is represented by a different color: Pt1\_T0 and Pt1\_T1 are depicted in light and dark blue, respectively.

**Figure S2.** Maximum likelihood phylogenetic tree of patient 2 sequences. A substitution rate model was selected according to the Bayesian information criterion in order to build the NS5B phylogenetic tree. The HCV GT1a sequence (EF407457.1) was selected as an out-group. Sanger sequences for patient 2 samples were included and indicated as Patient\_2-T0 and Patient\_2-T1. The bar represents the genetic distance (substitution per nucleotide position). A bootstrap analysis with 5000 replicates was performed. Nodes with a bootstrap value of at least 80% are marked with a violet dot. Each sample from patient 2 is represented by a different color: Pt2\_T0 and Pt2\_T1 are depicted in light and dark red, respectively.

**Figure S3** Maximum likelihood phylogenetic tree of patient 3 sequences. A substitution rate model was selected according to the Bayesian information criterion in order to build the NS5B phylogenetic tree. The HCV GT1a sequence (EF407457.1) was selected as an out-group. Sanger sequences for patient 3 samples were included and indicated as Patient\_3-T0, Patient\_3-T1 and Patient\_3-T2. The bar represents the genetic distance (substitution per nucleotide position). A bootstrap analysis with 5000 replicates was performed. Nodes with a bootstrap value of at least 80% are marked with an orange dot. Each sample from patient 3 is represented by a different color: Pt3\_T0, Pt3\_T1 and Pt3\_T2 are depicted in light green, olive green and dark olive green, respectively.

**Figure S4.** Maximum likelihood phylogenetic tree of patient 4 sequences. A substitution rate model was selected according to the Bayesian information criterion in order to build the NS5B phylogenetic tree. The HCV GT1b sequence (EU781827.1) was selected as an out-group. Sanger sequences for patient 4 samples were included and indicated as Patient\_4-T0 and Patient\_4-T1. The bar represents the genetic distance (substitution per nucleotide position). A bootstrap analysis with 5000 replicates was performed. Nodes with a bootstrap value of at least 80% are marked with an orange dot. Each sample from patient 4 is represented by a different color: Pt4\_T0 and Pt4\_T1 are depicted in light and dark grey, respectively.

**Figure S5.** Maximum likelihood phylogenetic tree of patient 5 sequences. A substitution rate model was selected according to the Bayesian information criterion in order to build the NS5B phylogenetic tree. The HCV GT4d sequence (DQ418786.1) was selected as an out-group. Reference sequences (GT1a: EF407457.1; GT1b: EU781827.1) were retrieved from GenBank. Sanger sequences for patient 5 samples were included and indicated as Patient\_5-T0 and Patient\_5-T1. The bar represents the genetic distance (substitution per nucleotide position). A bootstrap analysis with 5000 replicates was performed. Nodes with a bootstrap value of at least 80% are marked with an orange dot. Each sample from patient 5 is represented by a different color: Pt5\_T0 and Pt5\_T1 are depicted in light and dark violet, respectively.

**Figure S6.** Maximum likelihood phylogenetic tree of patient 6 sequences. A substitution rate model was selected according to the Bayesian information criterion in order to build the NS5B phylogenetic tree. The HCV GT3a sequence (X76918.1) was selected as an out-group. Sanger sequences for patient 6 samples were included and indicated as Patient\_6-T0 and Patient\_6-T1. The bar represents the genetic distance (substitution per nucleotide position). A bootstrap analysis with 5000 replicates was performed. Nodes with a bootstrap value of at least 80% are marked with an orange dot. Each sample from patient

6 is represented by a different color: Pt6\_T0 and Pt6\_T1 are depicted in light and dark brown, respectively.

**Figure S7.** Maximum likelihood phylogenetic tree of our six HCV-infected patient-derived Sanger sequences. The phylogenetic tree, constructed using the maximum likelihood method (Kimura 2-parameter model+G), is based on HCV NS5B Sanger sequences. Bootstrap values were based on 500 replicates. Bootstrap values >70% are indicated on respective branches. The HCV GT4d reference sequence (DQ418786.1) was selected as an out-group. HCV reference sequences (GT1a: EF407457.1; GT1b: EU781827.1; GT3a: X76918.1) were retrieved from GenBank. Sanger sequences of each sample from each patient were indicated as Patient\_N-T0, Patient\_N-T1 and Patient\_N-T2. The bar represents the genetic distance (substitution per nucleotide position). Each patient is represented by a different color: Pt1\_T0 and Pt1\_T1 are light and dark blue, respectively; Pt2\_T0 and Pt2\_T1 are light and dark red; Pt3\_T0, Pt3\_T1 and Pt3\_T2 are light green, olive green and dark olive green, respectively; Pt4\_T0 and Pt4\_T1 are light and dark grey, respectively; Pt5\_T0 and Pt5\_T1 are light and dark violet, respectively; Pt6\_T0 and Pt6\_T1 are light and dark brown, respectively.
