# Supplementary material for: Late Relapse and Reinfection in HCV Patients Treated with Direct-Acting Antiviral (DAA) Drugs
Source: MDPI journal article supplement (doi:10.3390/v13061151), 2021-06-16
Supplement: s1 [file s1]

**Table S6.** Frequency of substitutions in Pt6 with respect to a GT3a reference sequence (X76918.1). The relevant amino acid and nucleotide changes between T0 and T1 are written in red.

| NS5B<br>aa<br>position | Pt6                 |                      | NS5B<br>nt<br>position | T0 (3a) |        |        |        |   | Pt6     |        |        |        |        |
|------------------------|---------------------|----------------------|------------------------|---------|--------|--------|--------|---|---------|--------|--------|--------|--------|
|                        | T0 (3a)             | T1 (3a)              |                        | T0 (3a) |        |        |        |   | T1 (3a) |        |        |        |        |
|                        |                     |                      |                        | A       | C      | G      | T      | - | A       | C      | G      | T      | -      |
| 179                    | I(100,00)           | V(100,00)            | 535                    | 100,00  |        |        |        |   | 100,00  |        |        |        |        |
|                        |                     |                      | 536                    |         |        |        | 100,00 |   |         |        |        | 100,00 |        |
|                        |                     |                      | 537                    | 100,00  |        |        |        |   | 100,00  |        |        |        |        |
| 180                    | Q(100,00)           | Q(100,00)            | 538                    |         | 100,00 |        |        |   |         | 100,00 |        |        |        |
|                        |                     |                      | 539                    | 100,00  |        |        |        |   | 100,00  |        |        |        |        |
|                        |                     |                      | 540                    |         |        | 100,00 |        |   |         |        | 100,00 |        |        |
| 181                    | K(100,00)           | K(100,00)            | 541                    | 100,00  |        |        |        |   | 100,00  |        |        |        |        |
|                        |                     |                      | 542                    | 100,00  |        |        |        |   | 100,00  |        |        |        |        |
|                        |                     |                      | 543                    |         |        | 100,00 |        |   |         |        | 100,00 |        |        |
| 182                    | L(100,00)           | L(100,00)            | 544                    |         |        |        | 100,00 |   |         |        |        | 100,00 |        |
|                        |                     |                      | 545                    |         |        |        | 100,00 |   |         |        |        | 100,00 |        |
|                        |                     |                      | 546                    |         |        | 100,00 |        |   |         |        | 100,00 |        |        |
| 183                    | S(100,00)           | S(100,00)            | 547                    |         |        |        | 100,00 |   |         |        |        | 100,00 |        |
|                        |                     |                      | 548                    |         | 100,00 |        |        |   |         | 100,00 |        |        |        |
|                        |                     |                      | 549                    | 99,80   |        | 0,20   |        |   | 100,00  |        |        |        |        |
| 184                    | I(99,63)<br>T(0,37) | I(100,00)            | 550                    | 100,00  |        |        |        |   | 100,00  |        |        |        |        |
|                        |                     |                      | 551                    |         | 0,37   |        | 99,63  |   |         |        |        | 100,00 |        |
|                        |                     |                      | 552                    |         |        |        | 100,00 |   |         |        |        | 100,00 |        |
| 185                    | A(99,80)<br>T(0,20) | A(100,00)            | 553                    | 0,20    |        | 99,80  |        |   |         |        | 100,00 |        |        |
|                        |                     |                      | 554                    |         | 100,00 |        |        |   |         | 100,00 |        |        |        |
|                        |                     |                      | 555                    |         |        | 100,00 |        |   |         |        | 100,00 |        |        |
| 186                    | A(100,00)           | A(100,00)            | 556                    |         |        | 100,00 |        |   |         |        | 100,00 |        |        |
|                        |                     |                      | 557                    |         | 100,00 |        |        |   |         | 100,00 |        |        |        |
|                        |                     |                      | 558                    |         |        | 100,00 |        |   |         |        | 100,00 |        |        |
| 187                    | M(100,00)           | M(100,00)            | 559                    | 100,00  |        |        |        |   | 100,00  |        |        |        |        |
|                        |                     |                      | 560                    |         |        |        | 100,00 |   |         |        |        | 100,00 |        |
|                        |                     |                      | 561                    |         |        | 100,00 |        |   |         |        | 100,00 |        |        |
| 188                    | G(100,00)           | G(100,00)            | 562                    |         |        | 100,00 |        |   |         |        | 100,00 |        |        |
|                        |                     |                      | 563                    |         |        | 100,00 |        |   |         |        | 100,00 |        |        |
|                        |                     |                      | 564                    |         |        |        | 100,00 |   |         |        |        | 100,00 |        |
| 189                    | S(100,00)           | P(59,27)<br>S(40,73) | 565                    |         |        |        | 100,00 |   |         | 59,27  |        | 40,73  |        |
|                        |                     |                      | 566                    |         | 100,00 |        |        |   |         | 100,00 |        |        |        |
|                        |                     |                      | 567                    |         | 0,57   |        | 99,43  |   |         |        |        | 100,00 |        |
| 190                    | A(100,00)           | A(100,00)            | 568                    |         |        | 100,00 |        |   |         |        | 100,00 |        |        |
|                        |                     |                      | 569                    |         | 100,00 |        |        |   |         | 100,00 |        |        |        |
|                        |                     |                      | 570                    |         |        |        | 100,00 |   |         |        |        | 100,00 |        |
| 191                    | Y(100,00)           | Y(100,00)            | 571                    |         |        |        | 100,00 |   |         |        |        |        | 100,00 |
|                        |                     |                      | 572                    | 100,00  |        |        |        |   | 100,00  |        |        |        |        |
|                        |                     |                      | 573                    |         | 0,20   |        | 99,80  |   |         |        |        | 100,00 |        |
| 192                    | G(100,00)           | G(100,00)            | 574                    |         |        | 100,00 |        |   |         |        | 100,00 |        |        |
|                        |                     |                      | 575                    |         |        | 100,00 |        |   |         |        | 100,00 |        |        |
|                        |                     |                      | 576                    | 100,00  |        |        |        |   | 100,00  |        |        |        |        |
| 193                    | F(100,00)           | F(100,00)            | 577                    |         |        |        | 100,00 |   |         |        |        | 100,00 |        |
|                        |                     |                      | 578                    |         |        |        | 100,00 |   |         |        |        | 100,00 |        |
|                        |                     |                      | 579                    |         | 100,00 |        |        |   |         | 100,00 |        |        |        |
| 194                    | Q(100,00)           | Q(100,00)            | 580                    |         | 100,00 |        |        |   |         | 100,00 |        |        |        |
|                        |                     |                      | 581                    | 100,00  |        |        |        |   | 100,00  |        |        |        |        |
|                        |                     |                      | 582                    | 100,00  |        |        |        |   | 100,00  |        |        |        |        |
| 195                    | Y(100,00)           | Y(100,00)            | 583                    |         |        |        | 100,00 |   |         |        |        | 100,00 |        |
|                        |                     |                      | 584                    | 100,00  |        |        |        |   | 100,00  |        |        |        |        |
|                        |                     |                      | 585                    |         | 99,63  |        | 0,37   |   |         | 100,00 |        |        |        |
| 196                    | S(100,00)           | S(100,00)            | 586                    |         |        |        | 100,00 |   |         |        |        | 100,00 |        |
|                        |                     |                      | 587                    |         | 100,00 |        |        |   |         | 100,00 |        |        |        |
|                        |                     |                      | 588                    |         |        | 100,00 |        |   |         |        | 100,00 |        |        |

|     |                     |                     |     |        |        |        |        |        |        |        |        |
|-----|---------------------|---------------------|-----|--------|--------|--------|--------|--------|--------|--------|--------|
| 197 | P(100,00)           | P(100,00)           | 589 |        | 100,00 |        |        |        | 100,00 |        |        |
|     |                     |                     | 590 |        | 100,00 |        |        |        | 100,00 |        |        |
|     |                     |                     | 591 |        |        |        | 100,00 |        |        |        | 100,00 |
| 198 | Q(100,00)           | Q(100,00)           | 592 |        | 100,00 |        |        |        | 100,00 |        |        |
|     |                     |                     | 593 | 100,00 |        |        |        | 100,00 |        |        |        |
|     |                     |                     | 594 | 100,00 |        |        |        | 100,00 |        |        |        |
| 199 | Q(100,00)           | Q(100,00)           | 595 |        | 100,00 |        |        |        | 100,00 |        |        |
|     |                     |                     | 596 | 100,00 |        |        |        | 100,00 |        |        |        |
|     |                     |                     | 597 |        |        | 100,00 |        |        |        | 100,00 |        |
| 200 | R(100,00)           | R(100,00)           | 598 |        | 100,00 |        |        |        | 100,00 |        |        |
|     |                     |                     | 599 |        |        | 100,00 |        |        |        | 100,00 |        |
|     |                     |                     | 600 |        |        | 100,00 |        |        |        | 100,00 |        |
| 201 | V(100,00)           | V(100,00)           | 601 |        |        | 100,00 |        |        |        | 100,00 |        |
|     |                     |                     | 602 |        |        |        | 100,00 |        |        |        | 100,00 |
|     |                     |                     | 603 |        | 100,00 |        |        |        | 100,00 |        |        |
| 202 | E(100,00)           | E(100,00)           | 604 |        |        | 100,00 |        |        |        | 100,00 |        |
|     |                     |                     | 605 | 100,00 |        |        |        | 100,00 |        |        |        |
|     |                     |                     | 606 | 99,67  |        | 0,33   |        | 100,00 |        |        |        |
| 203 | R(100,00)           | R(100,00)           | 607 |        | 100,00 |        |        |        | 100,00 |        |        |
|     |                     |                     | 608 |        |        | 100,00 |        |        |        | 100,00 |        |
|     |                     |                     | 609 |        |        |        | 100,00 |        |        |        | 100,00 |
| 204 | L(100,00)           | L(100,00)           | 610 |        | 100,00 |        |        |        | 100,00 |        |        |
|     |                     |                     | 611 |        |        |        | 100,00 |        |        |        | 100,00 |
|     |                     |                     | 612 | 0,29   |        | 99,71  |        |        |        | 100,00 |        |
| 205 | L(100,00)           | L(100,00)           | 613 |        | 100,00 |        |        |        | 100,00 |        |        |
|     |                     |                     | 614 |        |        |        | 100,00 |        |        |        | 100,00 |
|     |                     |                     | 615 |        |        | 100,00 |        | 1,34   |        | 98,66  |        |
| 206 | Q(1,63)<br>K(98,37) | E(1,83)<br>K(98,17) | 616 | 98,37  | 1,63   |        |        | 98,17  |        | 1,83   |        |
|     |                     |                     | 617 | 100,00 |        |        |        | 100,00 |        |        |        |
|     |                     |                     | 618 |        |        | 100,00 |        |        |        | 100,00 |        |
| 207 | M(100,00)           | M(100,00)           | 619 | 100,00 |        |        |        | 100,00 |        |        |        |
|     |                     |                     | 620 |        |        |        | 100,00 |        |        |        | 100,00 |
|     |                     |                     | 621 |        |        | 100,00 |        |        |        | 100,00 |        |
| 208 | W(100,00)           | W(100,00)           | 622 |        |        |        | 100,00 |        |        |        | 100,00 |
|     |                     |                     | 623 |        |        | 100,00 |        |        |        | 100,00 |        |
|     |                     |                     | 624 |        |        | 100,00 |        |        |        | 100,00 |        |
| 209 | T(100,00)           | T(100,00)           | 625 | 100,00 |        |        |        | 100,00 |        |        |        |
|     |                     |                     | 626 |        | 100,00 |        |        |        | 100,00 |        |        |
|     |                     |                     | 627 |        | 100,00 |        |        |        | 100,00 |        |        |
| 210 | S(100,00)           | S(100,00)           | 628 |        |        |        | 100,00 |        |        |        | 100,00 |
|     |                     |                     | 629 |        | 100,00 |        |        |        | 100,00 |        |        |
|     |                     |                     | 630 | 100,00 |        |        |        | 100,00 |        |        |        |
| 211 | K(100,00)           | K(100,00)           | 631 | 100,00 |        |        |        | 100,00 |        |        |        |
|     |                     |                     | 632 | 100,00 |        |        |        | 100,00 |        |        |        |
|     |                     |                     | 633 |        |        | 100,00 |        |        |        | 100,00 |        |
| 212 | K(100,00)           | K(100,00)           | 634 | 100,00 |        |        |        | 100,00 |        |        |        |
|     |                     |                     | 635 | 100,00 |        |        |        | 100,00 |        |        |        |
|     |                     |                     | 636 | 100,00 |        |        |        | 100,00 |        |        |        |
| 213 | T(100,00)           | T(100,00)           | 637 | 100,00 |        |        |        | 100,00 |        |        |        |
|     |                     |                     | 638 |        | 100,00 |        |        |        | 100,00 |        |        |
|     |                     |                     | 639 |        | 100,00 |        |        |        | 100,00 |        |        |
| 214 | P(100,00)           | P(100,00)           | 640 |        | 100,00 |        |        |        | 100,00 |        |        |
|     |                     |                     | 641 |        | 100,00 |        |        |        | 100,00 |        |        |
|     |                     |                     | 642 |        | 100,00 |        |        |        | 100,00 |        |        |
| 215 | L(100,00)           | L(100,00)           | 643 |        |        |        | 100,00 |        |        |        | 100,00 |
|     |                     |                     | 644 |        |        |        | 100,00 |        |        |        | 100,00 |
|     |                     |                     | 645 |        |        | 100,00 |        |        |        | 100,00 |        |
| 216 | G(100,00)           | G(100,00)           | 646 |        |        | 100,00 |        |        |        | 100,00 |        |
|     |                     |                     | 647 |        |        | 100,00 |        |        |        | 100,00 |        |
|     |                     |                     | 648 |        |        | 100,00 |        |        |        | 100,00 |        |
| 217 | F(100,00)           | F(100,00)           | 649 |        |        |        | 100,00 |        |        |        | 100,00 |
|     |                     |                     | 650 |        |        |        | 100,00 |        |        |        | 100,00 |

|     |           |           |     |        |        |        |        |        |        |        |        |
|-----|-----------|-----------|-----|--------|--------|--------|--------|--------|--------|--------|--------|
|     |           |           | 651 |        | 100,00 |        |        |        | 100,00 |        |        |
| 218 | S(100,00) | S(100,00) | 652 |        |        |        | 100,00 |        |        | 100,00 |        |
|     |           |           | 653 |        | 100,00 |        |        |        | 100,00 |        |        |
|     |           |           | 654 | 0,24   |        | 99,76  |        |        |        | 100,00 |        |
|     |           |           | 655 |        |        |        | 100,00 |        |        |        | 100,00 |
| 219 | Y(100,00) | Y(100,00) | 656 | 100,00 |        |        |        | 100,00 |        |        |        |
|     |           |           | 657 |        |        |        | 100,00 |        |        |        | 100,00 |
|     |           |           | 658 |        |        | 100,00 |        |        |        | 100,00 |        |
| 220 | D(100,00) | D(100,00) | 659 | 100,00 |        |        |        | 100,00 |        |        |        |
|     |           |           | 660 |        | 100,00 |        |        |        | 100,00 |        |        |
|     |           |           | 661 | 100,00 |        |        |        | 100,00 |        |        |        |
| 221 | T(100,00) | T(100,00) | 662 |        | 100,00 |        |        |        | 100,00 |        |        |
|     |           |           | 663 |        | 100,00 |        |        |        | 100,00 |        |        |
|     |           |           | 664 |        | 100,00 |        |        |        | 100,00 |        |        |
| 222 | R(100,00) | R(100,00) | 665 |        |        | 100,00 |        |        |        | 100,00 |        |
|     |           |           | 666 |        | 100,00 |        |        |        | 100,00 |        |        |
|     |           |           | 667 |        |        |        | 100,00 |        |        |        | 100,00 |
| 223 | C(100,00) | C(100,00) | 668 |        |        | 100,00 |        |        |        | 100,00 |        |
|     |           |           | 669 |        | 100,00 |        |        |        | 100,00 |        |        |
|     |           |           | 670 |        |        |        | 100,00 |        |        |        | 100,00 |
| 224 | F(100,00) | F(100,00) | 671 |        |        |        | 100,00 |        |        |        | 100,00 |
|     |           |           | 672 |        |        |        | 100,00 |        |        |        | 100,00 |
|     |           |           | 673 |        |        | 100,00 |        |        |        | 100,00 |        |
| 225 | D(100,00) | D(100,00) | 674 | 100,00 |        |        |        | 100,00 |        |        |        |
|     |           |           | 675 |        | 100,00 |        |        |        | 100,00 |        |        |
|     |           |           | 676 |        |        |        | 100,00 |        |        |        | 100,00 |
| 226 | S(100,00) | S(100,00) | 677 |        | 100,00 |        |        |        | 100,00 |        |        |
|     |           |           | 678 | 99,43  |        | 0,57   |        | 100,00 |        |        |        |
|     |           |           | 679 | 100,00 |        |        |        | 100,00 |        |        |        |
| 227 | T(100,00) | T(100,00) | 680 |        | 100,00 |        |        |        | 100,00 |        |        |
|     |           |           | 681 |        | 0,20   |        | 99,80  |        |        |        | 100,00 |
|     |           |           | 682 |        |        | 100,00 |        |        |        | 100,00 |        |
| 228 | V(100,00) | V(100,00) | 683 |        |        |        | 100,00 |        |        |        | 100,00 |
|     |           |           | 684 |        | 99,76  |        | 0,24   |        | 100,00 |        |        |
|     |           |           | 685 | 100,00 |        |        |        | 100,00 |        |        |        |
| 229 | T(100,00) | T(100,00) | 686 |        | 100,00 |        |        |        | 100,00 |        |        |
|     |           |           | 687 |        | 3,05   |        | 96,95  |        |        |        | 100,00 |
|     |           |           | 688 |        |        | 100,00 |        |        |        | 100,00 |        |
| 230 | E(100,00) | E(100,00) | 689 | 100,00 |        |        |        | 100,00 |        |        |        |
|     |           |           | 690 | 100,00 |        |        |        | 100,00 |        |        |        |
|     |           |           | 691 |        | 100,00 |        |        |        | 100,00 |        |        |
| 231 | Q(100,00) | Q(100,00) | 692 | 100,00 |        |        |        |        |        |        |        |
|     |           |           | 693 |        |        | 100,00 |        |        |        | 100,00 |        |
|     |           |           | 694 |        |        | 100,00 |        |        |        | 100,00 |        |
| 232 | D(100,00) | D(100,00) | 695 | 100,00 |        |        |        |        | 100,00 |        |        |
|     |           |           | 696 |        | 100,00 |        |        |        | 100,00 |        |        |
|     |           |           | 697 | 100,00 |        |        |        | 100,00 |        |        |        |
| 233 | I(100,00) | I(100,00) | 698 |        |        |        | 100,00 |        |        |        | 100,00 |
|     |           |           | 699 |        | 100,00 |        |        |        | 100,00 |        |        |
|     |           |           | 700 | 100,00 |        |        |        | 100,00 |        |        |        |
| 234 | R(100,00) | R(100,00) | 701 |        |        | 100,00 |        |        |        | 100,00 |        |
|     |           |           | 702 |        |        | 100,00 |        |        |        | 100,00 |        |
|     |           |           | 703 |        |        | 100,00 |        |        |        | 100,00 |        |
| 235 | V(100,00) | V(100,00) | 704 |        |        |        | 100,00 |        |        |        | 100,00 |
|     |           |           | 705 | 0,45   |        | 99,55  |        |        |        | 100,00 |        |
|     |           |           | 706 |        |        | 100,00 |        |        |        | 100,00 |        |
| 236 | E(100,00) | E(100,00) | 707 | 100,00 |        |        |        | 100,00 |        |        |        |
|     |           |           | 708 | 100,00 |        |        |        | 100,00 |        |        |        |
|     |           |           | 709 |        |        | 100,00 |        |        |        | 100,00 |        |
| 237 | E(100,00) | E(100,00) | 710 | 100,00 |        |        |        |        |        |        |        |
|     |           |           | 711 |        |        | 100,00 |        |        |        | 100,00 |        |
| 238 | E(100,00) | E(100,00) | 712 |        |        | 100,00 |        |        |        | 100,00 |        |

|     |                     |           |     |        |        |        |        |        |        |        |        |
|-----|---------------------|-----------|-----|--------|--------|--------|--------|--------|--------|--------|--------|
| 239 | I(100,00)           | I(100,00) | 713 | 100,00 |        |        |        | 100,00 |        |        |        |
|     |                     |           | 714 | 99,80  |        | 0,20   |        | 100,00 |        |        |        |
|     |                     |           | 715 | 100,00 |        |        |        | 100,00 |        |        |        |
|     |                     |           | 716 |        |        |        | 100,00 |        |        |        | 100,00 |
|     |                     |           | 717 | 100,00 |        |        |        | 100,00 |        |        |        |
| 240 | Y(100,00)           | Y(100,00) | 718 |        |        |        | 100,00 |        |        |        | 100,00 |
|     |                     |           | 719 | 100,00 |        |        |        | 100,00 |        |        |        |
|     |                     |           | 720 |        | 99,67  |        | 0,33   |        | 100,00 |        |        |
| 241 | Q(100,00)           | Q(100,00) | 721 |        | 100,00 |        |        |        | 100,00 |        |        |
|     |                     |           | 722 | 100,00 |        |        |        | 100,00 |        |        |        |
|     |                     |           | 723 | 100,00 |        |        |        | 100,00 |        |        |        |
| 242 | C(100,00)           | C(100,00) | 724 |        |        |        | 100,00 |        |        |        | 100,00 |
|     |                     |           | 725 |        |        | 100,00 |        |        | 100,00 |        |        |
|     |                     |           | 726 |        | 99,63  |        | 0,37   |        | 86,94  |        | 13,06  |
| 243 | C(100,00)           | C(100,00) | 727 |        |        |        | 100,00 |        |        |        | 100,00 |
|     |                     |           | 728 |        |        | 100,00 |        |        | 100,00 |        |        |
|     |                     |           | 729 |        | 99,55  |        | 0,45   |        | 96,25  |        | 3,75   |
| 244 | N(99,59)<br>D(0,41) | N(100,00) | 730 | 99,59  |        | 0,41   |        | 100,00 |        |        |        |
|     |                     |           | 731 | 100,00 |        |        |        | 100,00 |        |        |        |
|     |                     |           | 732 |        | 99,76  |        | 0,24   |        | 100,00 |        |        |
| 245 | L(100,00)           | L(100,00) | 733 |        | 100,00 |        |        |        | 100,00 |        |        |
|     |                     |           | 734 |        |        |        | 100,00 |        |        |        | 100,00 |
|     |                     |           | 735 |        | 0,20   |        | 99,80  |        |        |        | 100,00 |
| 246 | E(100,00)           | E(100,00) | 736 |        |        | 100,00 |        |        |        | 100,00 |        |
|     |                     |           | 737 | 100,00 |        |        |        | 100,00 |        |        |        |
|     |                     |           | 738 | 99,59  |        | 0,41   |        | 100,00 |        |        |        |
| 247 | P(100,00)           | P(100,00) | 739 |        | 100,00 |        |        |        | 100,00 |        |        |
|     |                     |           | 740 |        | 100,00 |        |        |        | 100,00 |        |        |
|     |                     |           | 741 |        |        | 100,00 |        |        |        | 100,00 |        |
| 248 | E(100,00)           | E(100,00) | 742 |        |        | 100,00 |        |        |        | 100,00 |        |
|     |                     |           | 743 | 100,00 |        |        |        | 100,00 |        |        |        |
|     |                     |           | 744 |        |        | 100,00 |        |        |        | 100,00 |        |
| 249 | A(100,00)           | A(100,00) | 745 |        |        | 100,00 |        |        |        | 100,00 |        |
|     |                     |           | 746 |        | 100,00 |        |        |        | 100,00 |        |        |
|     |                     |           | 747 |        | 100,00 |        |        |        | 100,00 |        |        |
| 250 | R(100,00)           | R(100,00) | 748 | 100,00 |        |        |        | 100,00 |        |        |        |
|     |                     |           | 749 |        |        | 100,00 |        |        |        | 100,00 |        |
|     |                     |           | 750 |        |        | 100,00 |        |        |        | 100,00 |        |
| 251 | K(100,00)           | K(100,00) | 751 | 100,00 |        |        |        | 100,00 |        |        |        |
|     |                     |           | 752 | 100,00 |        |        |        | 100,00 |        |        |        |
|     |                     |           | 753 |        |        | 100,00 |        |        |        | 100,00 |        |
| 252 | V(100,00)           | V(100,00) | 754 |        |        | 100,00 |        |        |        | 100,00 |        |
|     |                     |           | 755 |        |        |        | 100,00 |        |        |        | 100,00 |
|     |                     |           | 756 | 3,05   |        | 96,95  |        |        |        | 100,00 |        |
| 253 | I(100,00)           | I(100,00) | 757 | 100,00 |        |        |        | 100,00 |        |        |        |
|     |                     |           | 758 |        |        |        | 100,00 |        |        |        | 100,00 |
|     |                     |           | 759 |        | 30,58  |        | 69,42  |        | 97,98  |        | 2,02   |
| 254 | S(100,00)           | S(100,00) | 760 |        |        |        | 100,00 |        |        |        | 100,00 |
|     |                     |           | 761 |        | 100,00 |        |        |        | 100,00 |        |        |
|     |                     |           | 762 |        | 100,00 |        |        |        | 100,00 |        |        |
| 255 | S(100,00)           | S(100,00) | 763 |        |        |        | 100,00 |        |        |        | 100,00 |
|     |                     |           | 764 |        | 100,00 |        |        |        | 100,00 |        |        |
|     |                     |           | 765 |        | 100,00 |        |        |        | 100,00 |        |        |
| 256 | L(100,00)           | L(100,00) | 766 |        | 100,00 |        |        |        | 100,00 |        |        |
|     |                     |           | 767 |        |        |        | 100,00 |        |        |        | 100,00 |
|     |                     |           | 768 |        | 100,00 |        |        |        | 100,00 |        |        |
| 257 | T(100,00)           | T(100,00) | 769 | 100,00 |        |        |        | 100,00 |        |        |        |
|     |                     |           | 770 |        | 100,00 |        |        |        | 100,00 |        |        |
|     |                     |           | 771 | 0,20   |        | 99,80  |        |        |        | 100,00 |        |
| 258 | E(100,00)           | E(100,00) | 772 |        |        | 100,00 |        |        |        | 100,00 |        |
|     |                     |           | 773 | 100,00 |        |        |        | 100,00 |        |        |        |
|     |                     |           | 774 |        |        | 100,00 |        |        |        | 100,00 |        |

|     |           |           |     |        |        |        |        |        |        |        |        |        |
|-----|-----------|-----------|-----|--------|--------|--------|--------|--------|--------|--------|--------|--------|
| 259 | R(100,00) | R(100,00) | 775 |        | 100,00 |        |        |        |        |        |        |        |
|     |           |           | 776 |        |        | 100,00 |        |        |        | 100,00 |        |        |
|     |           |           | 777 |        |        | 100,00 |        |        |        | 100,00 |        |        |
| 260 | L(100,00) | L(100,00) | 778 |        | 100,00 |        |        |        |        | 100,00 |        |        |
|     |           |           | 779 |        |        |        | 100,00 |        |        |        | 100,00 |        |
|     |           |           | 780 |        |        |        | 100,00 |        |        |        | 100,00 |        |
| 261 | Y(100,00) | Y(100,00) | 781 |        |        |        | 100,00 |        |        |        |        | 100,00 |
|     |           |           | 782 | 100,00 |        |        |        | 100,00 |        |        |        |        |
|     |           |           | 783 |        | 100,00 |        |        |        | 100,00 |        |        |        |
| 262 | C(100,00) | C(100,00) | 784 |        |        |        | 100,00 |        |        |        | 100,00 |        |
|     |           |           | 785 |        |        | 100,00 |        |        |        |        |        | 100,00 |
|     |           |           | 786 |        |        |        | 100,00 |        |        |        |        |        |
| 263 | G(100,00) | G(100,00) | 787 |        |        | 100,00 |        |        |        |        | 100,00 |        |
|     |           |           | 788 |        |        | 100,00 |        |        |        |        | 100,00 |        |
|     |           |           | 789 | 100,00 |        |        |        | 100,00 |        |        |        |        |
| 264 | G(100,00) | G(100,00) | 790 |        |        | 100,00 |        |        |        |        | 100,00 |        |
|     |           |           | 791 |        |        | 100,00 |        |        |        |        | 100,00 |        |
|     |           |           | 792 |        |        |        | 100,00 |        |        |        |        |        |
| 265 | P(100,00) | P(100,00) | 793 |        | 100,00 |        |        |        |        | 100,00 |        |        |
|     |           |           | 794 |        | 100,00 |        |        |        |        | 100,00 |        |        |
|     |           |           | 795 |        |        |        | 100,00 |        |        |        |        | 100,00 |
| 266 | M(100,00) | M(100,00) | 796 | 100,00 |        |        |        | 100,00 |        |        |        |        |
|     |           |           | 797 |        |        |        | 100,00 |        |        |        |        | 100,00 |
|     |           |           | 798 |        |        | 100,00 |        |        |        |        |        |        |
| 267 | F(100,00) | F(100,00) | 799 |        |        |        | 100,00 |        |        |        |        | 100,00 |
|     |           |           | 800 |        |        |        | 100,00 |        |        |        |        | 100,00 |
|     |           |           | 801 |        | 100,00 |        |        |        | 100,00 |        |        |        |
| 268 | N(100,00) | N(100,00) | 802 | 100,00 |        |        |        | 100,00 |        |        |        |        |
|     |           |           | 803 | 100,00 |        |        |        | 100,00 |        |        |        |        |
|     |           |           | 804 |        | 99,47  |        | 0,53   |        | 100,00 |        |        |        |
| 269 | S(100,00) | S(100,00) | 805 | 100,00 |        |        |        | 100,00 |        |        |        |        |
|     |           |           | 806 |        |        | 100,00 |        |        |        |        | 100,00 |        |
|     |           |           | 807 |        | 100,00 |        |        |        | 100,00 |        |        |        |
| 270 | K(100,00) | K(100,00) | 808 | 100,00 |        |        |        | 100,00 |        |        |        |        |
|     |           |           | 809 | 100,00 |        |        |        | 100,00 |        |        |        |        |
|     |           |           | 810 |        |        | 100,00 |        |        |        |        | 100,00 |        |
| 271 | G(100,00) | G(100,00) | 811 |        |        | 100,00 |        |        |        |        | 100,00 |        |
|     |           |           | 812 |        |        | 100,00 |        |        |        |        | 100,00 |        |
|     |           |           | 813 |        |        | 100,00 |        |        |        |        | 100,00 |        |
| 272 | A(100,00) | A(100,00) | 814 |        |        | 100,00 |        |        |        |        |        | 100,00 |
|     |           |           | 815 |        | 100,00 |        |        |        | 100,00 |        |        |        |
|     |           |           | 816 |        | 99,71  |        | 0,29   |        | 100,00 |        |        |        |
| 273 | Q(100,00) | Q(100,00) | 817 |        | 100,00 |        |        |        |        | 100,00 |        |        |
|     |           |           | 818 | 100,00 |        |        |        | 100,00 |        |        |        |        |
|     |           |           | 819 |        |        | 100,00 |        |        |        |        | 100,00 |        |
| 274 | C(100,00) | C(100,00) | 820 |        |        |        | 100,00 |        |        |        |        | 100,00 |
|     |           |           | 821 |        |        | 100,00 |        |        |        |        |        |        |
|     |           |           | 822 |        | 100,00 |        |        |        | 100,00 |        |        |        |
| 275 | G(100,00) | G(100,00) | 823 |        |        | 100,00 |        |        |        |        | 100,00 |        |
|     |           |           | 824 |        |        | 100,00 |        |        |        |        | 100,00 |        |
|     |           |           | 825 |        |        |        | 100,00 |        |        |        |        | 100,00 |
| 276 | Y(100,00) | Y(100,00) | 826 |        |        |        | 100,00 |        |        |        |        | 100,00 |
|     |           |           | 827 | 100,00 |        |        |        | 100,00 |        |        |        |        |
|     |           |           | 828 |        | 0,20   |        | 99,80  |        |        |        |        | 100,00 |
| 277 | R(100,00) | R(100,00) | 829 |        | 100,00 |        |        |        |        | 100,00 |        |        |
|     |           |           | 830 |        |        | 100,00 |        |        |        |        | 100,00 |        |
|     |           |           | 831 |        | 100,00 |        |        |        |        | 100,00 |        |        |
| 278 | R(100,00) | R(100,00) | 832 |        | 100,00 |        |        |        |        | 100,00 |        |        |
|     |           |           | 833 |        |        | 100,00 |        |        |        |        | 100,00 |        |
|     |           |           | 834 |        | 100,00 |        |        |        |        | 100,00 |        |        |
| 279 | C(100,00) | C(100,00) | 835 |        |        |        | 100,00 |        |        |        |        | 100,00 |
|     |           |           | 836 |        |        | 100,00 |        |        |        | 100,00 |        |        |

|     |           |           |     |        |        |        |        |        |        |        |      |
|-----|-----------|-----------|-----|--------|--------|--------|--------|--------|--------|--------|------|
|     |           |           | 837 |        | 100,00 |        |        |        | 100,00 |        |      |
|     |           |           | 838 |        | 100,00 |        |        |        | 100,00 |        |      |
| 280 | R(100,00) | R(100,00) | 839 |        |        | 100,00 |        |        | 100,00 |        |      |
|     |           |           | 840 |        |        |        | 100,00 |        |        | 100,00 |      |
|     |           |           | 841 |        |        | 100,00 |        |        | 100,00 |        |      |
| 281 | A(100,00) | A(100,00) | 842 |        | 100,00 |        |        |        | 100,00 |        |      |
|     |           |           | 843 |        | 98,90  |        | 1,10   |        | 100,00 |        |      |
|     |           |           | 844 | 100,00 |        |        |        | 100,00 |        |        |      |
| 282 | S(100,00) | S(100,00) | 845 |        |        | 100,00 |        |        | 100,00 |        |      |
|     |           |           | 846 |        |        |        | 100,00 |        |        | 100,00 |      |
|     |           |           | 847 |        |        | 100,00 |        |        | 100,00 |        |      |
| 283 | G(100,00) | G(100,00) | 848 |        |        | 100,00 |        |        | 100,00 |        |      |
|     |           |           | 849 | 99,47  |        |        | 0,53   | 100,00 |        |        |      |
|     |           |           | 850 |        |        | 100,00 |        |        | 100,00 |        |      |
| 284 | V(100,00) | V(100,00) | 851 |        |        |        | 100,00 |        |        | 100,00 |      |
|     |           |           | 852 |        |        |        | 100,00 |        |        | 100,00 |      |
|     |           |           | 853 |        |        |        | 100,00 |        |        | 100,00 |      |
| 285 | L(100,00) | L(100,00) | 854 |        |        |        | 100,00 |        |        | 100,00 |      |
|     |           |           | 855 |        |        | 100,00 |        |        | 100,00 |        |      |
|     |           |           | 856 |        | 100,00 |        |        |        | 100,00 |        |      |
| 286 | P(100,00) | P(100,00) | 857 |        | 100,00 |        |        |        | 100,00 |        |      |
|     |           |           | 858 |        |        |        | 100,00 |        |        | 100,00 |      |
|     |           |           | 859 | 100,00 |        |        |        | 100,00 |        |        |      |
| 287 | T(100,00) | T(100,00) | 860 |        | 100,00 |        |        |        | 100,00 |        |      |
|     |           |           | 861 |        | 99,27  |        | 0,73   |        | 97,98  |        | 2,02 |
|     |           |           | 862 | 100,00 |        |        |        | 100,00 |        |        |      |
| 288 | S(100,00) | S(100,00) | 863 |        |        | 100,00 |        |        | 100,00 |        |      |
|     |           |           | 864 |        | 100,00 |        |        |        | 100,00 |        |      |
|     |           |           | 865 |        |        |        | 100,00 |        |        | 100,00 |      |
| 289 | F(100,00) | F(100,00) | 866 |        |        |        | 100,00 |        |        | 100,00 |      |
|     |           |           | 867 |        | 100,00 |        |        |        | 100,00 |        |      |
|     |           |           | 868 |        |        | 100,00 |        |        | 100,00 |        |      |
| 290 | G(100,00) | G(100,00) | 869 |        |        | 100,00 |        |        | 100,00 |        |      |
|     |           |           | 870 |        | 99,76  |        | 0,24   |        | 100,00 |        |      |
|     |           |           | 871 | 100,00 |        |        |        | 100,00 |        |        |      |
| 291 | N(100,00) | N(100,00) | 872 | 100,00 |        |        |        | 100,00 |        |        |      |
|     |           |           | 873 |        | 99,71  |        | 0,29   |        | 100,00 |        |      |
|     |           |           | 874 | 100,00 |        |        |        | 100,00 |        |        |      |
| 292 | T(100,00) | T(100,00) | 875 |        | 100,00 |        |        |        | 100,00 |        |      |
|     |           |           | 876 | 99,55  |        | 0,45   |        | 100,00 |        |        |      |
|     |           |           | 877 | 100,00 |        |        |        | 100,00 |        |        |      |
| 293 | I(100,00) | I(100,00) | 878 |        |        |        | 100,00 |        |        | 100,00 |      |
|     |           |           | 879 |        | 100,00 |        |        |        | 100,00 |        |      |
|     |           |           | 880 | 100,00 |        |        |        | 100,00 |        |        |      |
| 294 | T(100,00) | T(100,00) | 881 |        | 100,00 |        |        |        | 100,00 |        |      |
|     |           |           | 882 |        |        |        | 100,00 |        |        | 100,00 |      |
|     |           |           | 883 |        |        |        | 100,00 |        |        | 100,00 |      |
| 295 | C(100,00) | C(100,00) | 884 |        |        | 100,00 |        |        | 100,00 |        |      |
|     |           |           | 885 |        | 0,29   |        | 99,71  |        |        | 100,00 |      |
|     |           |           | 886 |        |        |        | 100,00 |        |        | 100,00 |      |
| 296 | Y(100,00) | Y(100,00) | 887 | 100,00 |        |        |        | 100,00 |        |        |      |
|     |           |           | 888 |        | 100,00 |        |        |        | 100,00 |        |      |
|     |           |           | 889 | 100,00 |        |        |        | 100,00 |        |        |      |
| 297 | I(100,00) | I(100,00) | 890 |        |        |        | 100,00 |        |        | 100,00 |      |
|     |           |           | 891 |        | 100,00 |        |        |        | 100,00 |        |      |
|     |           |           | 892 | 100,00 |        |        |        | 100,00 |        |        |      |
| 298 | K(100,00) | K(100,00) | 893 | 100,00 |        |        |        | 100,00 |        |        |      |
|     |           |           | 894 |        |        | 100,00 |        |        | 100,00 |        |      |
|     |           |           | 895 |        |        | 100,00 |        |        | 100,00 |        |      |
| 299 | A(100,00) | A(100,00) | 896 |        | 100,00 |        |        |        | 100,00 |        |      |
|     |           |           | 897 |        | 100,00 |        |        |        | 100,00 |        |      |
| 300 | T(100,00) | T(100,00) | 898 | 100,00 |        |        |        | 100,00 |        |        |      |

|     |                     |                      |     |        |        |        |        |        |        |        |        |
|-----|---------------------|----------------------|-----|--------|--------|--------|--------|--------|--------|--------|--------|
| 301 | A(100,00)           | A(100,00)            | 899 |        | 100,00 |        |        |        | 100,00 |        |        |
|     |                     |                      | 900 | 99,67  |        | 0,33   |        | 100,00 |        |        |        |
|     |                     |                      | 901 |        |        | 100,00 |        |        | 100,00 |        |        |
|     |                     |                      | 902 |        | 100,00 |        |        |        | 100,00 |        |        |
| 302 | A(100,00)           | A(100,00)            | 903 |        |        | 99,76  | 0,24   |        |        | 100,00 |        |
|     |                     |                      | 904 |        |        | 100,00 |        |        | 100,00 |        |        |
|     |                     |                      | 905 |        | 100,00 |        |        |        | 100,00 |        |        |
|     |                     |                      | 906 |        |        |        | 100,00 |        |        |        | 100,00 |
| 303 | A(100,00)           | A(100,00)            | 907 |        |        | 100,00 |        |        | 100,00 |        |        |
|     |                     |                      | 908 |        | 100,00 |        |        |        | 100,00 |        |        |
|     |                     |                      | 909 | 0,49   |        | 99,51  |        |        |        | 100,00 |        |
|     |                     |                      | 910 |        | 100,00 |        |        | 100,00 |        |        |        |
| 304 | R(0,29)<br>K(99,71) | R(89,24)<br>K(10,76) | 911 |        | 99,71  | 0,29   |        | 10,76  |        | 89,24  |        |
|     |                     |                      | 912 |        |        | 100,00 |        |        |        | 100,00 |        |
|     |                     |                      | 913 |        |        | 100,00 |        |        |        | 100,00 |        |
|     |                     |                      | 914 |        | 100,00 |        |        |        | 100,00 |        |        |
| 305 | A(100,00)           | A(100,00)            | 915 |        | 99,55  |        | 0,45   |        | 100,00 |        |        |
|     |                     |                      | 916 |        |        | 100,00 |        |        |        | 100,00 |        |
|     |                     |                      | 917 |        | 100,00 |        |        |        | 100,00 |        |        |
|     |                     |                      | 918 |        |        |        | 100,00 |        |        |        | 100,00 |
| 307 | G(100,00)           | G(100,00)            | 919 |        |        | 100,00 |        |        |        | 100,00 |        |
|     |                     |                      | 920 |        |        | 100,00 |        |        |        | 100,00 |        |
|     |                     |                      | 921 |        |        |        | 100,00 |        |        |        | 100,00 |
|     |                     |                      | 922 |        | 100,00 |        |        |        | 100,00 |        |        |
| 308 | L(100,00)           | L(100,00)            | 923 |        |        |        | 100,00 |        |        |        | 100,00 |
|     |                     |                      | 924 |        | 100,00 |        |        |        | 100,00 |        |        |
|     |                     |                      | 925 |        | 100,00 |        |        |        | 100,00 |        |        |
|     |                     |                      | 926 |        |        | 100,00 |        |        |        | 100,00 |        |
| 309 | R(100,00)           | R(100,00)            | 927 |        |        | 100,00 |        |        |        | 100,00 |        |
|     |                     |                      | 928 | 100,00 |        |        |        | 100,00 |        |        |        |
|     |                     |                      | 929 | 100,00 |        |        |        | 100,00 |        |        |        |
|     |                     |                      | 930 |        | 100,00 |        |        |        | 100,00 |        |        |
| 311 | P(100,00)           | P(100,00)            | 931 |        | 100,00 |        |        |        | 100,00 |        |        |
|     |                     |                      | 932 |        | 100,00 |        |        |        | 100,00 |        |        |
|     |                     |                      | 933 | 35,87  |        | 64,13  |        | 85,30  |        | 14,70  |        |
|     |                     |                      | 934 |        |        | 100,00 |        |        |        | 100,00 |        |
| 312 | D(100,00)           | D(100,00)            | 935 | 100,00 |        |        |        | 100,00 |        |        |        |
|     |                     |                      | 936 |        | 100,00 |        |        |        | 100,00 |        |        |
|     |                     |                      | 937 |        |        |        | 100,00 |        |        |        | 100,00 |
|     |                     |                      | 938 |        |        |        | 100,00 |        |        |        | 100,00 |
| 313 | F(100,00)           | F(100,00)            | 939 |        |        |        | 100,00 |        |        |        | 100,00 |
|     |                     |                      | 940 |        | 100,00 |        |        |        | 100,00 |        |        |
|     |                     |                      | 941 |        |        |        | 100,00 |        |        |        | 100,00 |
|     |                     |                      | 942 |        |        |        | 100,00 |        |        |        | 98,75  |
| 315 | V(100,00)           | V(100,00)            | 943 |        |        | 100,00 |        |        |        | 100,00 |        |
|     |                     |                      | 944 |        |        |        | 100,00 |        |        |        | 100,00 |
|     |                     |                      | 945 |        | 100,00 |        |        |        | 100,00 |        |        |
|     |                     |                      | 946 |        |        |        | 100,00 |        |        |        | 100,00 |
| 316 | C(100,00)           | C(100,00)            | 947 |        |        | 100,00 |        |        |        | 100,00 |        |
|     |                     |                      | 948 |        | 100,00 |        |        |        | 100,00 |        |        |
|     |                     |                      | 949 |        |        | 100,00 |        |        |        | 100,00 |        |
|     |                     |                      | 950 |        |        | 100,00 |        |        |        | 100,00 |        |
| 317 | G(100,00)           | G(100,00)            | 951 |        |        | 100,00 |        |        |        | 100,00 |        |
|     |                     |                      | 952 |        |        | 100,00 |        |        |        | 100,00 |        |
|     |                     |                      | 953 | 100,00 |        |        |        | 100,00 |        |        |        |
|     |                     |                      | 954 |        |        |        | 100,00 |        |        |        | 100,00 |
| 319 | D(100,00)           | D(100,00)            | 955 |        |        | 100,00 |        |        |        | 100,00 |        |
|     |                     |                      | 956 | 100,00 |        |        |        | 100,00 |        |        |        |
|     |                     |                      | 957 |        |        |        | 100,00 |        |        |        | 100,00 |
|     |                     |                      | 958 |        | 100,00 |        |        |        | 100,00 |        |        |
| 320 | L(100,00)           | L(100,00)            | 959 |        |        |        | 100,00 |        |        |        | 100,00 |
|     |                     |                      | 960 | 6,19   |        | 93,81  |        |        |        | 100,00 |        |

|     |                     |           |      |        |        |        |        |        |        |        |        |
|-----|---------------------|-----------|------|--------|--------|--------|--------|--------|--------|--------|--------|
| 321 | V(100,00)           | V(100,00) | 961  |        |        | 100,00 |        |        |        | 100,00 |        |
|     |                     |           | 962  |        |        |        | 100,00 |        |        |        | 100,00 |
|     |                     |           | 963  |        | 99,39  |        | 0,61   |        | 100,00 |        |        |
| 322 | V(100,00)           | V(100,00) | 964  |        |        | 100,00 |        |        |        | 100,00 |        |
|     |                     |           | 965  |        |        |        | 100,00 |        |        |        | 100,00 |
|     |                     |           | 966  |        |        | 100,00 |        |        |        | 100,00 |        |
| 323 | V(100,00)           | V(100,00) | 967  |        |        | 100,00 |        |        |        | 100,00 |        |
|     |                     |           | 968  |        |        |        | 100,00 |        |        |        | 100,00 |
|     |                     |           | 969  |        |        | 100,00 |        |        |        | 100,00 |        |
| 324 | A(100,00)           | A(100,00) | 970  |        |        | 100,00 |        |        |        | 100,00 |        |
|     |                     |           | 971  |        | 100,00 |        |        |        | 100,00 |        |        |
|     |                     |           | 972  |        |        |        | 100,00 |        |        |        | 100,00 |
| 325 | E(99,67)<br>X(0,33) | E(100,00) | 973  |        |        | 99,67  |        |        |        | 100,00 |        |
|     |                     |           | 974  | 99,67  |        |        |        | 100,00 |        |        |        |
|     |                     |           | 975  |        |        | 100,00 |        |        |        | 100,00 |        |
| 326 | S(100,00)           | S(100,00) | 976  | 100,00 |        |        |        | 100,00 |        |        |        |
|     |                     |           | 977  |        |        | 100,00 |        |        |        | 100,00 |        |
|     |                     |           | 978  |        | 99,76  |        | 0,24   |        | 100,00 |        |        |
| 327 | D(100,00)           | D(100,00) | 979  |        |        | 100,00 |        |        |        | 100,00 |        |
|     |                     |           | 980  | 100,00 |        |        |        | 100,00 |        |        |        |
|     |                     |           | 981  |        | 2,04   |        | 97,96  |        |        |        | 100,00 |
| 328 | G(100,00)           | G(100,00) | 982  |        |        | 100,00 |        |        |        | 100,00 |        |
|     |                     |           | 983  |        |        | 100,00 |        |        |        | 100,00 |        |
|     |                     |           | 984  |        | 100,00 |        |        |        | 100,00 |        |        |
| 329 | V(100,00)           | V(100,00) | 985  |        |        | 100,00 |        |        |        | 100,00 |        |
|     |                     |           | 986  |        |        |        | 100,00 |        |        |        | 100,00 |
|     |                     |           | 987  |        |        |        | 100,00 |        |        |        | 100,00 |
| 330 | D(100,00)           | D(100,00) | 988  |        |        | 100,00 |        |        |        | 100,00 |        |
|     |                     |           | 989  | 100,00 |        |        |        | 100,00 |        |        |        |
|     |                     |           | 990  |        | 99,31  |        | 0,69   |        | 100,00 |        |        |
| 331 | G(100,00)           | G(100,00) | 991  |        |        | 100,00 |        |        |        | 100,00 |        |
|     |                     |           | 992  |        |        | 100,00 |        |        |        | 100,00 |        |
|     |                     |           | 993  |        |        | 100,00 |        |        |        | 100,00 |        |
| 332 | D(100,00)           | D(100,00) | 994  |        |        | 100,00 |        |        |        | 100,00 |        |
|     |                     |           | 995  | 100,00 |        |        |        | 100,00 |        |        |        |
|     |                     |           | 996  |        |        |        | 100,00 |        |        |        | 100,00 |
| 333 | R(100,00)           | R(100,00) | 997  | 100,00 |        |        |        | 100,00 |        |        |        |
|     |                     |           | 998  |        |        | 100,00 |        |        |        | 100,00 |        |
|     |                     |           | 999  | 100,00 |        |        |        | 100,00 |        |        |        |
| 334 | A(100,00)           | A(100,00) | 1000 |        |        | 100,00 |        |        |        | 100,00 |        |
|     |                     |           | 1001 |        | 100,00 |        |        |        | 100,00 |        |        |
|     |                     |           | 1002 | 97,11  |        | 2,89   |        | 100,00 |        |        |        |
