# Supplementary material for: Late Relapse and Reinfection in HCV Patients Treated with Direct-Acting Antiviral (DAA) Drugs
Source: MDPI journal article supplement (doi:10.3390/v13061151), 2021-06-16
Supplement: s1 [file s1]

**Table S4.** Frequency of substitutions in Pt4 with respect to a GT1b reference sequence (EU781827.1). The relevant amino acid and nucleotide changes between T0 and T1 are written in red.

| NS5B<br>aa position | Pt4       |           | NS5B<br>nt position | T0 (1b) |        |        |        | - | Pt4    |        |        |        | -      |
|---------------------|-----------|-----------|---------------------|---------|--------|--------|--------|---|--------|--------|--------|--------|--------|
|                     | T0 (1b)   | T1 (1b)   |                     | A       | C      | G      | T      |   | A      | C      | G      | T      |        |
| 179                 | V(100,00) | V(100,00) | 535                 |         |        | 100,00 |        |   |        |        | 100,00 |        |        |
|                     |           |           | 536                 |         |        |        | 100,00 |   |        |        |        | 100,00 |        |
|                     |           |           | 537                 |         | 100,00 |        |        |   |        | 100,00 |        |        |        |
| 180                 | S(100,00) | S(100,00) | 538                 |         |        |        | 100,00 |   |        |        |        |        | 100,00 |
|                     |           |           | 539                 |         | 100,00 |        |        |   |        | 100,00 |        |        |        |
|                     |           |           | 540                 |         | 100,00 |        |        |   |        | 100,00 |        |        |        |
| 181                 | T(100,00) | N(100,00) | 541                 | 100,00  |        |        |        |   | 100,00 |        |        |        |        |
|                     |           |           | 542                 |         | 100,00 |        |        |   | 100,00 |        |        |        |        |
|                     |           |           | 543                 |         | 100,00 |        |        |   |        | 100,00 |        |        |        |
| 182                 | L(100,00) | L(100,00) | 544                 |         | 100,00 |        |        |   |        | 100,00 |        |        |        |
|                     |           |           | 545                 |         |        |        | 100,00 |   |        |        |        | 100,00 |        |
|                     |           |           | 546                 |         | 100,00 |        |        |   |        | 100,00 |        |        |        |
| 183                 | P(100,00) | P(100,00) | 547                 |         | 100,00 |        |        |   |        | 100,00 |        |        |        |
|                     |           |           | 548                 |         | 100,00 |        |        |   |        | 100,00 |        |        |        |
|                     |           |           | 549                 |         | 97,62  |        | 2,38   |   |        | 100,00 |        |        |        |
| 184                 | Q(100,00) | Q(100,00) | 550                 |         | 100,00 |        |        |   |        | 100,00 |        |        |        |
|                     |           |           | 551                 | 100,00  |        |        |        |   | 100,00 |        |        |        |        |
|                     |           |           | 552                 |         |        | 100,00 |        |   |        |        | 100,00 |        |        |
| 185                 | A(100,00) | A(100,00) | 553                 |         |        |        |        |   |        |        |        |        |        |
|                     |           |           | 554                 |         | 100,00 |        |        |   |        | 100,00 |        |        |        |
|                     |           |           | 555                 |         | 100,00 |        |        |   |        | 100,00 |        |        |        |
| 186                 | V(100,00) | V(100,00) | 556                 |         |        | 100,00 |        |   |        |        | 100,00 |        |        |
|                     |           |           | 557                 |         |        |        | 100,00 |   |        |        |        | 100,00 |        |
|                     |           |           | 558                 |         |        | 100,00 |        |   |        |        | 100,00 |        |        |
| 187                 | M(100,00) | M(100,00) | 559                 | 100,00  |        |        |        |   | 100,00 |        |        |        |        |
|                     |           |           | 560                 |         |        |        | 100,00 |   |        |        |        | 100,00 |        |
|                     |           |           | 561                 |         |        | 100,00 |        |   |        |        | 100,00 |        |        |
| 188                 | G(100,00) | G(100,00) | 562                 |         |        | 100,00 |        |   |        |        |        |        |        |
|                     |           |           | 563                 |         |        | 100,00 |        |   |        |        |        |        |        |
|                     |           |           | 564                 |         | 100,00 |        |        |   |        | 100,00 |        |        |        |
| 189                 | S(100,00) | S(100,00) | 565                 |         |        |        | 100,00 |   |        |        |        |        | 100,00 |
|                     |           |           | 566                 |         | 100,00 |        |        |   |        | 100,00 |        |        |        |
|                     |           |           | 567                 |         | 100,00 |        |        |   |        | 100,00 |        |        |        |
| 190                 | S(100,00) | S(100,00) | 568                 |         |        |        | 100,00 |   |        |        |        |        | 100,00 |
|                     |           |           | 569                 |         | 100,00 |        |        |   |        | 100,00 |        |        |        |
|                     |           |           | 570                 | 100,00  |        |        |        |   | 100,00 |        |        |        |        |
| 191                 | Y(100,00) | Y(100,00) | 571                 |         |        |        | 100,00 |   |        |        |        |        | 100,00 |
|                     |           |           | 572                 | 100,00  |        |        |        |   | 100,00 |        |        |        |        |
|                     |           |           | 573                 |         | 100,00 |        |        |   |        | 100,00 |        |        |        |
| 192                 | G(100,00) | G(100,00) | 574                 |         |        | 100,00 |        |   |        |        | 100,00 |        |        |
|                     |           |           | 575                 |         |        | 100,00 |        |   |        |        | 100,00 |        |        |
|                     |           |           | 576                 | 3,65    |        | 96,35  |        |   |        |        | 100,00 |        |        |
| 193                 | F(100,00) | F(100,00) | 577                 |         |        |        | 100,00 |   |        |        |        |        | 100,00 |
|                     |           |           | 578                 |         |        |        | 100,00 |   |        |        |        |        | 100,00 |
|                     |           |           | 579                 |         | 100,00 |        |        |   |        | 100,00 |        |        |        |
| 194                 | Q(100,00) | Q(100,00) | 580                 |         | 100,00 |        |        |   |        | 100,00 |        |        |        |
|                     |           |           | 581                 | 100,00  |        |        |        |   | 100,00 |        |        |        |        |
|                     |           |           | 582                 | 100,00  |        |        |        |   | 100,00 |        |        |        |        |
| 195                 | Y(100,00) | Y(100,00) | 583                 |         |        |        | 100,00 |   |        |        |        |        | 100,00 |
|                     |           |           | 584                 | 100,00  |        |        |        |   | 100,00 |        |        |        |        |
|                     |           |           | 585                 |         | 100,00 |        |        |   |        | 100,00 |        |        |        |
| 196                 | S(100,00) | S(100,00) | 586                 |         |        |        | 100,00 |   |        |        |        |        | 100,00 |
|                     |           |           | 587                 |         | 100,00 |        |        |   |        | 100,00 |        |        |        |
|                     |           |           | 588                 |         |        |        | 100,00 |   |        |        |        |        | 100,00 |
| 197                 | P(100,00) | P(100,00) | 589                 |         | 100,00 |        |        |   |        | 100,00 |        |        |        |

|     |           |           |     |        |        |        |        |        |        |        |
|-----|-----------|-----------|-----|--------|--------|--------|--------|--------|--------|--------|
|     |           |           | 590 | 100,00 |        |        |        | 100,00 |        |        |
|     |           |           | 591 |        |        |        | 100,00 |        |        | 100,00 |
| 198 | G(100,00) | G(100,00) | 592 |        |        | 100,00 |        |        | 100,00 |        |
|     |           |           | 593 |        |        | 100,00 |        |        | 100,00 |        |
|     |           |           | 594 | 100,00 |        |        |        | 100,00 |        |        |
| 199 | Q(100,00) | Q(100,00) | 595 |        | 100,00 |        |        |        | 100,00 |        |
|     |           |           | 596 | 100,00 |        |        |        | 100,00 |        |        |
|     |           |           | 597 |        |        | 100,00 |        |        |        | 100,00 |
| 200 | R(100,00) | R(100,00) | 598 |        | 100,00 |        |        |        | 100,00 |        |
|     |           |           | 599 |        |        | 100,00 |        |        | 100,00 |        |
|     |           |           | 600 | 0,98   |        | 99,02  |        |        | 100,00 |        |
| 201 | V(100,00) | V(100,00) | 601 |        |        | 100,00 |        |        | 100,00 |        |
|     |           |           | 602 |        |        |        | 100,00 |        |        | 100,00 |
|     |           |           | 603 |        |        |        | 100,00 |        |        | 100,00 |
| 202 | E(100,00) | E(100,00) | 604 |        |        | 100,00 |        |        | 100,00 |        |
|     |           |           | 605 | 100,00 |        |        |        | 100,00 |        |        |
|     |           |           | 606 | 1,68   |        | 98,32  |        |        | 100,00 |        |
| 203 | F(100,00) | F(100,00) | 607 |        |        |        | 100,00 |        |        | 100,00 |
|     |           |           | 608 |        |        |        | 100,00 |        |        | 100,00 |
|     |           |           | 609 |        | 100,00 |        |        |        |        | 100,00 |
| 204 | L(100,00) | L(100,00) | 610 |        | 100,00 |        |        |        | 100,00 |        |
|     |           |           | 611 |        |        |        | 100,00 |        |        | 100,00 |
|     |           |           | 612 |        |        | 100,00 |        | 1,40   | 98,60  |        |
| 205 | V(100,00) | V(100,00) | 613 |        |        | 100,00 |        |        | 100,00 |        |
|     |           |           | 614 |        |        |        | 100,00 |        |        | 100,00 |
|     |           |           | 615 |        |        | 100,00 |        |        | 100,00 |        |
| 206 | N(100,00) | N(100,00) | 616 | 100,00 |        |        |        | 100,00 |        |        |
|     |           |           | 617 | 100,00 |        |        |        | 100,00 |        |        |
|     |           |           | 618 |        | 2,81   |        | 97,19  |        |        | 100,00 |
| 207 | A(100,00) | A(100,00) | 619 |        |        | 100,00 |        |        | 100,00 |        |
|     |           |           | 620 |        | 100,00 |        |        |        | 100,00 |        |
|     |           |           | 621 |        | 100,00 |        |        |        | 100,00 |        |
| 208 | W(100,00) | W(100,00) | 622 |        |        |        | 100,00 |        |        | 100,00 |
|     |           |           | 623 |        |        | 100,00 |        |        | 100,00 |        |
|     |           |           | 624 |        |        | 100,00 |        |        | 100,00 |        |
| 209 | K(100,00) | K(100,00) | 625 | 100,00 |        |        |        | 100,00 |        |        |
|     |           |           | 626 | 100,00 |        |        |        | 100,00 |        |        |
|     |           |           | 627 | 100,00 |        |        |        | 100,00 |        |        |
| 210 | S(100,00) | S(100,00) | 628 |        |        |        | 100,00 |        |        | 100,00 |
|     |           |           | 629 |        | 100,00 |        |        | 100,00 |        |        |
|     |           |           | 630 | 100,00 |        |        |        | 100,00 |        |        |
| 211 | K(100,00) | K(100,00) | 631 | 100,00 |        |        |        | 100,00 |        |        |
|     |           |           | 632 | 100,00 |        |        |        | 100,00 |        |        |
|     |           |           | 633 |        |        | 100,00 |        |        | 100,00 |        |
| 212 | K(100,00) | K(100,00) | 634 | 100,00 |        |        |        | 100,00 |        |        |
|     |           |           | 635 | 100,00 |        |        |        | 100,00 |        |        |
|     |           |           | 636 | 100,00 |        |        |        | 100,00 |        |        |
| 213 | C(100,00) | C(100,00) | 637 |        |        |        | 100,00 |        |        | 100,00 |
|     |           |           | 638 |        |        | 100,00 |        |        | 100,00 |        |
|     |           |           | 639 |        | 100,00 |        |        |        | 100,00 |        |
| 214 | P(100,00) | P(100,00) | 640 |        | 100,00 |        |        |        | 100,00 |        |
|     |           |           | 641 |        | 100,00 |        |        |        | 100,00 |        |
|     |           |           | 642 |        | 99,02  |        | 0,98   |        | 100,00 |        |
| 215 | M(100,00) | M(100,00) | 643 | 100,00 |        |        |        | 100,00 |        |        |
|     |           |           | 644 |        |        |        | 100,00 |        |        | 100,00 |
|     |           |           | 645 |        |        | 100,00 |        |        | 100,00 |        |
| 216 | G(100,00) | G(100,00) | 646 |        |        | 100,00 |        |        | 100,00 |        |
|     |           |           | 647 |        |        | 100,00 |        |        | 100,00 |        |
|     |           |           | 648 |        | 100,00 |        |        | 100,00 |        |        |
| 217 | F(100,00) | F(100,00) | 649 |        |        |        | 100,00 |        |        | 100,00 |
|     |           |           | 650 |        |        |        | 100,00 |        |        | 100,00 |
|     |           |           | 651 |        |        |        | 100,00 |        |        | 100,00 |

|     |                     |                  |     |        |        |        |        |        |        |        |        |        |
|-----|---------------------|------------------|-----|--------|--------|--------|--------|--------|--------|--------|--------|--------|
| 218 | A(100,00)           | A(100,00)        | 652 |        |        | 100,00 |        |        |        |        |        |        |
|     |                     |                  | 653 |        | 100,00 |        |        |        |        | 100,00 |        |        |
|     |                     |                  | 654 | 100,00 |        |        |        |        | 99,79  |        | 0,21   |        |
| 219 | Y(100,00)           | Y(100,00)        | 655 |        |        |        | 100,00 |        |        |        |        | 100,00 |
|     |                     |                  | 656 | 100,00 |        |        |        |        | 100,00 |        |        |        |
|     |                     |                  | 657 |        |        |        | 100,00 |        |        |        |        | 100,00 |
| 220 | D(100,00)           | D(100,00)        | 658 |        |        | 100,00 |        |        |        | 100,00 |        |        |
|     |                     |                  | 659 | 100,00 |        |        |        |        | 100,00 |        |        |        |
|     |                     |                  | 660 |        | 2,24   |        | 97,76  |        |        |        |        | 100,00 |
| 221 | T(100,00)           | T(100,00)        | 661 | 100,00 |        |        |        |        | 100,00 |        |        |        |
|     |                     |                  | 662 |        | 100,00 |        |        |        |        | 100,00 |        |        |
|     |                     |                  | 663 |        | 100,00 |        |        |        |        | 100,00 |        |        |
| 222 | R(100,00)           | R(100,00)        | 664 |        | 100,00 |        |        |        |        | 100,00 |        |        |
|     |                     |                  | 665 |        |        | 100,00 |        |        |        |        | 100,00 |        |
|     |                     |                  | 666 |        | 100,00 |        |        |        |        | 100,00 |        |        |
| 223 | C(100,00)           | C(100,00)        | 667 |        |        |        | 100,00 |        |        |        | 100,00 | 100,00 |
|     |                     |                  | 668 |        |        |        |        |        |        |        |        |        |
|     |                     |                  | 669 |        |        |        | 100,00 |        |        |        |        | 100,00 |
| 224 | F(100,00)           | F(100,00)        | 670 |        |        |        |        | 100,00 |        |        |        | 100,00 |
|     |                     |                  | 671 |        |        |        |        | 100,00 |        |        |        | 100,00 |
|     |                     |                  | 672 |        |        |        |        | 100,00 |        |        |        | 100,00 |
| 225 | D(100,00)           | D(100,00)        | 673 |        |        | 100,00 |        |        |        | 100,00 |        |        |
|     |                     |                  | 674 | 100,00 |        |        |        |        | 100,00 |        |        |        |
|     |                     |                  | 675 |        | 100,00 |        |        |        |        | 100,00 |        |        |
| 226 | S(100,00)           | P(0,29) S(99,71) | 676 |        |        |        | 100,00 |        |        | 0,29   |        | 99,71  |
|     |                     |                  | 677 |        | 100,00 |        |        |        |        | 100,00 |        |        |
|     |                     |                  | 678 | 100,00 |        |        |        |        | 100,00 |        |        |        |
| 227 | T(100,00)           | T(100,00)        | 679 | 100,00 |        |        |        |        | 100,00 |        |        |        |
|     |                     |                  | 680 |        | 100,00 |        |        |        |        | 100,00 |        |        |
|     |                     |                  | 681 |        |        | 100,00 |        |        |        |        | 100,00 |        |
| 228 | V(100,00)           | V(100,00)        | 682 |        |        | 100,00 |        |        |        | 100,00 |        |        |
|     |                     |                  | 683 |        |        |        | 100,00 |        |        |        |        | 100,00 |
|     |                     |                  | 684 |        | 100,00 |        |        |        |        | 100,00 |        |        |
| 229 | T(100,00)           | T(100,00)        | 685 | 100,00 |        |        |        |        | 100,00 |        |        |        |
|     |                     |                  | 686 |        | 100,00 |        |        |        |        | 100,00 |        |        |
|     |                     |                  | 687 |        | 93,97  |        | 6,03   |        |        | 100,00 |        |        |
| 230 | E(100,00)           | E(100,00)        | 688 |        |        | 100,00 |        |        |        |        | 100,00 |        |
|     |                     |                  | 689 | 100,00 |        |        |        |        | 100,00 |        |        |        |
|     |                     |                  | 690 |        |        | 100,00 |        |        |        |        | 100,00 |        |
| 231 | N(6,03)<br>S(93,97) | S(100,00)        | 691 | 100,00 |        |        |        |        | 100,00 |        |        |        |
|     |                     |                  | 692 | 6,03   |        | 93,97  |        |        |        |        | 100,00 |        |
|     |                     |                  | 693 |        | 94,95  |        | 5,05   |        |        | 100,00 |        |        |
| 232 | D(100,00)           | D(100,00)        | 694 |        |        | 100,00 |        |        |        | 100,00 |        |        |
|     |                     |                  | 695 | 100,00 |        |        |        |        | 100,00 |        |        |        |
|     |                     |                  | 696 |        | 92,85  |        | 7,15   |        |        | 100,00 |        |        |
| 233 | I(100,00)           | I(100,00)        | 697 | 100,00 |        |        |        |        | 100,00 |        |        |        |
|     |                     |                  | 698 |        |        |        | 100,00 |        |        |        |        | 100,00 |
|     |                     |                  | 699 |        | 100,00 |        |        |        |        | 100,00 |        |        |
| 234 | R(100,00)           | R(100,00)        | 700 |        | 100,00 |        |        |        |        | 100,00 |        |        |
|     |                     |                  | 701 |        |        | 100,00 |        |        |        |        | 100,00 |        |
|     |                     |                  | 702 |        |        |        | 100,00 |        |        |        |        | 100,00 |
| 235 | V(100,00)           | V(100,00)        | 703 |        |        | 100,00 |        |        |        | 100,00 |        |        |
|     |                     |                  | 704 |        |        |        | 100,00 |        |        |        |        | 100,00 |
|     |                     |                  | 705 |        |        |        | 100,00 |        |        |        |        | 100,00 |
| 236 | E(100,00)           | E(100,00)        | 706 |        |        | 100,00 |        |        |        | 100,00 |        |        |
|     |                     |                  | 707 | 100,00 |        |        |        |        | 100,00 |        |        |        |
|     |                     |                  | 708 |        |        | 100,00 |        |        |        |        | 100,00 |        |
| 237 | E(100,00)           | E(100,00)        | 709 |        |        | 100,00 |        |        |        |        | 100,00 |        |
|     |                     |                  | 710 | 100,00 |        |        |        |        | 100,00 |        |        |        |
|     |                     |                  | 711 |        |        | 100,00 |        |        |        |        | 100,00 |        |
| 238 | S(100,00)           | S(100,00)        | 712 |        |        |        | 100,00 |        |        |        |        | 100,00 |
|     |                     |                  | 713 |        | 100,00 |        |        |        |        | 100,00 |        |        |

|     |           |                  |     |        |        |        |        |        |        |        |        |
|-----|-----------|------------------|-----|--------|--------|--------|--------|--------|--------|--------|--------|
|     |           |                  | 714 | 100,00 |        |        |        | 100,00 |        |        |        |
|     |           |                  | 715 | 100,00 |        |        |        | 100,00 |        |        |        |
| 239 | I(100,00) | I(100,00)        | 716 |        |        |        | 100,00 |        |        | 100,00 |        |
|     |           |                  | 717 |        | 3,23   |        | 96,77  |        |        | 100,00 |        |
|     |           |                  | 718 |        |        |        | 100,00 |        |        | 100,00 |        |
| 240 | Y(100,00) | C(0,21) Y(99,79) | 719 | 100,00 |        |        |        | 99,79  |        | 0,21   |        |
|     |           |                  | 720 |        | 100,00 |        |        |        | 100,00 |        |        |
|     |           |                  | 721 |        | 100,00 |        |        |        | 100,00 |        |        |
| 241 | Q(100,00) | Q(100,00)        | 722 | 100,00 |        |        |        | 100,00 |        |        |        |
|     |           |                  | 723 | 99,02  |        | 0,98   |        | 100,00 |        |        |        |
|     |           |                  | 724 |        |        |        | 100,00 |        |        |        | 100,00 |
| 242 | C(100,00) | C(100,00)        | 725 |        |        | 100,00 |        |        |        | 100,00 |        |
|     |           |                  | 726 |        |        |        | 100,00 |        |        |        | 100,00 |
|     |           |                  | 727 |        |        |        | 100,00 |        |        |        | 100,00 |
| 243 | C(100,00) | C(100,00)        | 728 |        |        | 100,00 |        |        |        | 100,00 |        |
|     |           |                  | 729 |        |        |        | 100,00 |        |        |        | 100,00 |
|     |           |                  | 730 |        |        | 100,00 |        |        |        | 100,00 |        |
| 244 | D(100,00) | D(100,00)        | 731 | 100,00 |        |        |        | 100,00 |        |        |        |
|     |           |                  | 732 |        | 100,00 |        |        |        | 100,00 |        |        |
|     |           |                  | 733 |        |        |        | 100,00 |        |        |        | 100,00 |
| 245 | L(100,00) | L(100,00)        | 734 |        |        |        | 100,00 |        |        |        | 100,00 |
|     |           |                  | 735 |        |        | 100,00 |        |        |        | 100,00 |        |
|     |           |                  | 736 |        |        | 100,00 |        |        |        | 100,00 |        |
| 246 | A(100,00) | A(99,79) V(0,21) | 737 |        | 100,00 |        |        |        | 99,79  |        | 0,21   |
|     |           |                  | 738 |        | 100,00 |        |        |        | 100,00 |        |        |
|     |           |                  | 739 |        | 100,00 |        |        |        | 100,00 |        |        |
| 247 | P(100,00) | P(100,00)        | 740 |        | 100,00 |        |        |        | 100,00 |        |        |
|     |           |                  | 741 |        | 100,00 |        |        |        | 100,00 |        |        |
|     |           |                  | 742 |        |        | 100,00 |        |        |        | 100,00 |        |
| 248 | E(100,00) | E(100,00)        | 743 | 100,00 |        |        |        | 100,00 |        |        |        |
|     |           |                  | 744 | 100,00 |        |        |        | 100,00 |        |        |        |
|     |           |                  | 745 |        |        | 100,00 |        |        |        | 100,00 |        |
| 249 | A(100,00) | A(100,00)        | 746 |        | 100,00 |        |        |        | 100,00 |        |        |
|     |           |                  | 747 |        | 100,00 |        |        |        | 100,00 |        |        |
|     |           |                  | 748 | 100,00 |        |        |        | 100,00 |        |        |        |
| 250 | R(100,00) | R(100,00)        | 749 |        |        | 100,00 |        |        |        | 100,00 |        |
|     |           |                  | 750 | 99,02  |        | 0,98   |        | 99,51  |        | 0,49   |        |
|     |           |                  | 751 |        | 100,00 |        |        |        | 100,00 |        |        |
| 251 | Q(100,00) | Q(100,00)        | 752 | 100,00 |        |        |        | 100,00 |        |        |        |
|     |           |                  | 753 |        |        | 100,00 |        |        |        | 100,00 |        |
|     |           |                  | 754 |        |        | 100,00 |        |        |        | 100,00 |        |
| 252 | V(100,00) | V(100,00)        | 755 |        |        |        | 100,00 |        |        |        | 100,00 |
|     |           |                  | 756 |        | 98,74  |        | 1,26   |        | 100,00 |        |        |
|     |           |                  | 757 | 100,00 |        |        |        | 100,00 |        |        |        |
| 253 | I(100,00) | I(100,00)        | 758 |        |        |        | 100,00 |        |        |        | 100,00 |
|     |           |                  | 759 | 100,00 |        |        |        | 100,00 |        |        |        |
|     |           |                  | 760 | 100,00 |        |        |        | 100,00 |        |        |        |
| 254 | K(100,00) | K(100,00)        | 761 | 100,00 |        |        |        | 100,00 |        |        |        |
|     |           |                  | 762 |        |        | 100,00 |        |        |        | 100,00 |        |
|     |           |                  | 763 |        |        | 100,00 |        |        |        | 100,00 |        |
| 255 | A(100,00) | A(100,00)        | 764 |        | 100,00 |        |        |        | 100,00 |        |        |
|     |           |                  | 765 |        |        | 100,00 |        |        |        | 100,00 |        |
|     |           |                  | 766 |        | 100,00 |        |        |        | 100,00 |        |        |
| 256 | L(100,00) | L(100,00)        | 767 |        |        |        | 100,00 |        |        |        | 100,00 |
|     |           |                  | 768 |        | 100,00 |        |        |        | 100,00 |        |        |
|     |           |                  | 769 | 100,00 |        |        |        | 100,00 |        |        |        |
| 257 | T(100,00) | T(100,00)        | 770 |        | 100,00 |        |        |        | 100,00 |        |        |
|     |           |                  | 771 | 100,00 |        |        |        | 100,00 |        |        |        |
|     |           |                  | 772 |        |        | 100,00 |        |        |        | 100,00 |        |
| 258 | E(100,00) | E(100,00)        | 773 | 100,00 |        |        |        | 100,00 |        |        |        |
|     |           |                  | 774 |        |        | 100,00 |        | 6,14   |        | 93,86  |        |
| 259 | R(100,00) | R(100,00)        | 775 |        | 100,00 |        |        |        | 100,00 |        |        |

|     |                     |                 |     |        |        |        |        |        |        |        |
|-----|---------------------|-----------------|-----|--------|--------|--------|--------|--------|--------|--------|
|     |                     |                 | 776 |        |        | 100,00 |        |        | 100,00 |        |
|     |                     |                 | 777 |        |        | 100,00 |        |        | 100,00 |        |
| 260 | L(100,00)           | L(100,00)       | 778 |        | 100,00 |        |        |        | 100,00 |        |
|     |                     |                 | 779 |        |        |        | 100,00 |        |        | 100,00 |
|     |                     |                 | 780 |        | 100,00 |        |        | 99,34  | 0,66   |        |
| 261 | Y(100,00)           | Y(100,00)       | 781 |        |        |        | 100,00 |        |        | 100,00 |
|     |                     |                 | 782 | 100,00 |        |        |        | 100,00 |        |        |
|     |                     |                 | 783 |        |        |        | 100,00 |        |        | 100,00 |
| 262 | I(100,00)           | I(100,00)       | 784 | 100,00 |        |        |        | 100,00 |        |        |
|     |                     |                 | 785 |        |        |        | 100,00 |        |        | 100,00 |
|     |                     |                 | 786 |        | 100,00 |        |        | 100,00 |        |        |
| 263 | G(100,00)           | G(100,00)       | 787 |        |        | 100,00 |        |        | 100,00 |        |
|     |                     |                 | 788 |        |        | 100,00 |        |        | 100,00 |        |
|     |                     |                 | 789 |        |        | 100,00 |        |        | 100,00 |        |
| 264 | G(100,00)           | G(100,00)       | 790 |        |        | 100,00 |        |        | 100,00 |        |
|     |                     |                 | 791 |        |        | 100,00 |        |        | 100,00 |        |
|     |                     |                 | 792 |        | 100,00 |        |        | 100,00 |        |        |
| 265 | P(100,00)           | P(100,00)       | 793 |        | 100,00 |        |        | 100,00 |        |        |
|     |                     |                 | 794 |        | 100,00 |        |        | 100,00 |        |        |
|     |                     |                 | 795 |        | 100,00 |        |        | 100,00 |        |        |
| 266 | L(100,00)           | L(100,00)       | 796 |        |        |        | 100,00 |        |        | 100,00 |
|     |                     |                 | 797 |        |        |        | 100,00 |        |        | 100,00 |
|     |                     |                 | 798 | 14,45  |        | 85,55  |        |        | 100,00 |        |
| 267 | A(1,26)<br>T(98,74) | A(0,95) T(99,5) | 799 | 98,74  |        | 1,26   |        | 99,05  | 0,95   |        |
|     |                     |                 | 800 |        | 100,00 |        |        | 100,00 |        |        |
|     |                     |                 | 801 |        | 100,00 |        |        | 100,00 |        |        |
| 268 | N(100,00)           | N(100,00)       | 802 | 100,00 |        |        |        | 100,00 |        |        |
|     |                     |                 | 803 | 100,00 |        |        |        | 100,00 |        |        |
|     |                     |                 | 804 |        |        |        | 100,00 | 0,21   |        | 99,79  |
| 269 | S(100,00)           | S(100,00)       | 805 |        |        |        | 100,00 |        |        | 100,00 |
|     |                     |                 | 806 |        | 100,00 |        |        | 100,00 |        |        |
|     |                     |                 | 807 | 100,00 |        |        |        | 100,00 |        |        |
| 270 | K(100,00)           | K(100,00)       | 808 | 100,00 |        |        |        | 100,00 |        |        |
|     |                     |                 | 809 | 100,00 |        |        |        | 100,00 |        |        |
|     |                     |                 | 810 | 100,00 |        |        |        | 100,00 |        |        |
| 271 | G(100,00)           | G(100,00)       | 811 |        |        | 100,00 |        |        | 100,00 |        |
|     |                     |                 | 812 |        |        | 100,00 |        |        | 100,00 |        |
|     |                     |                 | 813 |        |        | 100,00 |        |        | 100,00 |        |
| 272 | Q(100,00)           | Q(100,00)       | 814 |        | 100,00 |        |        | 100,00 |        |        |
|     |                     |                 | 815 | 100,00 |        |        |        | 100,00 |        |        |
|     |                     |                 | 816 |        |        | 100,00 |        |        | 100,00 |        |
| 273 | N(100,00)           | N(100,00)       | 817 | 100,00 |        |        |        | 100,00 |        |        |
|     |                     |                 | 818 | 100,00 |        |        |        | 100,00 |        |        |
|     |                     |                 | 819 |        | 100,00 |        |        | 100,00 |        |        |
| 274 | C(100,00)           | C(100,00)       | 820 |        |        |        | 100,00 |        | 100,00 | 100,00 |
|     |                     |                 | 821 |        |        | 100,00 |        |        | 100,00 |        |
|     |                     |                 | 822 |        | 100,00 |        |        | 100,00 |        |        |
| 275 | G(100,00)           | G(100,00)       | 823 |        |        | 100,00 |        |        | 100,00 |        |
|     |                     |                 | 824 |        |        | 100,00 |        |        | 100,00 |        |
|     |                     |                 | 825 |        | 83,87  |        | 16,13  | 100,00 |        |        |
| 276 | Y(100,00)           | Y(100,00)       | 826 |        |        |        | 100,00 |        |        | 100,00 |
|     |                     |                 | 827 | 100,00 |        |        |        | 100,00 |        |        |
|     |                     |                 | 828 |        |        |        | 100,00 |        |        | 100,00 |
| 277 | R(100,00)           | R(100,00)       | 829 |        | 100,00 |        |        | 100,00 |        |        |
|     |                     |                 | 830 |        |        | 100,00 |        |        | 100,00 |        |
|     |                     |                 | 831 |        | 100,00 |        |        | 100,00 |        |        |
| 278 | R(100,00)           | R(100,00)       | 832 |        | 100,00 |        |        | 100,00 |        |        |
|     |                     |                 | 833 |        |        | 100,00 |        |        | 100,00 |        |
|     |                     |                 | 834 |        |        | 100,00 |        |        | 100,00 |        |
| 279 | C(100,00)           | C(100,00)       | 835 |        |        |        | 100,00 |        | 100,00 | 100,00 |
|     |                     |                 | 836 |        |        | 100,00 |        |        | 100,00 |        |
|     |                     |                 | 837 |        | 100,00 |        |        | 100,00 |        |        |

|     |           |           |     |        |        |        |        |        |        |        |
|-----|-----------|-----------|-----|--------|--------|--------|--------|--------|--------|--------|
| 280 | R(100,00) | R(100,00) | 838 | 100,00 |        |        |        | 100,00 |        |        |
|     |           |           | 839 |        | 100,00 |        |        |        | 100,00 |        |
|     |           |           | 840 | 100,00 |        |        |        | 98,39  |        | 1,61   |
| 281 | A(100)    | A(100)    | 841 |        |        | 100,00 |        |        | 100,00 |        |
|     |           |           | 842 | 100,00 |        |        |        | 100,00 |        |        |
|     |           |           | 843 | 1,26   |        | 98,74  |        |        | 100,00 |        |
| 282 | S(100,00) | S(100,00) | 844 | 100,00 |        |        |        | 100,00 |        |        |
|     |           |           | 845 |        | 100,00 |        |        |        | 100,00 |        |
|     |           |           | 846 |        | 100,00 |        |        | 99,75  |        | 0,25   |
| 283 | G(100,00) | G(100,00) | 847 |        |        | 100,00 |        |        | 100,00 |        |
|     |           |           | 848 |        |        | 100,00 |        |        | 100,00 |        |
|     |           |           | 849 |        | 99,30  |        | 0,70   | 100,00 |        |        |
| 284 | V(100,00) | V(100,00) | 850 |        |        | 100,00 |        |        | 100,00 |        |
|     |           |           | 851 |        |        |        | 100,00 |        |        | 100,00 |
|     |           |           | 852 |        |        | 100,00 |        |        | 100,00 |        |
| 285 | L(100,00) | L(100,00) | 853 | 100,00 |        |        |        | 100,00 |        |        |
|     |           |           | 854 |        |        |        | 100,00 |        |        | 100,00 |
|     |           |           | 855 |        |        | 100,00 |        |        | 100,00 |        |
| 286 | T(100,00) | T(100,00) | 856 | 100,00 |        |        |        | 100,00 |        |        |
|     |           |           | 857 |        | 100,00 |        |        | 100,00 |        |        |
|     |           |           | 858 |        |        | 100,00 |        |        | 100,00 |        |
| 287 | T(100,00) | T(100,00) | 859 | 100,00 |        |        |        | 100,00 |        |        |
|     |           |           | 860 |        | 100,00 |        |        | 100,00 |        |        |
|     |           |           | 861 |        | 99,30  |        | 0,70   | 100,00 |        |        |
| 288 | S(100,00) | S(100,00) | 862 | 100,00 |        |        |        | 100,00 |        |        |
|     |           |           | 863 |        |        | 100,00 |        |        | 100,00 |        |
|     |           |           | 864 |        | 100,00 |        |        | 100,00 |        |        |
| 289 | C(100,00) | C(100,00) | 865 |        |        |        | 100,00 |        |        | 100,00 |
|     |           |           | 866 |        |        | 100,00 |        |        | 100,00 |        |
|     |           |           | 867 |        | 100,00 |        |        | 100,00 |        |        |
| 290 | G(100,00) | G(100,00) | 868 |        |        | 100,00 |        |        | 100,00 |        |
|     |           |           | 869 |        |        | 100,00 |        |        | 100,00 |        |
|     |           |           | 870 |        | 3,37   |        | 96,63  |        |        | 100,00 |
| 291 | N(100,00) | N(100,00) | 871 | 100,00 |        |        |        | 100,00 |        |        |
|     |           |           | 872 | 100,00 |        |        |        | 100,00 |        |        |
|     |           |           | 873 |        |        |        | 100,00 |        |        | 100,00 |
| 292 | T(100,00) | T(100,00) | 874 | 100,00 |        |        |        | 100,00 |        |        |
|     |           |           | 875 |        | 100,00 |        |        | 100,00 |        |        |
|     |           |           | 876 |        | 100,00 |        |        | 100,00 |        |        |
| 293 | L(100,00) | L(100,00) | 877 |        | 100,00 |        |        | 100,00 |        |        |
|     |           |           | 878 |        |        |        | 100,00 |        |        | 100,00 |
|     |           |           | 879 |        | 100,00 |        |        | 100,00 |        |        |
| 294 | T(100,00) | T(100,00) | 880 | 100,00 |        |        |        | 100,00 |        |        |
|     |           |           | 881 |        | 100,00 |        |        | 100,00 |        |        |
|     |           |           | 882 |        | 100,00 |        |        | 100,00 |        |        |
| 295 | C(100,00) | C(100,00) | 883 |        |        |        | 100,00 |        |        | 100,00 |
|     |           |           | 884 |        |        | 100,00 |        |        | 100,00 |        |
|     |           |           | 885 |        | 0,98   |        | 99,02  |        |        | 100,00 |
| 296 | Y(100,00) | Y(100,00) | 886 |        |        |        | 100,00 |        |        | 100,00 |
|     |           |           | 887 | 100,00 |        |        |        | 100,00 |        |        |
|     |           |           | 888 |        | 100,00 |        |        |        |        | 100,00 |
| 297 | L(100,00) | L(100,00) | 889 |        |        |        | 100,00 |        |        | 100,00 |
|     |           |           | 890 |        |        |        | 100,00 |        |        | 100,00 |
|     |           |           | 891 | 100,00 |        |        |        | 100,00 |        |        |
| 298 | K(100,00) | K(100,00) | 892 | 100,00 |        |        |        | 100,00 |        |        |
|     |           |           | 893 | 100,00 |        |        |        | 100,00 |        |        |
|     |           |           | 894 |        |        | 100,00 |        |        | 100,00 |        |
| 299 | A(100,00) | A(100,00) | 895 |        |        | 100,00 |        |        | 100,00 |        |
|     |           |           | 896 |        | 100,00 |        |        | 100,00 |        |        |
|     |           |           | 897 |        | 100,00 |        |        | 100,00 |        |        |
| 300 | S(100,00) | S(100,00) | 898 |        |        |        | 100,00 |        |        | 100,00 |
|     |           |           | 899 |        | 100,00 |        |        | 100,00 |        |        |

|     |           |                  |     |        |        |        |        |        |        |        |        |        |  |
|-----|-----------|------------------|-----|--------|--------|--------|--------|--------|--------|--------|--------|--------|--|
|     |           |                  | 900 |        |        |        | 100,00 |        |        | 0,45   |        | 99,55  |  |
| 301 | A(100,00) | A(99,18) V(0,82) | 901 |        |        | 100,00 |        |        |        | 100,00 |        |        |  |
|     |           |                  | 902 |        | 100,00 |        |        |        | 99,18  |        | 0,82   |        |  |
|     |           |                  | 903 | 0,84   |        | 99,16  |        |        |        | 100,00 |        |        |  |
| 302 | A(100,00) | A(100,00)        | 904 |        |        | 100,00 |        |        |        | 100,00 |        |        |  |
|     |           |                  | 905 |        | 100,00 |        |        |        | 100,00 |        |        |        |  |
|     |           |                  | 906 |        | 100,00 |        |        |        | 100,00 |        |        |        |  |
| 303 | C(100,00) | C(100,00)        | 907 |        |        |        | 100,00 |        |        |        | 100,00 |        |  |
|     |           |                  | 908 |        |        | 100,00 |        |        |        | 100,00 |        |        |  |
|     |           |                  | 909 |        |        |        | 100,00 |        | 100,00 |        |        |        |  |
| 304 | R(100,00) | R(100,00)        | 910 |        | 100,00 |        |        |        | 100,00 |        |        |        |  |
|     |           |                  | 911 |        |        | 100,00 |        |        |        | 100,00 |        |        |  |
|     |           |                  | 912 | 100,00 |        |        |        | 100,00 |        |        |        |        |  |
| 305 | A(100,00) | A(100,00)        | 913 |        |        | 100,00 |        |        |        | 100,00 |        |        |  |
|     |           |                  | 914 |        | 100,00 |        |        |        | 100,00 |        |        |        |  |
|     |           |                  | 915 |        |        | 100,00 |        | 0,37   |        | 99,63  |        |        |  |
| 306 | A(100,00) | A(100,00)        | 916 |        |        | 100,00 |        |        |        | 100,00 |        |        |  |
|     |           |                  | 917 |        | 100,00 |        |        |        | 100,00 |        |        |        |  |
|     |           |                  | 918 | 78,26  |        | 21,74  |        | 100,00 |        |        |        |        |  |
| 307 | K(100,00) | K(100,00)        | 919 | 100,00 |        |        |        | 100,00 |        |        |        |        |  |
|     |           |                  | 920 | 100,00 |        |        |        | 100,00 |        |        |        |        |  |
|     |           |                  | 921 |        |        | 100,00 |        |        |        | 100,00 |        |        |  |
| 308 | L(100,00) | L(100,00)        | 922 |        | 100,00 |        |        |        | 100,00 |        |        |        |  |
|     |           |                  | 923 |        |        |        | 100,00 |        |        |        | 100,00 |        |  |
|     |           |                  | 924 |        | 100,00 |        |        |        | 100,00 |        |        |        |  |
| 309 | Q(100,00) | Q(100,00)        | 925 |        | 100,00 |        |        |        | 100,00 |        |        |        |  |
|     |           |                  | 926 | 100,00 |        |        |        | 100,00 |        |        |        |        |  |
|     |           |                  | 927 |        |        | 100,00 |        |        |        | 100,00 |        |        |  |
| 310 | D(100,00) | D(100,00)        | 928 |        |        | 100,00 |        |        |        |        | 100,00 |        |  |
|     |           |                  | 929 | 100,00 |        |        |        | 100,00 |        |        |        |        |  |
|     |           |                  | 930 |        | 100,00 |        |        |        | 100,00 |        |        |        |  |
| 311 | C(100,00) | R(0,33) C(99,67) | 931 |        |        |        | 100,00 |        | 0,33   |        | 99,67  |        |  |
|     |           |                  | 932 |        |        | 100,00 |        |        |        | 100,00 |        |        |  |
|     |           |                  | 933 |        | 100,00 |        |        |        | 100,00 |        |        |        |  |
| 312 | T(100,00) | T(100,00)        | 934 | 100,00 |        |        |        | 100,00 |        |        |        |        |  |
|     |           |                  | 935 |        | 100,00 |        |        |        | 100,00 |        |        |        |  |
|     |           |                  | 936 | 100,00 |        |        |        | 100,00 |        |        |        |        |  |
| 313 | M(100,00) | M(100,00)        | 937 | 100,00 |        |        |        | 100,00 |        |        |        |        |  |
|     |           |                  | 938 |        |        |        | 100,00 |        |        |        | 100,00 |        |  |
|     |           |                  | 939 |        |        | 100,00 |        |        |        | 100,00 |        |        |  |
| 314 | L(100,00) | L(100,00)        | 940 |        | 100,00 |        |        |        | 100,00 |        |        |        |  |
|     |           |                  | 941 |        |        |        | 100,00 |        |        |        | 100,00 |        |  |
|     |           |                  | 942 |        | 100,00 |        |        |        | 100,00 |        |        |        |  |
| 315 | V(100,00) | V(100,00)        | 943 |        |        | 100,00 |        |        |        |        | 100,00 |        |  |
|     |           |                  | 944 |        |        |        | 100,00 |        |        |        | 100,00 |        |  |
|     |           |                  | 945 |        |        | 100,00 |        |        |        | 100,00 |        |        |  |
| 316 | C(100,00) | C(100,00)        | 946 |        |        |        | 100,00 |        |        |        |        | 100,00 |  |
|     |           |                  | 947 |        |        | 100,00 |        |        |        | 100,00 |        |        |  |
|     |           |                  | 948 |        | 100,00 |        |        |        | 100,00 |        |        |        |  |
| 317 | G(100,00) | G(100,00)        | 949 |        |        | 100,00 |        |        |        |        | 100,00 |        |  |
|     |           |                  | 950 |        |        | 100,00 |        |        |        | 100,00 |        |        |  |
|     |           |                  | 951 |        |        | 100,00 |        |        |        | 100,00 |        |        |  |
| 318 | D(100,00) | D(100,00)        | 952 |        |        | 100,00 |        |        |        |        | 100,00 |        |  |
|     |           |                  | 953 | 100,00 |        |        |        | 100,00 |        |        |        |        |  |
|     |           |                  | 954 |        | 100,00 |        |        |        | 100,00 |        |        |        |  |
| 319 | D(100,00) | D(100,00)        | 955 |        |        | 100,00 |        |        |        |        | 100,00 |        |  |
|     |           |                  | 956 | 100,00 |        |        |        | 100,00 |        |        |        |        |  |
|     |           |                  | 957 |        | 100,00 |        |        |        | 100,00 |        |        |        |  |
| 320 | L(100,00) | L(100,00)        | 958 |        | 100,00 |        |        |        | 100,00 |        |        |        |  |
|     |           |                  | 959 |        |        |        | 100,00 |        |        |        | 100,00 |        |  |
|     |           |                  | 960 |        | 0,70   |        | 99,30  |        | 100,00 |        |        |        |  |
| 321 | V(100,00) | V(100,00)        | 961 |        |        | 100,00 |        |        |        | 100,00 |        |        |  |

|     |           |           |      |        |        |        |        |  |        |        |        |
|-----|-----------|-----------|------|--------|--------|--------|--------|--|--------|--------|--------|
|     |           |           | 962  |        |        |        | 100,00 |  |        |        | 100,00 |
|     |           |           | 963  |        | 100,00 |        |        |  | 100,00 |        |        |
| 322 | V(100,00) | V(100,00) | 964  |        |        | 100,00 |        |  |        | 100,00 |        |
|     |           |           | 965  |        |        |        | 100,00 |  |        |        | 100,00 |
|     |           |           | 966  |        |        |        | 100,00 |  |        |        | 100,00 |
| 323 | I(100,00) | I(100,00) | 967  | 100,00 |        |        |        |  | 100,00 |        |        |
|     |           |           | 968  |        |        |        | 100,00 |  |        |        | 100,00 |
|     |           |           | 969  |        | 100,00 |        |        |  | 100,00 |        |        |
| 324 | C(100,00) | C(100,00) | 970  |        |        |        | 100,00 |  |        |        | 100,00 |
|     |           |           | 971  |        |        | 100,00 |        |  |        | 100,00 |        |
|     |           |           | 972  |        |        |        | 100,00 |  | 0,66   |        | 99,34  |
| 325 | E(100,00) | E(100,00) | 973  |        |        | 100,00 |        |  |        | 100,00 |        |
|     |           |           | 974  | 100,00 |        |        |        |  | 100,00 |        |        |
|     |           |           | 975  | 100,00 |        |        |        |  | 100,00 |        |        |
| 326 | S(100,00) | S(100,00) | 976  | 100,00 |        |        |        |  | 100,00 |        |        |
|     |           |           | 977  |        |        | 100,00 |        |  |        | 100,00 |        |
|     |           |           | 978  |        | 92,99  |        | 7,01   |  | 100,00 |        |        |
| 327 | A(100,00) | A(100,00) | 979  |        |        | 100,00 |        |  |        | 100,00 |        |
|     |           |           | 980  |        | 100,00 |        |        |  | 100,00 |        |        |
|     |           |           | 981  |        | 10,24  |        | 89,76  |  |        |        | 100,00 |
| 328 | G(100,00) | G(100,00) | 982  |        |        | 100,00 |        |  |        | 100,00 |        |
|     |           |           | 983  |        |        | 100,00 |        |  |        | 100,00 |        |
|     |           |           | 984  |        |        | 100,00 |        |  |        | 100,00 |        |
| 329 | T(100,00) | T(100,00) | 985  | 100,00 |        |        |        |  | 100,00 |        |        |
|     |           |           | 986  |        | 100,00 |        |        |  | 100,00 |        |        |
|     |           |           | 987  |        | 100,00 |        |        |  | 100,00 |        |        |
| 330 | Q(100,00) | Q(100,00) | 988  |        | 100,00 |        |        |  | 100,00 |        |        |
|     |           |           | 989  | 100,00 |        |        |        |  | 100,00 |        |        |
|     |           |           | 990  |        |        | 100,00 |        |  |        | 100,00 |        |
| 331 | E(100,00) | E(100,00) | 991  |        |        | 100,00 |        |  | 100,00 |        |        |
|     |           |           | 992  | 100,00 |        |        |        |  | 100,00 |        |        |
|     |           |           | 993  |        |        | 100,00 |        |  |        | 100,00 |        |
| 332 | D(100,00) | D(100,00) | 994  |        |        | 100,00 |        |  |        | 100,00 |        |
|     |           |           | 995  | 100,00 |        |        |        |  | 100,00 |        |        |
|     |           |           | 996  |        | 100,00 |        |        |  | 100,00 |        |        |
| 333 | A(100,00) | A(100,00) | 997  |        |        | 100,00 |        |  |        | 100,00 |        |
|     |           |           | 998  |        | 100,00 |        |        |  | 100,00 |        |        |
|     |           |           | 999  |        |        | 100,00 |        |  |        | 100,00 |        |
| 334 | A(100,00) | A(100,00) | 1000 |        |        | 100,00 |        |  |        | 100,00 |        |
|     |           |           | 1001 |        | 100,00 |        |        |  | 100,00 |        |        |
|     |           |           | 1002 | 1,40   |        | 98,60  |        |  |        | 100,00 |        |
