# Supplementary material for: Late Relapse and Reinfection in HCV Patients Treated with Direct-Acting Antiviral (DAA) Drugs
Source: MDPI journal article supplement (doi:10.3390/v13061151), 2021-06-16
Supplement: s1 [file s1]

**Table S2.** Frequency of substitutions in Pt2 with respect to a GT1a reference sequence (EF407457.1). The relevant amino acid and nucleotide changes between T0 and T1 are written in red.

| NS5B<br>aa<br>position | Pt2       |                     | NS5B<br>nt<br>position | T0 (1a) |        |        |        |   | Pt2     |        |        |        |        |
|------------------------|-----------|---------------------|------------------------|---------|--------|--------|--------|---|---------|--------|--------|--------|--------|
|                        | T0 (1a)   | T1 (1a)             |                        | T0 (1a) |        |        |        |   | T1 (1a) |        |        |        |        |
|                        |           |                     |                        | A       | C      | G      | T      | - | A       | C      | G      | T      | -      |
| 179                    | V(100,00) | V(100,00)           | 535                    |         |        | 100,00 |        |   |         |        | 100,00 |        |        |
|                        |           |                     | 536                    |         |        |        | 100,00 |   |         |        |        | 100,00 |        |
|                        |           |                     | 537                    |         |        |        | 100,00 |   |         |        |        | 100,00 |        |
| 180                    | S(100,00) | S(100,00)           | 538                    | 100,00  |        |        |        |   | 100,00  |        |        |        |        |
|                        |           |                     | 539                    |         |        | 100,00 |        |   |         |        | 100,00 |        |        |
|                        |           |                     | 540                    |         | 98,33  |        | 1,67   |   |         | 100,00 |        |        |        |
| 181                    | K(100,00) | K(100,00)           | 541                    | 100,00  |        |        |        |   | 100,00  |        |        |        |        |
|                        |           |                     | 542                    | 100,00  |        |        |        |   | 100,00  |        |        |        |        |
|                        |           |                     | 543                    | 100,00  |        |        |        |   |         |        | 100,00 |        |        |
| 182                    | L(100,00) | L(100,00)           | 544                    |         | 100,00 |        |        |   |         | 100,00 |        |        |        |
|                        |           |                     | 545                    |         |        |        | 100,00 |   |         |        |        | 100,00 |        |
|                        |           |                     | 546                    |         | 100,00 |        |        |   |         | 100,00 |        |        |        |
| 183                    | P(100,00) | P(100,00)           | 547                    |         | 100,00 |        |        |   |         | 100,00 |        |        |        |
|                        |           |                     | 548                    |         | 100,00 |        |        |   |         | 100,00 |        |        |        |
|                        |           |                     | 549                    |         | 100,00 |        |        |   |         | 100,00 |        |        |        |
| 184                    | P(100,00) | P(100,00)           | 550                    |         | 100,00 |        |        |   |         | 100,00 |        |        |        |
|                        |           |                     | 551                    |         | 100,00 |        |        |   |         | 100,00 |        |        |        |
|                        |           |                     | 552                    | 23,49   | 76,51  |        |        |   | 100,00  |        |        |        |        |
| 185                    | A(100,00) | A(100,00)           | 553                    |         |        | 100,00 |        |   |         |        | 100,00 |        |        |
|                        |           |                     | 554                    |         | 100,00 |        |        |   |         | 100,00 |        |        |        |
|                        |           |                     | 555                    |         | 100,00 |        |        |   |         | 99,79  |        | 0,21   |        |
| 186                    | V(100,00) | V(100,00)           | 556                    |         |        | 100,00 |        |   |         |        | 100,00 |        |        |
|                        |           |                     | 557                    |         |        |        | 100,00 |   |         |        |        | 100,00 |        |
|                        |           |                     | 558                    |         |        | 100,00 |        |   |         |        | 100,00 |        |        |
| 187                    | M(100,00) | M(99,72)<br>V(0,28) | 559                    | 100,00  |        |        |        |   | 99,72   |        | 0,28   |        |        |
|                        |           |                     | 560                    |         |        |        | 100,00 |   |         |        |        | 100,00 |        |
|                        |           |                     | 561                    |         |        | 100,00 |        |   |         |        | 100,00 |        |        |
| 188                    | G(100,00) | G(100,00)           | 562                    |         |        | 100,00 |        |   |         |        | 100,00 |        |        |
|                        |           |                     | 563                    |         |        | 100,00 |        |   |         |        | 100,00 |        |        |
|                        |           |                     | 564                    | 100,00  |        |        |        |   | 100,00  |        |        |        |        |
| 189                    | S(100,00) | S(100,00)           | 565                    | 100,00  |        |        |        |   | 100,00  |        |        |        |        |
|                        |           |                     | 566                    |         |        | 100,00 |        |   |         |        | 100,00 |        |        |
|                        |           |                     | 567                    |         | 100,00 |        |        |   |         | 100,00 |        |        |        |
| 190                    | S(100,00) | S(100,00)           | 568                    |         |        |        | 100,00 |   |         |        |        | 100,00 |        |
|                        |           |                     | 569                    |         | 100,00 |        |        |   |         | 100,00 |        |        |        |
|                        |           |                     | 570                    |         | 100,00 |        |        |   |         | 100,00 |        |        |        |
| 191                    | Y(100,00) | C(0,12)<br>Y(99,88) | 571                    |         |        |        | 100,00 |   |         |        |        |        | 100,00 |
|                        |           |                     | 572                    | 100,00  |        |        |        |   | 99,88   |        | 0,12   |        |        |
|                        |           |                     | 573                    |         | 100,00 |        |        |   |         | 100,00 |        |        |        |
| 192                    | G(100,00) | G(100,00)           | 574                    |         |        | 100,00 |        |   |         |        | 100,00 |        |        |
|                        |           |                     | 575                    |         |        | 100,00 |        |   |         |        | 100,00 |        |        |
|                        |           |                     | 576                    | 100,00  |        |        |        |   | 100,00  |        |        |        |        |
| 193                    | F(100,00) | L(0,25)<br>F(99,75) | 577                    |         |        |        | 100,00 |   |         | 0,25   |        | 99,75  |        |
|                        |           |                     | 578                    |         |        |        | 100,00 |   |         |        |        | 100,00 |        |
|                        |           |                     | 579                    |         | 100,00 |        |        |   |         | 100,00 |        |        |        |
| 194                    | Q(100,00) | Q(100,00)           | 580                    |         | 100,00 |        |        |   |         | 100,00 |        |        |        |
|                        |           |                     | 581                    | 100,00  |        |        |        |   |         |        |        |        |        |
|                        |           |                     | 582                    | 73,18   |        | 26,82  |        |   |         |        | 100,00 |        |        |
| 195                    | Y(100,00) | Y(100,00)           | 583                    |         |        |        | 100,00 |   |         |        |        |        | 100,00 |
|                        |           |                     | 584                    | 100,00  |        |        |        |   | 100,00  |        |        |        |        |
|                        |           |                     | 585                    |         | 100,00 |        |        |   |         | 100,00 |        |        |        |
| 196                    | S(100,00) | P(0,28)<br>S(99,72) | 586                    |         |        |        | 100,00 |   |         | 0,28   |        | 99,72  |        |
|                        |           |                     | 587                    |         | 100,00 |        |        |   |         | 100,00 |        |        |        |
|                        |           |                     | 588                    | 100,00  |        |        |        |   | 99,77   |        | 0,23   |        |        |

|     |                     |                     |     |        |        |        |        |        |        |        |        |
|-----|---------------------|---------------------|-----|--------|--------|--------|--------|--------|--------|--------|--------|
| 197 | P(100,00)           | P(100,00)           | 589 |        | 100,00 |        |        |        | 100,00 |        |        |
|     |                     |                     | 590 |        | 100,00 |        |        |        | 100,00 |        |        |
|     |                     |                     | 591 | 100,00 |        |        |        | 100,00 |        |        |        |
| 198 | G(100,00)           | G(100,00)           | 592 |        |        | 100,00 |        |        |        | 100,00 |        |
|     |                     |                     | 593 |        |        | 100,00 |        |        |        | 100,00 |        |
|     |                     |                     | 594 | 100,00 |        |        |        | 100,00 |        |        |        |
| 199 | Q(100,00)           | R(0,14)<br>Q(99,86) | 595 |        | 100,00 |        |        |        | 100,00 |        |        |
|     |                     |                     | 596 | 100,00 |        |        |        | 99,86  |        | 0,14   |        |
|     |                     |                     | 597 |        |        | 100,00 |        |        |        | 100,00 |        |
| 200 | R(100,00)           | R(100,00)           | 598 |        | 100,00 |        |        |        | 100,00 |        |        |
|     |                     |                     | 599 |        |        | 100,00 |        |        |        | 100,00 |        |
|     |                     |                     | 600 |        |        | 100,00 |        |        |        | 100,00 |        |
| 201 | V(100,00)           | A(0,18)<br>V(99,82) | 601 |        |        | 100,00 |        |        |        | 100,00 |        |
|     |                     |                     | 602 |        |        |        | 100,00 |        | 0,18   |        | 99,82  |
|     |                     |                     | 603 |        |        |        | 100,00 |        |        |        | 100,00 |
| 202 | E(100,00)           | E(100,00)           | 604 |        |        | 100,00 |        |        |        | 100,00 |        |
|     |                     |                     | 605 | 100,00 |        |        |        | 100,00 |        |        |        |
|     |                     |                     | 606 | 99,32  |        | 0,68   |        | 100,00 |        |        |        |
| 203 | F(100,00)           | F(100,00)           | 607 |        |        |        | 100,00 |        |        |        | 100,00 |
|     |                     |                     | 608 |        |        |        | 100,00 |        |        |        | 100,00 |
|     |                     |                     | 609 |        | 100,00 |        |        |        | 100,00 |        |        |
| 204 | L(100,00)           | L(100,00)           | 610 |        | 100,00 |        |        |        | 100,00 |        |        |
|     |                     |                     | 611 |        |        |        | 100,00 |        |        |        | 100,00 |
|     |                     |                     | 612 |        | 100,00 |        |        |        | 100,00 |        |        |
| 205 | V(100,00)           | A(0,16)<br>V(99,84) | 613 |        |        | 100,00 |        |        |        | 100,00 |        |
|     |                     |                     | 614 |        |        |        | 100,00 |        | 0,16   |        | 99,84  |
|     |                     |                     | 615 |        |        | 100,00 |        |        |        | 100,00 |        |
| 206 | Q(100,00)           | Q(100,00)           | 616 |        | 100,00 |        |        |        | 100,00 |        |        |
|     |                     |                     | 617 | 100,00 |        |        |        | 100,00 |        |        |        |
|     |                     |                     | 618 | 100,00 |        |        |        | 100,00 |        |        |        |
| 207 | A(100,00)           | A(100,00)           | 619 |        |        | 100,00 |        |        |        | 100,00 |        |
|     |                     |                     | 620 |        | 100,00 |        |        |        | 100,00 |        |        |
|     |                     |                     | 621 |        |        | 100,00 |        |        |        | 100,00 |        |
| 208 | W(100,00)           | W(100,00)           | 622 |        |        |        | 100,00 |        |        |        | 100,00 |
|     |                     |                     | 623 |        |        | 100,00 |        |        |        | 100,00 |        |
|     |                     |                     | 624 |        |        | 100,00 |        |        |        | 100,00 |        |
| 209 | R(0,68)<br>K(99,32) | K(100,00)           | 625 | 100,00 |        |        |        | 100,00 |        |        |        |
|     |                     |                     | 626 | 99,32  |        | 0,68   |        | 100,00 |        |        |        |
|     |                     |                     | 627 |        |        | 100,00 |        |        |        | 100,00 |        |
| 210 | S(100,00)           | S(100,00)           | 628 |        |        |        | 100,00 |        |        |        | 100,00 |
|     |                     |                     | 629 |        | 100,00 |        |        |        | 100,00 |        |        |
|     |                     |                     | 630 |        | 99,13  |        | 0,87   |        | 100,00 |        |        |
| 211 | K(100,00)           | K(100,00)           | 631 | 100,00 |        |        |        | 100,00 |        |        |        |
|     |                     |                     | 632 | 100,00 |        |        |        | 100,00 |        |        |        |
|     |                     |                     | 633 |        |        | 100,00 |        |        |        | 100,00 |        |
| 212 | K(100,00)           | K(100,00)           | 634 | 100,00 |        |        |        | 100,00 |        |        |        |
|     |                     |                     | 635 | 100,00 |        |        |        | 100,00 |        |        |        |
|     |                     |                     | 636 |        |        | 100,00 |        |        |        | 100,00 |        |
| 213 | T(100,00)           | A(0,18)<br>T(99,82) | 637 | 100,00 |        |        |        | 99,82  |        | 0,18   |        |
|     |                     |                     | 638 |        | 100,00 |        |        |        | 100,00 |        |        |
|     |                     |                     | 639 |        | 100,00 |        |        |        | 100,00 |        |        |
| 214 | P(100,00)           | P(100,00)           | 640 |        | 100,00 |        |        |        | 100,00 |        |        |
|     |                     |                     | 641 |        | 100,00 |        |        |        | 100,00 |        |        |
|     |                     |                     | 642 | 92,89  |        | 7,11   |        | 100,00 |        |        |        |
| 215 | M(100,00)           | M(100,00)           | 643 | 100,00 |        |        |        | 100,00 |        |        |        |
|     |                     |                     | 644 |        |        |        | 100,00 |        |        | 100,00 |        |
|     |                     |                     | 645 |        |        | 100,00 |        |        |        | 100,00 |        |
| 216 | G(100,00)           | G(100,00)           | 646 |        |        | 100,00 |        |        |        | 100,00 |        |
|     |                     |                     | 647 |        |        | 100,00 |        |        |        | 100,00 |        |
|     |                     |                     | 648 |        |        | 100,00 |        |        |        | 100,00 |        |
| 217 | F(100,00)           | F(100,00)           | 649 |        |        |        | 100,00 |        |        |        | 100,00 |
|     |                     |                     | 650 |        |        |        | 100,00 |        |        |        | 100,00 |

|     |           |                     |     |        |        |        |        |        |        |        |        |
|-----|-----------|---------------------|-----|--------|--------|--------|--------|--------|--------|--------|--------|
|     |           |                     | 651 |        | 100,00 |        |        |        | 100,00 |        |        |
|     |           |                     | 652 |        |        |        | 100,00 |        |        |        | 100,00 |
| 218 | S(100,00) | S(100,00)           | 653 |        | 100,00 |        |        |        | 100,00 |        |        |
|     |           |                     | 654 |        |        | 100,00 |        |        | 100,00 |        |        |
|     |           |                     | 655 |        |        |        | 100,00 |        |        |        | 99,88  |
| 219 | Y(100,00) | H(0,12)<br>Y(99,88) | 656 | 100,00 |        |        |        | 100,00 | 0,12   |        |        |
|     |           |                     | 657 |        |        |        | 100,00 |        |        |        | 100,00 |
|     |           |                     | 658 |        |        | 100,00 |        |        |        | 100,00 |        |
| 220 | D(100,00) | D(100,00)           | 659 | 100,00 |        |        |        | 100,00 |        |        |        |
|     |           |                     | 660 |        |        |        | 100,00 |        |        |        | 100,00 |
|     |           |                     | 661 | 100,00 |        |        |        | 100,00 |        |        |        |
| 221 | T(100,00) | T(100,00)           | 662 |        | 100,00 |        |        |        | 100,00 |        |        |
|     |           |                     | 663 |        | 100,00 |        |        |        | 100,00 |        |        |
|     |           |                     | 664 |        | 100,00 |        |        |        | 100,00 |        |        |
| 222 | R(100,00) | R(100,00)           | 665 |        |        | 100,00 |        |        |        | 100,00 |        |
|     |           |                     | 666 |        | 100,00 |        |        |        | 100,00 |        |        |
|     |           |                     | 667 |        |        |        | 100,00 |        |        |        | 100,00 |
| 223 | C(100,00) | C(100,00)           | 668 |        |        | 100,00 |        |        | 100,00 |        |        |
|     |           |                     | 669 |        |        |        | 100,00 |        |        |        | 100,00 |
|     |           |                     | 670 |        |        |        | 100,00 |        |        |        | 100,00 |
| 224 | F(100,00) | F(100,00)           | 671 |        |        |        | 100,00 |        |        |        | 100,00 |
|     |           |                     | 672 |        |        |        | 100,00 |        |        |        | 100,00 |
|     |           |                     | 673 |        |        | 100,00 |        |        |        | 100,00 |        |
| 225 | D(100,00) | D(100,00)           | 674 | 100,00 |        |        |        | 100,00 |        |        |        |
|     |           |                     | 675 |        | 100,00 |        |        |        | 100,00 |        |        |
|     |           |                     | 676 |        |        |        | 100,00 | 0,14   |        |        | 99,86  |
| 226 | S(100,00) | S(99,86)<br>T(0,14) | 677 |        | 100,00 |        |        |        | 100,00 |        |        |
|     |           |                     | 678 |        | 63,66  |        | 36,34  |        | 0,23   |        | 99,77  |
|     |           |                     | 679 | 100,00 |        |        |        | 100,00 |        |        |        |
| 227 | T(100,00) | T(100,00)           | 680 |        | 100,00 |        |        |        | 100,00 |        |        |
|     |           |                     | 681 | 100,00 |        |        |        | 99,63  |        | 0,37   |        |
|     |           |                     | 682 |        |        | 100,00 |        |        |        | 100,00 |        |
| 228 | V(100,00) | V(100,00)           | 683 |        |        |        | 100,00 |        |        |        | 100,00 |
|     |           |                     | 684 |        | 100,00 |        |        |        | 100,00 |        |        |
|     |           |                     | 685 | 100,00 |        |        |        | 99,84  |        | 0,16   |        |
| 229 | T(100,00) | A(0,16)<br>T(99,84) | 686 |        | 100,00 |        |        |        | 100,00 |        |        |
|     |           |                     | 687 |        |        |        | 100,00 |        | 0,12   |        | 99,88  |
|     |           |                     | 688 |        |        | 100,00 |        |        |        | 99,45  |        |
| 230 | E(100,00) | E(99,45)<br>X(0,55) | 689 | 100,00 |        |        |        | 99,45  |        |        |        |
|     |           |                     | 690 |        |        | 100,00 |        |        |        | 100,00 |        |
|     |           |                     | 691 | 100,00 |        |        |        | 100,00 |        |        |        |
| 231 | S(100,00) | S(100,00)           | 692 |        |        | 100,00 |        |        | 100,00 |        |        |
|     |           |                     | 693 |        | 97,59  |        | 2,41   |        | 99,68  |        | 0,32   |
|     |           |                     | 694 |        |        | 100,00 |        |        |        | 100,00 |        |
| 232 | D(100,00) | D(99,68)<br>G(0,32) | 695 | 100,00 |        |        |        | 99,68  |        | 0,32   |        |
|     |           |                     | 696 |        | 100,00 |        |        |        | 100,00 |        |        |
|     |           |                     | 697 | 100,00 |        |        |        | 100,00 |        |        |        |
| 233 | I(100,00) | I(100,00)           | 698 |        |        |        | 100,00 |        |        |        | 100,00 |
|     |           |                     | 699 |        | 100,00 |        |        |        | 100,00 |        |        |
|     |           |                     | 700 |        | 100,00 |        |        |        | 100,00 |        |        |
| 234 | R(100,00) | R(100,00)           | 701 |        |        | 100,00 |        |        |        | 100,00 |        |
|     |           |                     | 702 |        |        |        | 100,00 |        |        |        | 100,00 |
|     |           |                     | 703 | 100,00 |        |        |        | 100,00 |        |        |        |
| 235 | T(100,00) | T(100,00)           | 704 |        | 100,00 |        |        |        | 100,00 |        |        |
|     |           |                     | 705 |        |        | 100,00 |        | 0,14   |        | 99,86  |        |
|     |           |                     | 706 |        |        | 100,00 |        |        |        | 100,00 |        |
| 236 | E(100,00) | E(100,00)           | 707 | 100,00 |        |        |        | 100,00 |        |        |        |
|     |           |                     | 708 |        |        | 100,00 |        |        |        | 100,00 |        |
|     |           |                     | 709 |        |        | 100,00 |        |        |        | 100,00 |        |
| 237 | E(100,00) | E(100,00)           | 710 | 100,00 |        |        |        | 100,00 |        |        |        |
|     |           |                     | 711 |        |        | 100,00 |        |        |        | 100,00 |        |
| 238 | A(100,00) |                     | 712 |        |        | 100,00 |        | 0,14   |        | 99,86  |        |

|     |                     |                     |                   |        |        |        |        |                 |        |                |                  |
|-----|---------------------|---------------------|-------------------|--------|--------|--------|--------|-----------------|--------|----------------|------------------|
|     |                     | A(99,86)<br>T(0,14) | 713<br>714        | 100,00 |        |        |        | 100,00          |        |                |                  |
|     |                     |                     | 715<br>716<br>717 | 100,00 |        |        |        | 100,00          |        | 0,18           | 100,00<br>100,00 |
| 239 | I(100,00)           | I(99,82)<br>V(0,18) | 718<br>719<br>720 | 100,00 |        |        | 100,00 | 100,00          |        |                | 100,00           |
| 240 | Y(100,00)           | Y(100,00)           | 721<br>722<br>723 |        | 100,00 |        |        |                 | 100,00 |                |                  |
| 241 | Q(100,00)           | R(0,14)<br>Q(99,86) | 724<br>725<br>726 | 100,00 |        |        |        | 99,86<br>100,00 |        | 0,14           |                  |
| 242 | C(100,00)           | C(100,00)           | 727<br>728<br>729 |        |        | 100,00 | 100,00 |                 |        | 100,00         | 100,00<br>100,00 |
| 243 | C(100,00)           | R(0,28)<br>C(99,72) | 730<br>731<br>732 |        |        |        |        |                 | 0,28   | 100,00         | 99,72<br>99,79   |
| 244 | D(100,00)           | D(99,84)<br>G(0,16) | 733<br>734<br>735 | 100,00 |        | 100,00 |        | 99,84           |        | 100,00<br>0,16 |                  |
| 245 | L(100,00)           | L(100,00)           | 736<br>737<br>738 |        | 100,00 |        |        |                 | 100,00 |                | 100,00           |
| 246 | D(100,00)           | D(100,00)           | 739<br>740<br>741 |        |        | 100,00 |        |                 |        | 100,00         |                  |
| 247 | P(100,00)           | P(100,00)           | 742<br>743<br>744 |        | 100,00 |        |        |                 | 100,00 |                |                  |
| 248 | Q(100,00)           | Q(100,00)           | 745<br>746<br>747 | 100,00 |        |        |        | 100,00          |        |                |                  |
| 249 | A(100,00)           | A(100,00)           | 748<br>749<br>750 |        | 100,00 | 100,00 |        |                 | 100,00 | 100,00         |                  |
| 250 | R(100,00)           | R(100,00)           | 751<br>752<br>753 | 0,74   |        | 99,26  |        |                 |        | 100,00         | 100,00           |
| 251 | M(0,74)<br>V(99,26) | V(100,00)           | 754<br>755<br>756 |        | 100,00 | 100,00 |        |                 | 100,00 | 100,00         |                  |
| 252 | A(100,00)           | A(100,00)           | 757<br>758<br>759 | 100,00 |        |        | 100,00 | 100,00          |        |                | 99,84            |
| 253 | I(100,00)           | I(99,84)<br>T(0,16) | 760<br>761<br>762 | 100,00 |        |        |        | 100,00          | 0,16   |                |                  |
| 254 | K(100,00)           | K(100,00)           | 763<br>764<br>765 |        | 100,00 |        | 100,00 |                 | 100,00 |                |                  |
| 255 | S(100,00)           | S(100,00)           | 766<br>767<br>768 |        |        |        |        |                 |        |                | 100,00           |
| 256 | L(100,00)           | L(100,00)           | 769<br>770<br>771 | 100,00 | 100,00 |        |        | 99,86           |        | 0,14           |                  |
| 257 | T(100,00)           | A(0,14)<br>T(99,86) | 772<br>773<br>774 |        |        | 100,00 |        |                 |        | 100,00         | 100,00           |
| 258 | E(100,00)           | E(100,00)           |                   | 100,00 |        |        |        | 100,00          |        |                |                  |

|     |           |                     |     |        |        |        |        |        |        |        |        |
|-----|-----------|---------------------|-----|--------|--------|--------|--------|--------|--------|--------|--------|
| 259 | R(100,00) | R(100,00)           | 775 | 100,00 |        |        |        | 100,00 |        |        |        |
|     |           |                     | 776 |        |        | 100,00 |        |        |        | 100,00 |        |
|     |           |                     | 777 |        |        | 100,00 |        |        |        | 100,00 |        |
| 260 | L(100,00) | L(100,00)           | 778 |        | 100,00 |        |        |        | 100,00 |        |        |
|     |           |                     | 779 |        |        |        | 100,00 |        |        |        | 100,00 |
|     |           |                     | 780 |        |        |        | 100,00 |        |        |        | 100,00 |
| 261 | Y(100,00) | Y(100,00)           | 781 |        |        |        | 100,00 |        |        |        | 100,00 |
|     |           |                     | 782 | 100,00 |        |        |        | 100,00 |        |        |        |
|     |           |                     | 783 |        |        |        | 100,00 |        |        |        | 100,00 |
| 262 | V(100,00) | V(100,00)           | 784 |        |        | 100,00 |        |        |        | 100,00 |        |
|     |           |                     | 785 |        |        |        | 100,00 |        |        |        | 100,00 |
|     |           |                     | 786 |        | 41,66  |        | 58,34  |        | 100,00 |        |        |
| 263 | G(100,00) | G(100,00)           | 787 |        |        | 100,00 |        |        |        | 100,00 |        |
|     |           |                     | 788 |        |        | 100,00 |        |        |        | 100,00 |        |
|     |           |                     | 789 |        |        | 100,00 |        |        |        | 100,00 |        |
| 264 | G(100,00) | G(100,00)           | 790 |        |        | 100,00 |        |        |        | 100,00 |        |
|     |           |                     | 791 |        |        | 100,00 |        |        |        | 100,00 |        |
|     |           |                     | 792 |        | 100,00 |        |        |        | 100,00 |        |        |
| 265 | P(100,00) | P(100,00)           | 793 |        | 100,00 |        |        |        | 100,00 |        |        |
|     |           |                     | 794 |        | 100,00 |        |        |        | 100,00 |        |        |
|     |           |                     | 795 |        |        |        | 100,00 |        |        |        | 100,00 |
| 266 | L(100,00) | L(100,00)           | 796 |        | 100,00 |        |        |        | 100,00 |        |        |
|     |           |                     | 797 |        |        |        | 100,00 |        |        |        | 100,00 |
|     |           |                     | 798 |        | 41,66  |        | 58,34  |        | 100,00 |        |        |
| 267 | T(100,00) | T(100,00)           | 799 | 100,00 |        |        |        | 100,00 |        |        |        |
|     |           |                     | 800 |        | 100,00 |        |        |        | 100,00 |        |        |
|     |           |                     | 801 |        | 100,00 |        |        |        | 100,00 |        |        |
| 268 | N(100,00) | N(100,00)           | 802 | 100,00 |        |        |        | 100,00 |        |        |        |
|     |           |                     | 803 | 100,00 |        |        |        | 100,00 |        |        |        |
|     |           |                     | 804 |        |        |        | 100,00 |        | 0,21   |        | 99,79  |
| 269 | S(100,00) | S(100,00)           | 805 |        |        |        | 100,00 |        |        |        | 100,00 |
|     |           |                     | 806 |        | 100,00 |        |        |        | 100,00 |        |        |
|     |           |                     | 807 | 100,00 |        |        |        | 100,00 |        |        |        |
| 270 | R(100,00) | R(100,00)           | 808 | 100,00 |        |        |        | 100,00 |        |        |        |
|     |           |                     | 809 |        |        | 100,00 |        |        |        | 100,00 |        |
|     |           |                     | 810 |        |        | 100,00 |        |        |        | 100,00 |        |
| 271 | G(100,00) | G(100,00)           | 811 |        |        | 100,00 |        |        |        | 100,00 |        |
|     |           |                     | 812 |        |        | 100,00 |        |        |        | 100,00 |        |
|     |           |                     | 813 |        |        | 100,00 |        |        |        | 100,00 |        |
| 272 | E(100,00) | E(100,00)           | 814 |        |        | 100,00 |        |        |        | 100,00 |        |
|     |           |                     | 815 | 100,00 |        |        |        | 100,00 |        |        |        |
|     |           |                     | 816 |        |        | 100,00 |        |        |        | 100,00 |        |
| 273 | N(100,00) | N(99,77)<br>H(0,23) | 817 | 100,00 |        |        |        | 99,77  | 0,23   |        |        |
|     |           |                     | 818 | 100,00 |        |        |        | 100,00 |        |        |        |
|     |           |                     | 819 |        | 100,00 |        |        |        | 100,00 |        |        |
| 274 | C(100,00) | C(100,00)           | 820 |        |        |        | 100,00 |        |        |        | 100,00 |
|     |           |                     | 821 |        |        | 100,00 |        |        |        | 100,00 |        |
|     |           |                     | 822 |        | 100,00 |        |        |        | 100,00 |        |        |
| 275 | G(100,00) | G(100,00)           | 823 |        |        | 100,00 |        |        |        | 100,00 |        |
|     |           |                     | 824 |        |        | 100,00 |        |        |        | 100,00 |        |
|     |           |                     | 825 |        | 100,00 |        |        |        | 100,00 |        |        |
| 276 | Y(100,00) | Y(100,00)           | 826 |        |        |        | 100,00 |        |        |        | 100,00 |
|     |           |                     | 827 | 100,00 |        |        |        | 100,00 |        |        |        |
|     |           |                     | 828 |        | 100,00 |        |        |        | 99,88  |        | 0,12   |
| 277 | R(100,00) | R(99,88)<br>C(0,12) | 829 |        | 100,00 |        |        |        | 99,88  |        | 0,12   |
|     |           |                     | 830 |        |        | 100,00 |        |        |        | 100,00 |        |
|     |           |                     | 831 |        | 100,00 |        |        |        | 100,00 |        |        |
| 278 | R(100,00) | R(100,00)           | 832 | 100,00 |        |        |        | 100,00 |        |        |        |
|     |           |                     | 833 |        |        | 100,00 |        |        |        | 100,00 |        |
|     |           |                     | 834 |        |        | 100,00 |        |        |        | 100,00 |        |
| 279 | C(100,00) | C(100,00)           | 835 |        |        |        | 100,00 |        |        |        | 100,00 |
|     |           |                     | 836 |        |        | 100,00 |        |        |        | 100,00 |        |

|     |           |                                |     |        |        |        |        |        |        |        |        |
|-----|-----------|--------------------------------|-----|--------|--------|--------|--------|--------|--------|--------|--------|
|     |           |                                | 837 |        | 100,00 |        |        |        | 100,00 |        |        |
| 280 | R(100,00) | R(99,70)<br>H(0,30)            | 838 |        | 100,00 |        |        |        | 100,00 |        |        |
|     |           |                                | 839 |        |        | 100,00 |        | 0,30   |        | 99,70  |        |
|     |           |                                | 840 |        | 100,00 |        |        |        | 100,00 |        |        |
|     |           |                                |     |        |        |        |        |        |        |        |        |
| 281 | A(100,00) | A(100,00)                      | 841 |        |        | 100,00 |        |        |        | 100,00 |        |
|     |           |                                | 842 |        | 100,00 |        |        |        | 100,00 |        |        |
|     |           |                                | 843 | 0,37   | 47,84  | 51,79  |        |        | 100,00 |        |        |
|     |           |                                |     |        |        |        |        |        |        |        |        |
| 282 | S(100,00) | S(100,00)                      | 844 | 100,00 |        |        |        | 100,00 |        |        |        |
|     |           |                                | 845 |        |        | 100,00 |        |        |        | 100,00 |        |
|     |           |                                | 846 |        | 100,00 |        |        |        | 100,00 |        |        |
|     |           |                                |     |        |        |        |        |        |        |        |        |
| 283 | G(100,00) | G(100,00)                      | 847 |        |        | 100,00 |        |        |        | 100,00 |        |
|     |           |                                | 848 |        |        | 100,00 |        |        |        | 100,00 |        |
|     |           |                                | 849 |        | 100,00 |        |        |        | 100,00 |        |        |
|     |           |                                |     |        |        |        |        |        |        |        |        |
| 284 | V(100,00) | V(100,00)                      | 850 |        |        | 100,00 |        |        |        | 100,00 |        |
|     |           |                                | 851 |        |        |        | 100,00 |        |        |        | 100,00 |
|     |           |                                | 852 | 100,00 |        |        |        | 100,00 |        |        |        |
|     |           |                                |     |        |        |        |        |        |        |        |        |
| 285 | L(100,00) | L(100,00)                      | 853 |        | 100,00 |        |        |        | 100,00 |        |        |
|     |           |                                | 854 |        |        |        | 100,00 |        |        |        | 100,00 |
|     |           |                                | 855 |        |        | 100,00 |        |        |        | 100,00 |        |
|     |           |                                |     |        |        |        |        |        |        |        |        |
| 286 | T(100,00) | A(0,12)<br>T(99,88)            | 856 | 100,00 |        |        |        | 99,88  |        | 0,12   |        |
|     |           |                                | 857 |        | 100,00 |        |        |        | 100,00 |        |        |
|     |           |                                | 858 | 99,63  |        | 0,37   |        | 99,75  |        | 0,25   |        |
|     |           |                                |     |        |        |        |        |        |        |        |        |
| 287 | T(100,00) | A(0,55)<br>T(99,45)            | 859 | 100,00 |        |        |        | 99,45  |        | 0,55   |        |
|     |           |                                | 860 |        | 100,00 |        |        |        | 100,00 |        |        |
|     |           |                                | 861 |        | 1,30   |        | 98,70  |        |        |        | 100,00 |
|     |           |                                |     |        |        |        |        |        |        |        |        |
| 288 | S(100,00) | S(100,00)                      | 862 | 100,00 |        |        |        | 100,00 |        |        |        |
|     |           |                                | 863 |        |        | 100,00 |        |        |        | 100,00 |        |
|     |           |                                | 864 |        | 100,00 |        |        |        | 100,00 |        |        |
|     |           |                                |     |        |        |        |        |        |        |        |        |
| 289 | C(100,00) | R(0,16)<br>C(99,84)            | 865 |        |        |        | 100,00 |        | 0,16   |        | 99,84  |
|     |           |                                | 866 |        |        | 100,00 |        |        |        | 100,00 |        |
|     |           |                                | 867 |        |        |        | 100,00 |        |        |        | 100,00 |
|     |           |                                |     |        |        |        |        |        |        |        |        |
| 290 | G(100,00) | G(100,00)                      | 868 |        |        | 100,00 |        |        |        | 100,00 |        |
|     |           |                                | 869 |        |        | 100,00 |        |        |        | 100,00 |        |
|     |           |                                | 870 |        |        |        | 100,00 |        |        |        | 100,00 |
|     |           |                                |     |        |        |        |        |        |        |        |        |
| 291 | N(100,00) | N(95,96)<br>D(3,72)<br>S(0,32) | 871 | 100,00 |        |        |        | 96,29  |        | 3,71   |        |
|     |           |                                | 872 | 100,00 |        |        |        | 99,68  |        | 0,32   |        |
|     |           |                                | 873 |        | 98,70  |        | 1,30   |        | 100,00 |        |        |
|     |           |                                |     |        |        |        |        |        |        |        |        |
| 292 | T(100,00) | T(100,00)                      | 874 | 100,00 |        |        |        | 100,00 |        |        |        |
|     |           |                                | 875 |        | 100,00 |        |        |        | 100,00 |        |        |
|     |           |                                | 876 |        | 100,00 |        |        |        | 100,00 |        |        |
|     |           |                                |     |        |        |        |        |        |        |        |        |
| 293 | L(100,00) | L(100,00)                      | 877 |        | 100,00 |        |        |        | 100,00 |        |        |
|     |           |                                | 878 |        |        |        | 100,00 |        |        |        | 100,00 |
|     |           |                                | 879 |        | 100,00 |        |        |        | 100,00 |        |        |
|     |           |                                |     |        |        |        |        |        |        |        |        |
| 294 | T(100,00) | W(100,00)                      | 880 | 100,00 |        |        |        | 100,00 |        |        |        |
|     |           |                                | 881 |        | 100,00 |        |        |        | 100,00 |        |        |
|     |           |                                | 882 |        |        |        | 100,00 |        |        |        | 100,00 |
|     |           |                                |     |        |        |        |        |        |        |        |        |
| 295 | C(100,00) | R(0,23)<br>C(99,77)            | 883 |        |        |        | 100,00 |        | 0,23   |        | 99,77  |
|     |           |                                | 884 |        |        |        |        |        |        | 100,00 |        |
|     |           |                                | 885 |        | 44,68  |        | 55,32  |        | 100,00 |        |        |
|     |           |                                |     |        |        |        |        |        |        |        |        |
| 296 | Y(100,00) | C(0,12)<br>Y(99,88)            | 886 |        |        |        | 100,00 |        |        |        | 100,00 |
|     |           |                                | 887 | 100,00 |        |        |        | 99,88  |        | 0,12   |        |
|     |           |                                | 888 |        | 100,00 |        |        |        | 100,00 |        |        |
|     |           |                                |     |        |        |        |        |        |        |        |        |
| 297 | I(100,00) | I(99,70)<br>V(0,30)            | 889 | 100,00 |        |        |        | 99,70  |        | 0,30   |        |
|     |           |                                | 890 |        |        |        | 100,00 |        |        |        | 100,00 |
|     |           |                                | 891 |        | 100,00 |        |        |        | 100,00 |        |        |
|     |           |                                |     |        |        |        |        |        |        |        |        |
| 298 | K(100,00) | E(0,12)<br>K(99,88)            | 892 | 100,00 |        |        |        | 99,88  |        | 0,12   |        |
|     |           |                                | 893 | 100,00 |        |        |        | 100,00 |        |        |        |
|     |           |                                | 894 |        |        | 100,00 |        |        |        | 100,00 |        |
|     |           |                                |     |        |        |        |        |        |        |        |        |
| 299 | A(100,00) | A(100,00)                      | 895 |        |        | 100,00 |        |        |        | 100,00 |        |
|     |           |                                | 896 |        | 100,00 |        |        |        | 100,00 |        |        |
|     |           |                                | 897 |        | 100,00 |        |        |        | 100,00 |        |        |
|     |           |                                |     |        |        |        |        |        |        |        |        |
| 300 |           | R(100,00)                      | 898 |        | 100,00 |        |        |        | 100,00 |        |        |

|     |           |                      |                   |            |                |        |                            |                 |        |        |                            |        |
|-----|-----------|----------------------|-------------------|------------|----------------|--------|----------------------------|-----------------|--------|--------|----------------------------|--------|
|     |           | R(44,99)<br>Q(55,01) |                   | 899<br>900 | 55,01<br>99,63 |        | 44,99<br>0,37              |                 | 99,86  |        | 100,00<br>0,14             |        |
| 301 | A(100,00) | A(99,88)<br>V(0,12)  | 901<br>902<br>903 |            | 100,00         |        | 100,00                     |                 |        | 99,88  | 100,00                     | 0,12   |
| 302 | A(100,00) | A(100,00)            | 904<br>905<br>906 |            | 100,00         |        | 100,00                     |                 |        | 100,00 | 100,00                     |        |
| 303 | C(100,00) | C(100,00)            | 907<br>908<br>909 |            |                |        | 100,00                     | 100,00          |        |        | 100,00                     | 100,00 |
| 304 | R(100,00) | R(100,00)            | 910<br>911<br>912 |            | 100,00         |        | 100,00                     |                 |        | 100,00 | 100,00                     |        |
| 305 | A(100,00) | A(100,00)            | 913<br>914<br>915 |            |                |        | 100,00                     |                 |        | 100,00 | 100,00                     |        |
| 306 | A(100,00) | A(100,00)            | 916<br>917<br>918 |            | 100,00         |        | 100,00                     |                 |        | 100,00 | 100,00                     |        |
| 307 | G(100,00) | G(100,00)            | 919<br>920<br>921 |            |                |        | 100,00<br>100,00<br>100,00 |                 |        |        | 100,00<br>100,00<br>100,00 |        |
| 308 | L(100,00) | L(100,00)            | 922<br>923<br>924 |            | 100,00         |        |                            | 100,00          |        | 100,00 |                            | 100,00 |
| 309 | R(100,00) | R(100,00)            | 925<br>926<br>927 |            | 100,00         |        | 100,00                     |                 |        | 100,00 | 100,00                     |        |
| 310 | D(100,00) | D(100,00)            | 928<br>929<br>930 |            | 100,00         | 53,28  | 100,00                     | 46,72           |        | 100,00 | 100,00                     |        |
| 311 | C(100,00) | R(0,18)<br>C(99,82)  | 931<br>932<br>933 |            |                | 100,00 | 100,00                     | 100,00          |        | 0,18   | 100,00                     | 99,82  |
| 312 | T(100,00) | I(0,12)<br>T(99,88)  | 934<br>935<br>936 |            | 100,00         | 100,00 |                            |                 | 100,00 | 99,88  |                            | 0,12   |
| 313 | M(100,00) | M(100,00)            | 937<br>938<br>939 |            | 100,00         |        | 100,00                     | 100,00          |        |        | 100,00                     | 100,00 |
| 314 | L(100,00) | L(100,00)            | 940<br>941<br>942 |            | 100,00         |        |                            | 100,00          |        | 100,00 |                            | 100,00 |
| 315 | V(100,00) | A(0,21)<br>V(99,79)  | 943<br>944<br>945 |            |                |        | 100,00                     | 100,00          |        | 0,21   | 100,00                     | 99,79  |
| 316 | C(100,00) | R(0,42)<br>C(99,58)  | 946<br>947<br>948 |            |                |        | 100,00                     | 100,00          |        | 0,42   | 100,00                     | 99,58  |
| 317 | G(100,00) | D(0,14)<br>G(99,86)  | 949<br>950<br>951 |            |                | 100,00 | 100,00                     |                 | 0,14   |        | 100,00                     | 99,86  |
| 318 | D(100,00) | D(100,00)            | 952<br>953<br>954 |            | 100,00         | 100,00 | 100,00                     |                 |        | 99,88  | 100,00                     | 0,12   |
| 319 | D(100,00) | D(100,00)            | 955<br>956<br>957 |            | 100,00         | 100,00 | 100,00                     |                 |        | 100,00 | 100,00                     |        |
| 320 | L(100,00) | L(100,00)            | 958<br>959<br>960 |            |                | 45,49  |                            | 54,51<br>100,00 |        | 100,00 |                            | 100,00 |

|     |                                 |                     |      |        |        |        |        |        |        |        |        |
|-----|---------------------------------|---------------------|------|--------|--------|--------|--------|--------|--------|--------|--------|
| 321 | V(100,00)                       | V(100,00)           | 961  |        |        | 100,00 |        |        |        | 100,00 |        |
|     |                                 |                     | 962  |        |        |        | 100,00 |        |        |        | 100,00 |
|     |                                 |                     | 963  |        | 100,00 |        |        |        | 100,00 |        |        |
| 322 | V(100,00)                       | A(0,14)<br>V(99,86) | 964  |        |        | 100,00 |        |        |        | 100,00 |        |
|     |                                 |                     | 965  |        |        |        | 100,00 |        | 0,14   |        | 99,86  |
|     |                                 |                     | 966  |        |        |        | 100,00 |        |        |        | 100,00 |
| 323 | I(100,00)                       | I(99,82)<br>T(0,18) | 967  | 100,00 |        |        |        | 100,00 |        |        |        |
|     |                                 |                     | 968  |        |        |        | 100,00 |        | 0,18   |        | 99,82  |
|     |                                 |                     | 969  |        | 100,00 |        |        | 100,00 |        |        |        |
| 324 | C(100,00)                       | C(100,00)           | 970  |        |        |        | 100,00 |        |        | 100,00 |        |
|     |                                 |                     | 971  |        |        |        |        |        |        |        | 100,00 |
|     |                                 |                     | 972  |        | 3,89   |        | 96,11  |        |        |        | 100,00 |
| 325 | E(100,00)                       | E(100,00)           | 973  |        |        | 100,00 |        |        |        | 100,00 |        |
|     |                                 |                     | 974  | 100,00 |        |        |        | 100,00 |        |        |        |
|     |                                 |                     | 975  | 100,00 |        |        |        | 100,00 |        |        |        |
| 326 | S(100,00)                       | S(100,00)           | 976  | 100,00 |        |        |        | 100,00 |        |        |        |
|     |                                 |                     | 977  |        |        | 100,00 |        |        |        | 100,00 |        |
|     |                                 |                     | 978  |        |        |        | 100,00 |        | 0,12   |        | 99,88  |
| 327 | A(50,12)<br>Y(48,70)<br>X(1,18) | A(100,00)           | 979  |        |        | 98,83  |        |        |        | 100,00 |        |
|     |                                 |                     | 980  |        | 50,12  |        | 48,70  |        | 100,00 |        |        |
|     |                                 |                     | 981  |        |        | 98,83  |        |        |        | 100,00 |        |
| 328 | G(98,83)<br>X(1,17)             | G(100,00)           | 982  |        |        | 98,83  |        |        |        | 100,00 |        |
|     |                                 |                     | 983  |        |        | 98,83  |        |        |        | 100,00 |        |
|     |                                 |                     | 984  |        |        | 98,83  |        |        |        | 100,00 |        |
| 329 | V(100,00)                       | D(0,12)<br>V(99,88) | 985  |        |        | 100,00 |        |        |        | 100,00 |        |
|     |                                 |                     | 986  |        |        |        | 100,00 | 0,12   |        |        | 99,88  |
|     |                                 |                     | 987  |        | 99,26  |        | 0,74   | 100,00 |        |        |        |
| 330 | Q(100,00)                       | Q(100,00)           | 988  |        | 100,00 |        |        |        |        |        |        |
|     |                                 |                     | 989  | 100,00 |        |        |        | 100,00 |        |        |        |
|     |                                 |                     | 990  | 45,86  |        | 54,14  |        | 100,00 |        |        |        |
| 331 | E(100,00)                       | E(100,00)           | 991  |        |        | 100,00 |        |        |        | 100,00 |        |
|     |                                 |                     | 992  | 100,00 |        |        |        | 100,00 |        |        |        |
|     |                                 |                     | 993  |        |        | 100,00 |        |        |        | 100,00 |        |
| 332 | D(100,00)                       | D(100,00)           | 994  |        |        | 100,00 |        |        |        | 100,00 |        |
|     |                                 |                     | 995  | 100,00 |        |        |        | 100,00 |        |        |        |
|     |                                 |                     | 996  |        | 100,00 |        |        | 100,00 |        |        |        |
| 333 | A(100,00)                       | A(100,00)           | 997  |        |        | 100,00 |        |        |        | 100,00 |        |
|     |                                 |                     | 998  |        | 100,00 |        |        |        | 100,00 |        |        |
|     |                                 |                     | 999  | 3,89   |        | 96,11  |        | 0,18   |        | 99,82  |        |
| 334 | A(100,00)                       | A(100,00)           | 1000 |        |        | 100,00 |        |        |        | 100,00 |        |
|     |                                 |                     | 1001 |        | 100,00 |        |        |        | 100,00 |        |        |
|     |                                 |                     | 1002 | 53,77  |        | 46,23  |        | 100,00 |        |        |        |
