# Supplementary material for: Late Relapse and Reinfection in HCV Patients Treated with Direct-Acting Antiviral (DAA) Drugs
Source: MDPI journal article supplement (doi:10.3390/v13061151), 2021-06-16
Supplement: s1 [file s1]

**Table S3.** Frequency of substitutions in Pt3 with respect to a GT1a reference sequence (EF407457.1). The relevant amino acid and nucleotide changes between T0 and T1 are written in red.

| NS5B<br>aa<br>pos | Pt3                 |           |                             | NS5B<br>nt<br>pos | T0 (1a) |        |        |        |   | Pt3    |        |        |        |   | T2 (1a) |        |        |        |   |
|-------------------|---------------------|-----------|-----------------------------|-------------------|---------|--------|--------|--------|---|--------|--------|--------|--------|---|---------|--------|--------|--------|---|
|                   | T0 (1a)             | T1 (1a)   | T2 (1a)                     |                   | A       | C      | G      | T      | - | A      | C      | G      | T      | - | A       | C      | G      | T      | - |
| <b>179</b>        | V(100,00)           | V(100,00) | A(0,17)<br>V(99,83)         | <b>535</b>        |         |        | 100,00 |        |   |        |        | 100,00 |        |   |         |        | 100,00 |        |   |
|                   |                     |           |                             | <b>536</b>        |         |        |        | 100,00 |   |        |        |        | 100,00 |   |         | 0,17   |        | 99,83  |   |
|                   |                     |           |                             | <b>537</b>        |         | 100,00 |        |        |   |        |        |        | 100,00 |   |         |        |        | 100,00 |   |
| <b>180</b>        | S(100,00)           | S(100,00) | S(100,00)                   | <b>538</b>        | 100,00  |        |        |        |   | 100,00 |        |        |        |   | 100,00  |        |        |        |   |
|                   |                     |           |                             | <b>539</b>        |         |        | 100,00 |        |   |        |        | 100,00 |        |   |         |        | 100,00 |        |   |
|                   |                     |           |                             | <b>540</b>        |         | 100,00 |        |        |   |        | 100,00 |        |        |   |         | 100,00 |        |        |   |
| <b>181</b>        | K(100,00)           | K(100,00) | R(0,09) E(0,08)<br>K(99,83) | <b>541</b>        | 100,00  |        |        |        |   | 100,00 |        |        |        |   | 99,92   |        | 0,08   |        |   |
|                   |                     |           |                             | <b>542</b>        | 100,00  |        |        |        |   | 100,00 |        |        |        |   | 99,91   |        | 0,09   |        |   |
|                   |                     |           |                             | <b>543</b>        |         |        | 100,00 |        |   | 100,00 |        |        |        |   | 100,00  |        |        |        |   |
| <b>182</b>        | L(100,00)           | L(100,00) | L(100,00)                   | <b>544</b>        |         | 100,00 |        |        |   |        | 100,00 |        |        |   |         | 100,00 |        |        |   |
|                   |                     |           |                             | <b>545</b>        |         |        |        | 100,00 |   |        |        |        | 100,00 |   |         |        |        | 100,00 |   |
|                   |                     |           |                             | <b>546</b>        |         | 100,00 |        |        |   |        | 100,00 |        |        |   |         | 100,00 |        |        |   |
| <b>183</b>        | P(100,00)           | P(100,00) | P(100,00)                   | <b>547</b>        |         | 100,00 |        |        |   |        | 100,00 |        |        |   |         | 100,00 |        |        |   |
|                   |                     |           |                             | <b>548</b>        |         | 100,00 |        |        |   |        | 100,00 |        |        |   |         | 100,00 |        |        |   |
|                   |                     |           |                             | <b>549</b>        |         |        |        | 100,00 |   |        | 100,00 |        |        |   |         | 100,00 |        |        |   |
| <b>184</b>        | A(0,22)<br>V(99,78) | L(100,00) | L(100,00)                   | <b>550</b>        |         |        | 100,00 |        |   |        | 100,00 |        |        |   |         | 100,00 |        |        |   |
|                   |                     |           |                             | <b>551</b>        |         | 0,22   |        | 99,78  |   |        |        |        | 100,00 |   |         |        |        | 100,00 |   |
|                   |                     |           |                             | <b>552</b>        |         |        | 100,00 |        |   |        |        | 100,00 |        |   |         |        | 100,00 |        |   |
| <b>185</b>        | A(100,00)           | A(100,00) | A(100,00)                   | <b>553</b>        |         |        | 100,00 |        |   |        |        | 100,00 |        |   |         | 100,00 |        |        |   |
|                   |                     |           |                             | <b>554</b>        |         | 100,00 |        |        |   |        | 100,00 |        |        |   |         | 100,00 |        |        |   |
|                   |                     |           |                             | <b>555</b>        |         | 100,00 |        |        |   |        | 100,00 |        |        |   |         | 100,00 |        |        |   |
| <b>186</b>        | V(100,00)           | V(100,00) | A(0,13) M(0,03)<br>V(99,84) | <b>556</b>        |         |        | 100,00 |        |   |        |        | 100,00 |        |   | 0,03    |        | 99,97  |        |   |
|                   |                     |           |                             | <b>557</b>        |         |        |        | 100,00 |   |        |        |        | 100,00 |   |         | 0,13   |        | 99,87  |   |
|                   |                     |           |                             | <b>558</b>        |         |        | 100,00 |        |   |        |        | 100,00 |        |   |         | 100,00 |        |        |   |
| <b>187</b>        | M(100,00)           | M(100,00) | M(99,97)<br>T(0,07)         | <b>559</b>        | 100,00  |        |        |        |   | 100,00 |        |        |        |   | 100,00  |        |        |        |   |
|                   |                     |           |                             | <b>560</b>        |         |        |        | 100,00 |   |        |        |        | 100,00 |   |         | 0,07   |        | 99,93  |   |
|                   |                     |           |                             | <b>561</b>        |         |        | 100,00 |        |   |        |        | 100,00 |        |   |         | 100,00 |        |        |   |
| <b>188</b>        | G(100,00)           | G(100,00) | G(100,00)                   | <b>562</b>        |         |        | 100,00 |        |   |        |        | 100,00 |        |   |         |        | 100,00 |        |   |
|                   |                     |           |                             | <b>563</b>        |         |        | 100,00 |        |   |        |        | 100,00 |        |   |         |        | 100,00 |        |   |
|                   |                     |           |                             | <b>564</b>        | 100,00  |        |        |        |   | 100,00 |        |        |        |   | 100,00  |        |        |        |   |
| <b>189</b>        | S(100,00)           | S(100,00) | S(100,00)                   | <b>565</b>        | 100,00  |        |        |        |   | 100,00 |        |        |        |   | 100,00  |        |        |        |   |
|                   |                     |           |                             | <b>566</b>        |         |        | 100,00 |        |   |        |        | 100,00 |        |   |         | 100,00 |        |        |   |
|                   |                     |           |                             | <b>567</b>        |         | 100,00 |        |        |   |        | 100,00 |        |        |   |         | 100,00 |        |        |   |
| <b>190</b>        | S(100,00)           | S(100,00) | S(99,97) T(0,03)            | <b>568</b>        |         |        |        | 100,00 |   |        |        |        | 100,00 |   | 0,03    |        |        | 99,97  |   |

|     |           |           |                             |     |        |        |        |        |        |        |  |        |        |        |        |        |
|-----|-----------|-----------|-----------------------------|-----|--------|--------|--------|--------|--------|--------|--|--------|--------|--------|--------|--------|
|     |           |           |                             | 569 |        | 100,00 |        |        |        | 100,00 |  |        |        | 100,00 |        |        |
|     |           |           |                             | 570 |        | 100,00 |        |        |        | 100,00 |  |        |        | 100,00 |        |        |
|     |           |           |                             | 571 |        |        |        | 100,00 |        |        |  | 100,00 |        |        |        | 100,00 |
| 191 | Y(100,00) | Y(100,00) | Y(100,00)                   | 572 | 100,00 |        |        |        | 100,00 |        |  |        | 100,00 |        |        |        |
|     |           |           |                             | 573 |        | 99,78  |        | 0,22   |        | 100,00 |  |        |        | 99,96  |        | 0,04   |
|     |           |           |                             | 574 |        |        |        |        |        |        |  |        |        |        |        |        |
| 192 | G(100,00) | G(100,00) | G(100,00)                   | 575 |        |        | 100,00 |        |        | 100,00 |  |        |        |        | 100,00 |        |
|     |           |           |                             | 576 | 100,00 |        |        |        |        | 100,00 |  |        |        | 100,00 |        |        |
|     |           |           |                             | 577 |        |        |        |        |        |        |  |        |        |        |        |        |
| 193 | F(100,00) | F(100,00) | F(100,00)                   | 578 |        |        |        | 100,00 |        |        |  | 100,00 |        |        |        | 100,00 |
|     |           |           |                             | 579 |        | 100,00 |        |        |        | 26,96  |  | 100,00 |        |        |        | 100,00 |
|     |           |           |                             | 580 |        |        |        |        |        |        |  |        |        |        |        |        |
| 194 | Q(100,00) | Q(100,00) | Q(100,00)                   | 581 | 100,00 |        |        |        |        | 100,00 |  |        |        | 100,00 |        |        |
|     |           |           |                             | 582 | 100,00 |        |        |        |        | 97,59  |  | 2,41   |        | 100,00 |        |        |
|     |           |           |                             | 583 |        |        |        | 100,00 |        |        |  |        |        |        |        | 100,00 |
| 195 | Y(100,00) | Y(100,00) | C(0,03)<br>Y(99,97)         | 584 | 100,00 |        |        |        |        | 100,00 |  |        |        | 99,97  |        | 0,03   |
|     |           |           |                             | 585 |        | 99,82  |        | 0,18   |        | 100,00 |  |        |        | 99,96  |        | 0,04   |
|     |           |           |                             | 586 |        |        |        | 100,00 |        |        |  |        |        |        |        |        |
| 196 | S(100,00) | S(100,00) | A(0,34) P(0,24)<br>S(99,42) | 587 |        | 100,00 |        |        |        |        |  | 100,00 |        | 0,24   | 0,34   | 99,42  |
|     |           |           |                             | 588 | 100,00 |        |        |        |        | 81,51  |  | 18,49  |        | 99,89  |        | 0,11   |
|     |           |           |                             | 589 |        | 100,00 |        |        |        |        |  |        |        |        |        |        |
| 197 | P(100,00) | P(100,00) | L(0,03) P(99,97)            | 590 |        | 100,00 |        |        |        | 100,00 |  |        |        | 100,00 |        | 0,03   |
|     |           |           |                             | 591 | 100,00 |        |        |        |        | 100,00 |  |        |        | 100,00 |        |        |
|     |           |           |                             | 592 |        |        | 100,00 |        |        |        |  |        |        |        |        |        |
| 198 | G(100,00) | G(100,00) | G(100,00)                   | 593 |        |        | 100,00 |        |        |        |  | 100,00 |        |        |        |        |
|     |           |           |                             | 594 | 100,00 |        |        |        |        | 100,00 |  |        |        | 100,00 |        |        |
|     |           |           |                             | 595 |        | 100,00 |        |        |        |        |  |        |        |        |        |        |
| 199 | Q(100,00) | Q(100,00) | R(0,09)<br>Q(99,91)         | 596 | 100,00 |        |        |        |        | 100,00 |  |        |        | 99,91  |        | 0,09   |
|     |           |           |                             | 597 |        |        | 100,00 |        |        | 0,59   |  | 99,41  |        |        | 100,00 |        |
|     |           |           |                             | 598 |        | 100,00 |        |        |        |        |  |        |        |        |        | 0,11   |
| 200 | R(100,00) | R(100,00) | R(99,89)<br>W(0,11)         | 599 |        |        | 100,00 |        |        |        |  | 100,00 |        |        | 100,00 |        |
|     |           |           |                             | 600 |        |        | 100,00 |        |        |        |  | 100,00 |        | 0,04   | 99,96  |        |
|     |           |           |                             | 601 |        |        | 100,00 |        |        |        |  | 100,00 |        |        | 100,00 |        |
| 201 | V(100,00) | V(100,00) | A(0,14)<br>V(99,86)         | 602 |        |        |        | 100,00 |        |        |  |        | 100,00 |        | 0,14   | 99,86  |
|     |           |           |                             | 603 |        |        |        | 100,00 |        |        |  |        | 100,00 |        | 0,10   | 99,90  |
|     |           |           |                             | 604 |        |        | 100,00 |        |        |        |  | 100,00 |        |        | 100,00 |        |
| 202 | E(100,00) | E(100,00) | E(100,00)                   | 605 | 100,00 |        |        |        |        | 100,00 |  |        |        | 100,00 |        |        |
|     |           |           |                             | 606 | 100,00 |        |        |        |        | 100,00 |  |        |        | 99,40  |        | 0,60   |
|     |           |           |                             | 607 |        |        |        | 100,00 |        |        |  |        | 100,00 |        | 0,12   | 99,88  |
| 203 | F(100,00) | F(100,00) | L(0,12) F(99,88)            | 608 |        |        |        | 100,00 |        |        |  |        | 100,00 |        |        | 100,00 |
|     |           |           |                             | 609 |        | 100,00 |        |        |        |        |  |        |        | 100,00 |        |        |
| 204 | L(100,00) | L(100,00) | L(100,00)                   | 610 |        | 100,00 |        |        |        | 100,00 |  |        |        | 100,00 |        |        |

|     |                     |           |                                |     |        |        |        |        |  |        |        |        |        |        |        |        |
|-----|---------------------|-----------|--------------------------------|-----|--------|--------|--------|--------|--|--------|--------|--------|--------|--------|--------|--------|
|     |                     |           |                                | 611 |        |        |        | 100,00 |  |        |        | 100,00 |        |        |        | 100,00 |
|     |                     |           |                                | 612 |        | 100,00 |        |        |  | 100,00 |        |        |        | 100,00 |        |        |
| 205 | V(100,00)           | V(100,00) | A(0,05) M(0,06)<br>V(99,89)    | 613 |        |        | 100,00 |        |  | 100,00 |        | 0,06   |        | 99,94  |        |        |
|     |                     |           |                                | 614 |        |        |        | 100,00 |  |        | 100,00 |        | 0,05   |        | 99,95  |        |
|     |                     |           |                                | 615 |        | 10,17  | 89,83  |        |  | 100,00 |        |        |        | 100,00 |        |        |
| 206 | R(100,00)           | Q(100,00) | Q(100,00)                      | 616 |        | 100,00 |        |        |  | 100,00 |        |        | 100,00 |        |        |        |
|     |                     |           |                                | 617 |        |        | 100,00 |        |  | 100,00 |        | 100,00 |        |        |        |        |
|     |                     |           |                                | 618 | 99,63  |        | 0,37   |        |  | 100,00 |        | 100,00 |        |        |        |        |
| 207 | A(99,82)<br>V(0,18) | A(100,00) | A(100,00)                      | 619 |        |        | 100,00 |        |  | 100,00 |        |        |        | 100,00 |        |        |
|     |                     |           |                                | 620 |        | 99,82  |        | 0,18   |  | 100,00 |        |        | 100,00 |        |        |        |
|     |                     |           |                                | 621 |        |        | 100,00 |        |  | 100,00 |        | 0,08   |        | 99,92  |        |        |
| 208 | W(100,00)           | W(100,00) | R(0,05)<br>W(99,92)<br>*(0,03) | 622 |        |        |        | 100,00 |  |        | 100,00 |        | 0,05   |        | 99,95  |        |
|     |                     |           |                                | 623 |        |        | 100,00 |        |  | 100,00 |        | 0,03   |        | 99,97  |        |        |
|     |                     |           |                                | 624 |        |        | 100,00 |        |  | 100,00 |        |        |        | 100,00 |        |        |
| 209 | K(100,00)           | K(100,00) | K(100,00)                      | 625 | 100,00 |        |        |        |  | 100,00 |        |        |        | 100,00 |        |        |
|     |                     |           |                                | 626 | 100,00 |        |        |        |  | 100,00 |        |        |        | 100,00 |        |        |
|     |                     |           |                                | 627 | 88,08  |        | 11,92  |        |  | 100,00 |        |        |        | 100,00 |        |        |
| 210 | S(100,00)           | S(100,00) | S(100,00)                      | 628 |        |        |        | 100,00 |  |        | 100,00 |        |        |        |        | 100,00 |
|     |                     |           |                                | 629 |        | 100,00 |        |        |  | 100,00 |        |        | 100,00 |        |        |        |
|     |                     |           |                                | 630 |        | 11,92  |        | 88,08  |  | 100,00 |        |        | 100,00 |        |        |        |
| 211 | K(100,00)           | K(100,00) | K(100,00)                      | 631 | 100,00 |        |        |        |  | 100,00 |        |        |        | 100,00 |        |        |
|     |                     |           |                                | 632 | 100,00 |        |        |        |  | 100,00 |        |        |        | 100,00 |        |        |
|     |                     |           |                                | 633 |        |        | 100,00 |        |  | 49,68  | 50,32  |        |        | 100,00 |        |        |
| 212 | K(99,78)<br>T(0,22) | R(100,00) | R(100,00)                      | 634 | 100,00 |        |        |        |  | 100,00 |        |        |        | 100,00 |        |        |
|     |                     |           |                                | 635 | 99,78  | 0,22   |        |        |  |        | 100,00 |        |        | 100,00 |        |        |
|     |                     |           |                                | 636 |        |        | 100,00 |        |  | 100,00 |        |        |        | 100,00 |        |        |
| 213 | A(0,22)<br>T(99,78) | T(100,00) | T(100,00)                      | 637 | 99,78  |        | 0,22   |        |  | 100,00 |        |        |        | 100,00 |        |        |
|     |                     |           |                                | 638 |        | 100,00 |        |        |  | 100,00 |        |        |        | 100,00 |        |        |
|     |                     |           |                                | 639 |        | 100,00 |        |        |  | 100,00 |        |        |        | 100,00 |        |        |
| 214 | P(100,00)           | P(100,00) | P(100,00)                      | 640 |        | 100,00 |        |        |  | 100,00 |        |        |        | 100,00 |        |        |
|     |                     |           |                                | 641 |        | 100,00 |        |        |  | 100,00 |        |        |        | 100,00 |        |        |
|     |                     |           |                                | 642 | 98,68  |        | 1,32   |        |  | 99,73  | 0,27   |        |        | 100,00 |        |        |
| 215 | M(100,00)           | M(100,00) | M(99,62)<br>V(0,38)            | 643 | 100,00 |        |        |        |  | 100,00 |        |        |        | 99,62  | 0,38   |        |
|     |                     |           |                                | 644 |        |        |        | 100,00 |  |        | 100,00 |        |        |        | 100,00 | 100,00 |
|     |                     |           |                                | 645 |        |        | 100,00 |        |  | 100,00 |        |        |        |        | 100,00 |        |
| 216 | G(100,00)           | G(100,00) | G(100,00)                      | 646 |        |        | 100,00 |        |  | 100,00 |        |        |        | 100,00 |        |        |
|     |                     |           |                                | 647 |        |        | 100,00 |        |  | 100,00 |        |        |        | 100,00 |        |        |
|     |                     |           |                                | 648 |        |        | 100,00 |        |  | 100,00 |        |        |        | 100,00 |        |        |
| 217 | F(100,00)           | F(100,00) | L(0,08) F(99,92)               | 649 |        |        |        | 100,00 |  |        | 100,00 |        | 0,08   |        | 99,92  |        |
|     |                     |           |                                | 650 |        |        |        | 100,00 |  |        | 100,00 |        |        |        | 100,00 |        |
|     |                     |           |                                | 651 |        |        |        | 100,00 |  | 100,00 |        |        | 100,00 |        |        |        |
| 218 | S(100,00)           | S(100,00) | S(100,00)                      | 652 |        |        |        | 100,00 |  |        | 100,00 |        |        |        |        | 100,00 |

|     |                     |           |                                        |     |        |        |        |        |        |        |        |        |        |        |        |        |
|-----|---------------------|-----------|----------------------------------------|-----|--------|--------|--------|--------|--------|--------|--------|--------|--------|--------|--------|--------|
|     |                     |           |                                        | 653 |        | 100,00 |        |        |        | 100,00 |        |        |        | 100,00 |        |        |
|     |                     |           |                                        | 654 | 99,49  |        | 0,51   |        |        |        | 100,00 |        | 0,29   |        | 99,71  |        |
| 219 | Y(100,00)           | Y(100,00) | H(0,07)<br>Y(99,93)                    | 655 |        |        |        | 100,00 |        |        | 100,00 |        | 0,07   |        |        | 99,93  |
|     |                     |           |                                        | 656 | 100,00 |        |        |        | 100,00 |        |        | 100,00 |        |        |        |        |
|     |                     |           |                                        | 657 |        | 0,22   |        | 99,78  |        |        |        | 100,00 |        | 0,07   |        | 99,93  |
| 220 | D(100,00)           | D(100,00) | N(0,03)<br>D(99,88)<br>G(0,09)         | 658 |        |        | 100,00 |        |        | 100,00 |        |        | 0,03   |        | 99,97  |        |
|     |                     |           |                                        | 659 | 100,00 |        |        |        | 100,00 |        |        |        | 99,91  |        | 0,09   |        |
|     |                     |           |                                        | 660 |        | 0,80   |        | 99,20  |        |        | 100,00 |        |        | 41,62  |        | 58,38  |
| 221 | A(0,22)<br>T(99,78) | T(100,00) | A(0,14)<br>T(99,86)                    | 661 | 99,78  |        | 0,22   |        | 100,00 |        |        |        | 99,86  |        | 0,14   |        |
|     |                     |           |                                        | 662 |        | 100,00 |        |        |        | 100,00 |        |        |        | 100,00 |        |        |
|     |                     |           |                                        | 663 |        | 99,41  |        | 0,59   |        | 100,00 |        |        |        | 100,00 |        |        |
| 222 | R(100,00)           | R(100,00) | R(99,95)<br>H(0,05)                    | 664 |        | 100,00 |        |        |        | 100,00 |        |        |        | 100,00 |        |        |
|     |                     |           |                                        | 665 |        |        | 100,00 |        |        |        | 100,00 |        | 0,05   |        | 99,95  |        |
|     |                     |           |                                        | 666 |        | 99,78  |        | 0,22   |        | 100,00 |        |        |        | 100,00 |        |        |
| 223 | C(99,82)<br>*(0,18) | C(100,00) | C(100,00)                              | 667 |        |        |        | 100,00 |        |        | 100,00 |        |        |        |        | 100,00 |
|     |                     |           |                                        | 668 |        |        | 100,00 |        |        |        | 100,00 |        |        |        | 100,00 |        |
|     |                     |           |                                        | 669 | 0,18   | 99,82  |        |        |        |        |        | 100,00 |        |        |        | 100,00 |
| 224 | F(100,00)           | F(100,00) | F(100,00)                              | 670 |        |        |        | 100,00 |        |        |        | 100,00 |        |        |        | 100,00 |
|     |                     |           |                                        | 671 |        |        |        | 100,00 |        |        |        | 100,00 |        |        |        | 100,00 |
|     |                     |           |                                        | 672 |        |        |        | 100,00 |        |        |        | 100,00 |        |        |        | 100,00 |
| 225 | D(100,00)           | D(100,00) | D(99,83)<br>G(0,17)                    | 673 |        |        | 100,00 |        |        | 100,00 |        |        |        |        | 100,00 |        |
|     |                     |           |                                        | 674 | 100,00 |        |        |        | 100,00 |        |        |        | 99,83  |        | 0,17   |        |
|     |                     |           |                                        | 675 |        | 99,49  |        | 0,51   |        | 100,00 |        |        |        | 100,00 |        |        |
| 226 | S(100,00)           | S(100,00) | S(100,00)                              | 676 |        |        |        | 100,00 |        |        | 100,00 |        |        |        |        | 100,00 |
|     |                     |           |                                        | 677 |        | 100,00 |        |        |        | 100,00 |        |        |        | 100,00 |        |        |
|     |                     |           |                                        | 678 |        | 100,00 |        |        |        | 100,00 |        |        |        | 100,00 |        |        |
| 227 | T(100,00)           | T(100,00) | A(0,14)<br>T(99,86)                    | 679 | 100,00 |        |        |        | 100,00 |        |        |        | 99,86  |        | 0,14   |        |
|     |                     |           |                                        | 680 |        | 100,00 |        |        |        | 100,00 |        |        |        | 100,00 |        |        |
|     |                     |           |                                        | 681 | 99,74  |        | 0,26   |        | 100,00 |        |        |        | 99,38  |        | 0,07   | 0,55   |
| 228 | A(0,18)<br>V(99,82) | V(100,00) | A(0,15)<br>V(99,85)                    | 682 |        |        | 100,00 |        |        | 100,00 |        |        |        |        | 100,00 |        |
|     |                     |           |                                        | 683 |        | 0,18   |        | 99,82  |        |        | 100,00 |        |        | 0,15   |        | 99,85  |
|     |                     |           |                                        | 684 |        | 100,00 |        |        |        | 100,00 |        |        |        | 100,00 |        |        |
| 229 | T(100,00)           | T(100,00) | A(0,13)<br>T(99,87)                    | 685 | 100,00 |        |        |        | 100,00 |        |        |        | 99,87  |        | 0,13   |        |
|     |                     |           |                                        | 686 |        | 100,00 |        |        |        | 100,00 |        |        |        | 100,00 |        |        |
|     |                     |           |                                        | 687 |        | 0,33   |        | 99,67  |        |        | 100,00 |        | 0,03   | 0,07   |        | 99,91  |
| 230 | E(99,16)<br>X(0,84) | E(100,00) | E(99,70)<br>K(0,03) V(0,05)<br>X(0,22) | 688 |        |        | 99,16  |        |        | 100,00 |        |        | 0,04   |        | 99,75  |        |
|     |                     |           |                                        | 689 | 99,16  |        |        |        | 100,00 |        |        |        | 99,73  |        |        | 0,05   |
|     |                     |           |                                        | 690 |        |        | 100,00 |        |        | 100,00 |        |        |        |        | 100,00 |        |
| 231 | S(100,00)           | P(100,00) | S(100,00)                              | 691 | 100,00 |        |        |        | 100,00 |        |        |        | 100,00 |        |        |        |
|     |                     |           |                                        | 692 |        |        | 100,00 |        |        | 100,00 |        |        |        |        | 100,00 |        |
|     |                     |           |                                        | 693 |        | 1,68   |        | 98,32  |        | 100,00 |        |        |        | 99,96  |        | 0,04   |
| 232 |                     | D(100,00) | D(99,83)G(0,17)                        | 694 |        |        | 100,00 |        |        | 100,00 |        |        |        |        | 100,00 |        |

|     |                     |           |                                        |            |                |              |                  |        |        |                |              |       |
|-----|---------------------|-----------|----------------------------------------|------------|----------------|--------------|------------------|--------|--------|----------------|--------------|-------|
|     | D(99,78)<br>G(0,22) |           |                                        | 695<br>696 | 99,78<br>99,52 | 0,22<br>0,48 | 100,00<br>100,00 |        |        | 99,83<br>99,58 | 0,17<br>0,42 |       |
| 233 | I(100,00)           | I(100,00) | I(99,93) V(0,07)                       | 697        | 100,00         |              | 100,00           |        |        | 99,93          | 0,07         |       |
|     |                     |           |                                        | 698        |                | 100,00       |                  | 100,00 |        | 100,00         |              |       |
|     |                     |           |                                        | 699        | 100,00         |              | 100,00           |        | 100,00 |                |              |       |
| 234 | R(100,00)           | R(100,00) | R(99,92)<br>C(0,05) H(0,03)            | 700        |                | 100,00       |                  | 100,00 |        | 99,95          | 0,05         |       |
|     |                     |           |                                        | 701        |                | 100,00       |                  | 100,00 |        | 99,97          |              |       |
|     |                     |           |                                        | 702        |                | 100,00       |                  | 100,00 |        | 100,00         |              |       |
| 235 | T(100,00)           | T(100,00) | T(100,00)                              | 703        | 100,00         |              | 100,00           |        | 100,00 |                |              |       |
|     |                     |           |                                        | 704        |                | 100,00       |                  | 100,00 |        | 100,00         |              |       |
|     |                     |           |                                        | 705        |                | 100,00       |                  | 100,00 | 39,78  | 60,22          |              |       |
| 236 | E(100,00)           | E(100,00) | E(100,00)                              | 706        |                | 100,00       |                  | 100,00 |        | 100,00         |              |       |
|     |                     |           |                                        | 707        | 100,00         |              | 100,00           |        | 100,00 |                | 100,00       |       |
|     |                     |           |                                        | 708        |                | 100,00       |                  | 100,00 |        | 100,00         |              |       |
| 237 | E(100,00)           | E(100,00) | E(100,00)                              | 709        |                | 100,00       |                  | 100,00 |        | 100,00         |              |       |
|     |                     |           |                                        | 710        | 100,00         |              | 100,00           |        | 100,00 |                | 100,00       |       |
|     |                     |           |                                        | 711        |                | 100,00       |                  | 100,00 |        | 100,00         |              |       |
| 238 | A(100,00)           | A(100,00) | A(99,95)<br>S(0,05)                    | 712        |                | 100,00       |                  | 100,00 |        | 99,95          | 0,05         |       |
|     |                     |           |                                        | 713        |                | 100,00       |                  | 100,00 |        | 100,00         |              |       |
|     |                     |           |                                        | 714        | 100,00         |              | 100,00           |        | 99,76  | 0,24           |              |       |
| 239 | I(100,00)           | I(100,00) | I(99,79)<br>M(0,04) T(0,03)<br>V(0,14) | 715        | 100,00         |              | 100,00           |        | 99,86  | 0,14           |              |       |
|     |                     |           |                                        | 716        |                | 100,00       |                  | 100,00 | 0,03   | 99,97          |              |       |
|     |                     |           |                                        | 717        |                | 100,00       |                  | 99,96  | 0,04   |                |              |       |
| 240 | H(0,40)<br>Y(99,60) | Y(100,00) | C(0,09) H(0,14)<br>Y(99,77)            | 718        |                | 0,40         |                  | 99,60  |        | 100,00         | 0,14         | 99,86 |
|     |                     |           |                                        | 719        | 100,00         |              | 100,00           |        | 99,91  | 0,09           |              |       |
|     |                     |           |                                        | 720        |                | 100,00       |                  | 99,42  | 0,58   |                |              |       |
| 241 | Q(100,00)           | Q(100,00) | Q(100,00)                              | 721        |                | 100,00       |                  | 100,00 |        | 100,00         |              |       |
|     |                     |           |                                        | 722        | 100,00         |              | 100,00           |        | 100,00 |                | 100,00       |       |
|     |                     |           |                                        | 723        | 10,57          |              | 89,43            |        | 100,00 |                | 100,00       |       |
| 242 | C(100,00)           | C(100,00) | R(0,31)<br>C(99,69)                    | 724        |                |              |                  | 100,00 |        | 100,00         | 0,31         | 99,69 |
|     |                     |           |                                        | 725        |                |              | 100,00           |        | 100,00 |                | 100,00       |       |
|     |                     |           |                                        | 726        |                |              | 100,00           |        | 100,00 |                | 100,00       |       |
| 243 | C(100,00)           | C(100,00) | R(0,07)C(99,93)                        | 727        |                |              |                  | 100,00 |        | 100,00         | 0,07         | 99,93 |
|     |                     |           |                                        | 728        |                |              | 100,00           |        | 100,00 |                | 100,00       |       |
|     |                     |           |                                        | 729        |                |              | 100,00           |        | 100,00 | 0,11           | 99,89        |       |
| 244 | D(99,78)<br>G(0,22) | D(100,00) | D(99,85)<br>G(0,15)                    | 730        |                |              |                  | 100,00 |        | 100,00         |              |       |
|     |                     |           |                                        | 731        | 99,78          |              | 100,00           |        | 99,85  | 0,15           |              |       |
|     |                     |           |                                        | 732        |                | 100,00       |                  | 100,00 |        | 100,00         |              |       |
| 245 | L(100,00)           | L(100,00) | L(100,00)                              | 733        |                | 100,00       |                  | 100,00 |        | 100,00         |              |       |
|     |                     |           |                                        | 734        |                |              | 100,00           |        | 100,00 |                | 100,00       |       |
|     |                     |           |                                        | 735        |                | 100,00       |                  | 100,00 |        | 100,00         |              |       |
| 246 | D(100,00)           | D(100,00) | D(100,00)                              | 736        |                |              |                  | 100,00 |        | 100,00         |              |       |

|     |                     |           |                                |     |        |        |        |        |        |        |        |        |        |        |        |        |
|-----|---------------------|-----------|--------------------------------|-----|--------|--------|--------|--------|--------|--------|--------|--------|--------|--------|--------|--------|
|     |                     |           |                                | 737 | 100,00 |        |        |        | 100,00 |        |        |        | 100,00 |        |        |        |
|     |                     |           |                                | 738 |        | 100,00 |        |        |        | 100,00 |        |        |        | 100,00 |        |        |
| 247 | P(100,00)           | P(100,00) | P(100,00)                      | 739 |        | 100,00 |        |        |        | 100,00 |        |        |        | 100,00 |        |        |
|     |                     |           |                                | 740 |        | 100,00 |        |        |        | 100,00 |        |        |        | 100,00 |        |        |
|     |                     |           |                                | 741 |        | 100,00 |        |        |        | 100,00 |        |        |        | 100,00 |        |        |
|     |                     |           |                                | 742 |        | 100,00 |        |        |        | 100,00 |        |        |        | 100,00 |        |        |
| 248 | R(0,26)<br>Q(99,74) | Q(100,00) | R(0,07)<br>Q(99,93)            | 743 | 99,74  |        | 0,26   |        | 100,00 |        |        |        | 99,93  |        | 0,07   |        |
|     |                     |           |                                | 744 | 100,00 |        |        |        | 100,00 |        |        |        | 100,00 |        |        |        |
|     |                     |           |                                | 745 |        |        | 100,00 |        |        |        | 100,00 |        |        |        | 100,00 |        |
| 249 | A(100,00)           | A(100,00) | A(100,00)                      | 746 |        | 100,00 |        |        |        | 100,00 |        |        |        | 100,00 |        |        |
|     |                     |           |                                | 747 |        | 100,00 |        |        |        | 100,00 |        |        |        | 100,00 |        |        |
|     |                     |           |                                | 748 |        | 100,00 |        |        |        | 100,00 |        |        |        | 100,00 |        |        |
| 250 | R(100,00)           | R(100,00) | R(99,97)<br>H(0,03)            | 749 |        |        | 100,00 |        |        |        | 100,00 |        |        | 0,03   | 99,97  |        |
|     |                     |           |                                | 750 |        | 100,00 |        |        |        |        | 99,68  | 0,32   |        | 99,97  |        | 0,03   |
|     |                     |           |                                | 751 |        |        | 100,00 |        |        |        | 100,00 |        | 0,38   |        | 99,62  |        |
| 251 | V(100,00)           | V(100,00) | A(0,05) M(0,38)<br>V(99,57)    | 752 |        |        |        | 100,00 |        |        |        | 100,00 |        | 0,05   |        | 99,95  |
|     |                     |           |                                | 753 | 0,26   |        | 99,74  |        |        |        | 100,00 |        | 0,04   |        | 99,96  |        |
|     |                     |           |                                | 754 |        |        | 100,00 |        |        |        | 100,00 |        |        |        | 100,00 |        |
| 252 | A(99,78)<br>V(0,22) | A(100,00) | A(100,00)                      | 755 |        | 99,78  |        | 0,22   |        | 100,00 |        |        |        | 100,00 |        |        |
|     |                     |           |                                | 756 |        | 100,00 |        |        |        | 100,00 |        |        |        | 100,00 |        |        |
|     |                     |           |                                | 757 | 100,00 |        |        |        | 100,00 |        |        |        | 99,91  |        | 0,09   |        |
| 253 | I(100,00)           | I(100,00) | I(99,57) T(0,33)<br>V(0,10)    | 758 |        |        |        | 100,00 |        |        |        | 100,00 |        | 0,33   |        | 99,67  |
|     |                     |           |                                | 759 |        | 100,00 |        |        |        | 100,00 |        |        |        | 100,00 |        |        |
|     |                     |           |                                | 760 | 100,00 |        |        |        | 100,00 |        |        |        | 99,97  |        | 0,03   |        |
| 254 | K(100,00)           | K(100,00) | E(0,03)<br>K(99,45)<br>T(0,52) | 761 | 100,00 |        |        |        | 100,00 |        |        |        | 99,48  | 0,52   |        |        |
|     |                     |           |                                | 762 |        |        | 100,00 |        |        |        | 100,00 |        |        |        | 100,00 |        |
|     |                     |           |                                | 763 |        |        |        | 100,00 |        |        |        | 100,00 |        |        |        | 100,00 |
| 255 | S(100,00)           | S(100,00) | S(100,00)                      | 764 |        | 100,00 |        |        |        | 100,00 |        |        |        | 100,00 |        |        |
|     |                     |           |                                | 765 |        | 99,63  |        | 0,37   |        | 100,00 |        |        |        | 100,00 |        |        |
|     |                     |           |                                | 766 |        | 100,00 |        |        |        | 100,00 |        |        |        | 100,00 |        |        |
| 256 | L(100,00)           | L(100,00) | L(100,00)                      | 767 |        |        |        | 100,00 |        |        |        | 100,00 |        |        |        | 100,00 |
|     |                     |           |                                | 768 |        | 100,00 |        |        |        | 100,00 |        |        |        | 99,97  |        | 0,03   |
|     |                     |           |                                | 769 | 100,00 |        |        |        | 100,00 |        |        |        | 100,00 |        |        |        |
| 257 | T(100,00)           | T(100,00) | I(0,05) T(99,95)               | 770 |        | 100,00 |        |        |        | 100,00 |        |        |        | 99,95  |        | 0,05   |
|     |                     |           |                                | 771 |        | 99,63  |        | 0,37   |        |        |        | 100,00 |        | 0,03   |        | 99,97  |
|     |                     |           |                                | 772 |        |        | 100,00 |        |        |        | 100,00 |        |        |        | 99,54  |        |
| 258 | E(100,00)           | E(100,00) | E(99,54)<br>X(0,46)            | 773 | 100,00 |        |        |        | 100,00 |        |        |        | 99,54  |        |        |        |
|     |                     |           |                                | 774 |        |        | 100,00 |        |        |        | 100,00 |        |        |        | 100,00 |        |
|     |                     |           |                                | 775 | 100,00 |        |        |        | 100,00 |        |        |        | 100,00 |        |        |        |
| 259 | R(100,00)           | R(100,00) | R(100,00)                      | 776 |        |        | 100,00 |        |        |        | 100,00 |        |        |        | 100,00 |        |
|     |                     |           |                                | 777 |        |        | 100,00 |        | 48,23  |        | 51,77  |        | 99,86  |        | 0,14   |        |
| 260 | L(100,00)           | L(100,00) | L(100,00)                      | 778 |        | 100,00 |        |        |        | 100,00 |        |        |        | 100,00 |        |        |

|     |           |                     |                     |     |        |        |        |        |        |        |        |        |        |        |        |
|-----|-----------|---------------------|---------------------|-----|--------|--------|--------|--------|--------|--------|--------|--------|--------|--------|--------|
|     |           |                     |                     | 779 |        |        |        | 100,00 |        |        |        | 100,00 |        |        | 100,00 |
|     |           |                     |                     | 780 |        |        | 0,22   | 99,78  |        | 0,32   |        | 99,68  |        |        | 100,00 |
|     |           |                     |                     | 781 |        |        |        | 100,00 |        |        |        | 100,00 |        |        | 100,00 |
| 261 | Y(100,00) | Y(100,00)           | Y(100,00)           | 782 | 100,00 |        |        |        | 100,00 |        |        | 100,00 |        |        |        |
|     |           |                     |                     | 783 |        |        |        | 100,00 |        |        |        | 100,00 | 0,07   |        | 99,93  |
|     |           |                     |                     | 784 |        |        | 100,00 |        |        |        | 100,00 |        |        | 100,00 |        |
| 262 | V(100,00) | V(100,00)           | A(0,09)<br>V(99,91) | 785 |        |        |        | 100,00 |        |        |        | 100,00 | 0,09   |        | 99,91  |
|     |           |                     |                     | 786 |        | 10,75  |        | 89,25  |        | 95,44  |        | 4,56   | 100,00 |        |        |
|     |           |                     |                     | 787 |        |        | 100,00 |        |        |        | 100,00 |        |        | 100,00 |        |
| 263 | G(100,00) | G(100,00)           | G(100,00)           | 788 |        |        | 100,00 |        |        |        | 100,00 |        |        | 100,00 |        |
|     |           |                     |                     | 789 |        |        | 100,00 |        |        |        | 100,00 |        |        | 100,00 |        |
|     |           |                     |                     | 790 |        |        | 100,00 |        |        |        | 100,00 |        |        | 100,00 |        |
| 264 | G(100,00) | G(100,00)           | G(100,00)           | 791 |        |        | 100,00 |        |        |        | 100,00 |        |        | 100,00 |        |
|     |           |                     |                     | 792 |        | 100,00 |        |        |        | 99,68  |        | 0,32   | 100,00 |        |        |
|     |           |                     |                     | 793 |        | 100,00 |        |        |        | 100,00 |        |        | 100,00 |        |        |
| 265 | P(100,00) | P(100,00)           | P(100,00)           | 794 |        | 100,00 |        |        |        | 100,00 |        |        | 100,00 |        |        |
|     |           |                     |                     | 795 |        |        |        | 100,00 |        | 24,28  |        | 75,72  |        |        | 100,00 |
|     |           |                     |                     | 796 |        | 100,00 |        |        |        | 100,00 |        |        | 100,00 |        |        |
| 266 | L(100,00) | L(100,00)           | L(100,00)           | 797 |        |        |        | 100,00 |        |        |        | 100,00 |        |        | 100,00 |
|     |           |                     |                     | 798 |        |        |        | 100,00 |        |        |        | 100,00 | 0,03   |        | 99,97  |
|     |           |                     |                     | 799 | 100,00 |        |        |        | 100,00 |        |        | 99,77  |        | 0,23   |        |
| 267 | T(100,00) | T(100,00)           | A(0,23)<br>T(99,77) | 800 |        | 100,00 |        |        |        | 100,00 |        |        | 100,00 |        |        |
|     |           |                     |                     | 801 |        | 100,00 |        |        |        | 100,00 |        |        | 100,00 |        |        |
|     |           |                     |                     | 802 | 100,00 |        |        |        | 100,00 |        |        | 100,00 |        |        |        |
| 268 | N(100,00) | N(100,00)           | N(99,94)<br>S(0,06) | 803 | 100,00 |        |        |        | 100,00 |        |        | 99,94  |        | 0,06   |        |
|     |           |                     |                     | 804 |        | 2,71   |        | 97,29  |        |        |        | 100,00 | 0,07   |        | 99,93  |
|     |           |                     |                     | 805 |        |        |        | 100,00 |        |        |        | 100,00 |        |        | 100,00 |
| 269 | S(100,00) | S(100,00)           | S(100,00)           | 806 |        | 100,00 |        |        |        | 100,00 |        |        | 100,00 |        |        |
|     |           |                     |                     | 807 | 99,56  |        | 0,44   |        |        | 100,00 |        |        | 100,00 |        |        |
|     |           |                     |                     | 808 | 100,00 |        |        |        | 100,00 |        |        | 100,00 |        |        |        |
| 270 | R(100,00) | R(100,00)           | R(100,00)           | 809 |        |        | 100,00 |        |        |        | 100,00 |        |        | 100,00 |        |
|     |           |                     |                     | 810 |        |        | 100,00 |        | 24,28  |        | 75,72  |        |        | 100,00 |        |
|     |           |                     |                     | 811 |        |        | 100,00 |        |        |        | 100,00 |        |        | 100,00 |        |
| 271 | G(100,00) | G(100,00)           | G(100,00)           | 812 |        |        | 100,00 |        |        |        | 100,00 |        |        | 100,00 |        |
|     |           |                     |                     | 813 |        |        | 100,00 |        |        |        | 100,00 |        |        | 100,00 |        |
|     |           |                     |                     | 814 |        |        | 100,00 |        |        |        | 100,00 |        |        | 100,00 |        |
| 272 | E(100,00) | E(100,00)           | E(100,00)           | 815 | 100,00 |        |        |        | 100,00 |        |        | 100,00 |        |        |        |
|     |           |                     |                     | 816 | 100,00 |        |        |        | 0,32   |        | 99,68  |        |        | 100,00 |        |
|     |           |                     |                     | 817 | 100,00 |        |        |        | 100,00 |        |        | 100,00 |        |        |        |
| 273 | N(100,00) | N(99,68)<br>S(0,32) | N(99,81)<br>S(0,19) | 818 | 100,00 |        |        |        | 99,68  |        | 0,32   |        | 99,81  |        | 0,19   |
|     |           |                     |                     | 819 |        | 100,00 |        |        |        | 100,00 |        |        | 100,00 |        |        |
| 274 |           | C(100,00)           |                     | 820 |        |        |        | 100,00 |        |        |        | 100,00 | 0,06   |        | 99,94  |

|     |                     |           |                                |                   |                           |                  |                 |  |                  |  |                 |                 |                 |                  |        |               |
|-----|---------------------|-----------|--------------------------------|-------------------|---------------------------|------------------|-----------------|--|------------------|--|-----------------|-----------------|-----------------|------------------|--------|---------------|
|     | C(99,63)<br>Y(0,37) |           | R(0,06)<br>C(99,94)            | 821<br>822        | 0,37<br>100,00            | 99,63            |                 |  | 100,00           |  |                 | 100,00          |                 | 99,34            | 100,00 | 0,66          |
| 275 | G(100,00)           | G(100,00) | D(0,52)<br>G(99,48)            | 823<br>824<br>825 |                           | 100,00<br>100,00 |                 |  | 100,00<br>100,00 |  |                 | 0,52            |                 | 100,00<br>99,48  |        |               |
| 276 | Y(100,00)           | Y(100,00) | Y(100,00)                      | 826<br>827<br>828 | 100,00<br>0,37            |                  | 100,00<br>99,63 |  | 100,00<br>99,73  |  | 100,00<br>0,27  | 100,00          |                 |                  |        | 100,00        |
| 277 | R(100,00)           | R(100,00) | R(99,88)<br>C(0,08) H(0,04)    | 829<br>830<br>831 |                           | 100,00<br>100,00 |                 |  | 100,00<br>100,00 |  | 100,00          | 0,04            |                 | 99,92<br>99,96   |        | 0,08          |
| 278 | R(100,00)           | R(100,00) | R(100,00)                      | 832<br>833<br>834 | 100,00<br>0,48            |                  | 100,00<br>99,52 |  | 100,00           |  |                 | 100,00<br>0,03  |                 | 100,00<br>99,97  |        |               |
| 279 | C(100,00)           | C(100,00) | R(0,09)<br>C(99,88)<br>Y(0,03) | 835<br>836<br>837 |                           | 100,00           | 100,00          |  | 100,00           |  | 100,00          | 0,04            | 0,09            | 99,96            |        | 99,91         |
| 280 | R(99,82)<br>C(0,18) | R(100,00) | R(99,91)<br>C(0,04) H(0,05)    | 838<br>839<br>840 |                           | 99,82<br>100,00  | 0,18            |  | 100,00<br>100,00 |  |                 | 0,05            | 99,96<br>100,00 | 99,95            |        | 0,04          |
| 281 | A(100,00)           | A(100,00) | A(100,00)                      | 841<br>842<br>843 |                           | 100,00<br>100,00 |                 |  | 100,00           |  |                 | 0,04            | 100,00          | 100,00           |        |               |
| 282 | S(100,00)           | S(100,00) | G(0,04)<br>S(99,96)            | 844<br>845<br>846 | 100,00<br>12,69           |                  | 100,00<br>87,31 |  | 100,00           |  |                 | 99,96<br>99,95  |                 | 0,04<br>100,00   |        | 0,05          |
| 283 | D(0,22)<br>G(99,78) | G(100,00) | G(100,00)                      | 847<br>848<br>849 | 0,22<br>100,00            | 100,00<br>99,78  |                 |  | 100,00<br>100,00 |  |                 |                 | 99,95           | 100,00<br>100,00 |        | 0,05          |
| 284 | V(100,00)           | V(100,00) | V(100,00)                      | 850<br>851<br>852 |                           | 100,00<br>0,18   | 100,00          |  | 100,00           |  | 100,00<br>37,35 | 99,97           |                 | 100,00<br>0,03   |        | 100,00        |
| 285 | L(100,00)           | L(100,00) | L(99,95) P(0,05)               | 853<br>854<br>855 |                           | 100,00           | 100,00          |  | 100,00           |  | 100,00          | 99,71<br>0,05   |                 | 99,96            |        | 0,29<br>99,95 |
| 286 | T(100,00)           | T(100,00) | A(0,11)<br>T(99,89)            | 856<br>857<br>858 | 100,00<br>100,00<br>12,44 |                  | 87,56           |  | 100,00<br>100,00 |  |                 | 99,89<br>100,00 | 100,00          |                  | 0,11   |               |
| 287 | T(100,00)           | T(100,00) | A(0,09)<br>T(99,91)            | 859<br>860<br>861 | 100,00<br>100,00<br>0,44  |                  | 99,56           |  | 100,00<br>100,00 |  | 100,00          | 99,91<br>100,00 |                 | 0,09             |        | 100,00        |
| 288 | S(100,00)           | S(100,00) |                                | 862               | 100,00                    |                  |                 |  | 100,00           |  |                 | 99,93           |                 | 0,07             |        |               |



|     |                     |           |                                |                     |            |        |        |        |        |        |        |        |        |        |        |       |
|-----|---------------------|-----------|--------------------------------|---------------------|------------|--------|--------|--------|--------|--------|--------|--------|--------|--------|--------|-------|
|     |                     |           |                                | G(0,07)<br>S(99,93) | 863<br>864 |        | 100,00 | 100,00 |        |        | 100,00 |        |        | 100,00 |        |       |
| 289 | C(100,00)           | C(100,00) | R(0,14)<br>C(99,86)            | 865                 |            |        |        |        |        |        |        |        |        |        |        |       |
|     |                     |           |                                | 866                 |            |        | 100,00 |        |        | 100,00 | 100,00 |        |        |        |        |       |
|     |                     |           |                                | 867                 |            | 10,39  |        | 89,61  |        | 100,00 |        |        | 100,00 |        |        |       |
| 290 | G(100,00)           | G(100,00) | G(100,00)                      | 868                 |            |        | 100,00 |        |        | 100,00 |        |        |        | 100,00 |        |       |
|     |                     |           |                                | 869                 |            |        | 100,00 |        |        | 100,00 |        |        |        | 100,00 |        |       |
|     |                     |           |                                | 870                 |            | 0,40   |        | 99,60  |        | 3,48   |        | 96,52  |        | 0,04   |        | 99,96 |
| 291 | N(100,00)           | N(100,00) | N(99,68)<br>D(0,10) S(0,22)    | 871                 | 100,00     |        |        |        | 100,00 |        |        |        | 99,90  |        | 0,10   |       |
|     |                     |           |                                | 872                 | 100,00     |        |        |        | 100,00 |        |        |        | 99,78  |        | 0,22   |       |
|     |                     |           |                                | 873                 |            | 99,67  |        | 0,33   |        | 100,00 |        |        |        | 99,96  |        | 0,04  |
| 292 | T(100,00)           | T(100,00) | T(100,00)                      | 874                 | 100,00     |        |        |        | 100,00 |        |        |        | 100,00 |        |        |       |
|     |                     |           |                                | 875                 |            | 100,00 |        |        | 100,00 |        |        |        | 100,00 |        |        |       |
|     |                     |           |                                | 876                 |            | 100,00 |        |        | 100,00 |        |        |        | 100,00 |        |        |       |
| 293 | L(100,00)           | L(100,00) | L(100,00)                      | 877                 |            | 100,00 |        |        | 100,00 |        |        |        | 100,00 |        |        |       |
|     |                     |           |                                | 878                 |            |        |        | 100,00 |        |        |        | 100,00 |        |        |        |       |
|     |                     |           |                                | 879                 |            | 100,00 |        |        | 100,00 |        |        | 100,00 |        |        |        |       |
| 294 | T(100,00)           | T(100,00) | A(0,08)<br>T(99,92)            | 880                 | 100,00     |        |        |        | 100,00 |        |        |        | 99,92  |        | 0,08   |       |
|     |                     |           |                                | 881                 |            | 100,00 |        |        | 100,00 |        |        |        | 100,00 |        |        |       |
|     |                     |           |                                | 882                 |            |        |        | 100,00 |        |        | 100,00 |        |        |        |        |       |
| 295 | C(100,00)           | C(100,00) | R(0,15)<br>C(99,81)<br>Y(0,04) | 883                 |            |        |        | 100,00 |        |        | 100,00 |        | 0,15   |        | 99,85  |       |
|     |                     |           |                                | 884                 |            |        | 100,00 |        |        | 100,00 |        | 0,04   |        | 99,96  |        |       |
|     |                     |           |                                | 885                 |            | 87,82  |        | 12,18  |        | 100,00 |        |        |        | 99,69  |        | 0,31  |
| 296 | Y(100,00)           | Y(100,00) | C(0,11) H(0,15)<br>Y(99,74)    | 886                 |            |        |        | 100,00 |        |        |        | 100,00 |        | 0,15   |        | 99,85 |
|     |                     |           |                                | 887                 | 100,00     |        |        |        | 100,00 |        |        |        | 99,89  |        | 0,11   |       |
|     |                     |           |                                | 888                 |            | 99,82  |        | 0,18   |        | 100,00 |        |        |        | 99,74  |        | 0,26  |
| 297 | I(99,82)<br>V(0,18) | I(100,00) | I(99,75) T(0,15)<br>V(0,10)    | 889                 | 99,82      |        | 0,18   |        | 100,00 |        |        |        | 99,90  |        | 0,10   |       |
|     |                     |           |                                | 890                 |            |        |        | 100,00 |        |        | 100,00 |        | 0,15   |        | 99,85  |       |
|     |                     |           |                                | 891                 |            | 100,00 |        |        | 100,00 |        |        | 100,00 |        |        |        |       |
| 298 | K(100,00)           | K(100,00) | E(0,12)<br>K(99,88)            | 892                 | 100,00     |        |        |        | 100,00 |        |        |        | 99,88  |        | 0,12   |       |
|     |                     |           |                                | 893                 | 100,00     |        |        |        | 100,00 |        |        |        | 100,00 |        |        |       |
|     |                     |           |                                | 894                 |            |        | 100,00 |        |        | 100,00 |        |        |        | 100,00 |        |       |
| 299 | A(100,00)           | A(100,00) | A(100,00)                      | 895                 |            |        | 100,00 |        |        | 100,00 |        |        |        | 100,00 |        |       |
|     |                     |           |                                | 896                 |            | 100,00 |        |        | 100,00 |        |        |        | 100,00 |        |        |       |
|     |                     |           |                                | 897                 |            | 100,00 |        |        | 100,00 |        |        |        | 99,93  |        | 0,07   |       |
| 300 | Q(100,00)           | R(100,00) | R(100,00)                      | 898                 |            | 100,00 |        |        |        |        |        |        | 100,00 |        |        |       |
|     |                     |           |                                | 899                 | 100,00     |        |        |        |        | 100,00 |        | 100,00 |        | 100,00 |        |       |
|     |                     |           |                                | 900                 |            |        |        |        | 100,00 |        | 100,00 |        | 99,96  |        | 100,00 | 0,04  |
| 301 | A(100,00)           | A(100,00) | A(100,00)                      | 901                 |            |        | 100,00 |        |        | 100,00 |        |        |        | 100,00 |        |       |
|     |                     |           |                                | 902                 |            | 100,00 |        |        | 100,00 |        |        |        | 100,00 |        |        |       |
|     |                     |           |                                | 903                 | 100,00     |        |        |        | 100,00 |        |        |        | 99,91  |        | 0,09   |       |
| 302 | A(100,00)           | A(100,00) | A(100,00)                      | 904                 |            |        | 100,00 |        |        | 100,00 |        |        | 100,00 |        |        |       |

|     |                     |           |                                |     |        |        |  |        |  |        |        |  |        |        |        |        |
|-----|---------------------|-----------|--------------------------------|-----|--------|--------|--|--------|--|--------|--------|--|--------|--------|--------|--------|
|     |                     |           |                                | 905 |        | 100,00 |  |        |  | 100,00 |        |  |        | 100,00 |        |        |
|     |                     |           |                                | 906 |        | 100,00 |  |        |  | 100,00 |        |  |        | 100,00 |        |        |
| 303 | C(100,00)           | C(100,00) | C(100,00)                      | 907 |        |        |  | 100,00 |  |        | 100,00 |  |        |        | 100,00 |        |
|     |                     |           |                                | 908 |        |        |  | 100,00 |  |        | 100,00 |  |        | 100,00 |        |        |
|     |                     |           |                                | 909 |        | 0,26   |  | 99,74  |  |        | 100,00 |  |        | 0,05   |        | 99,95  |
| 304 | R(100,00)           | R(100,00) | R(99,96) *(0,04)               | 910 |        | 100,00 |  |        |  | 100,00 |        |  |        | 99,96  |        | 0,04   |
|     |                     |           |                                | 911 |        |        |  | 100,00 |  |        | 100,00 |  |        |        | 100,00 |        |
|     |                     |           |                                | 912 | 100,00 |        |  |        |  | 100,00 |        |  | 100,00 |        |        |        |
| 305 | A(100,00)           | A(100,00) | A(99,96)<br>V(0,04)            | 913 |        |        |  | 100,00 |  |        | 100,00 |  |        |        | 100,00 |        |
|     |                     |           |                                | 914 |        | 100,00 |  |        |  | 100,00 |        |  |        | 99,96  |        | 0,04   |
|     |                     |           |                                | 915 |        | 100,00 |  |        |  | 100,00 |        |  |        | 99,10  |        | 0,90   |
| 306 | A(99,82)<br>V(0,18) | A(100,00) | A(99,91)<br>T(0,05) V(0,04)    | 916 |        |        |  | 100,00 |  |        | 100,00 |  |        | 0,05   |        | 99,95  |
|     |                     |           |                                | 917 |        | 99,82  |  | 0,18   |  | 100,00 |        |  |        | 99,96  |        | 0,04   |
|     |                     |           |                                | 918 | 100,00 |        |  |        |  | 100,00 |        |  | 100,00 |        |        |        |
| 307 | G(100,00)           | G(100,00) | G(100,00)                      | 919 |        |        |  | 100,00 |  |        | 100,00 |  |        |        | 100,00 |        |
|     |                     |           |                                | 920 |        |        |  | 100,00 |  |        | 100,00 |  |        |        | 100,00 |        |
|     |                     |           |                                | 921 |        |        |  | 100,00 |  |        | 100,00 |  |        |        | 100,00 |        |
| 308 | L(99,78)<br>F(0,22) | L(100,00) | L(100,00)                      | 922 |        | 99,78  |  | 0,22   |  | 100,00 |        |  |        | 100,00 |        |        |
|     |                     |           |                                | 923 |        |        |  | 100,00 |  |        |        |  | 100,00 |        |        | 100,00 |
|     |                     |           |                                | 924 |        | 100,00 |  |        |  | 100,00 |        |  |        | 100,00 |        |        |
| 309 | R(100,00)           | Q(100,00) | R(0,16)<br>Q(99,84)            | 925 |        | 100,00 |  |        |  | 100,00 |        |  |        | 100,00 |        |        |
|     |                     |           |                                | 926 |        |        |  | 100,00 |  | 100,00 |        |  |        | 99,84  |        | 0,16   |
|     |                     |           |                                | 927 |        |        |  | 100,00 |  |        | 100,00 |  |        |        | 100,00 |        |
| 310 | D(100,00)           | D(100,00) | D(100,00)                      | 928 |        |        |  | 100,00 |  |        | 100,00 |  |        |        | 100,00 |        |
|     |                     |           |                                | 929 | 100,00 |        |  |        |  | 100,00 |        |  |        | 100,00 |        |        |
|     |                     |           |                                | 930 |        | 100,00 |  |        |  | 100,00 |        |  |        | 100,00 |        |        |
| 311 | C(100,00)           | C(100,00) | R(0,09)<br>C(99,91)            | 931 |        |        |  | 100,00 |  |        | 100,00 |  |        | 0,09   |        | 99,91  |
|     |                     |           |                                | 932 |        |        |  | 100,00 |  |        | 100,00 |  |        |        | 100,00 |        |
|     |                     |           |                                | 933 |        | 100,00 |  |        |  | 100,00 |        |  |        | 99,61  |        | 0,39   |
| 312 | A(0,18)<br>T(99,82) | T(100,00) | A(0,10) I(0,07)<br>T(99,83)    | 934 | 99,82  |        |  | 0,18   |  | 100,00 |        |  |        | 99,90  |        | 0,10   |
|     |                     |           |                                | 935 |        | 100,00 |  |        |  | 100,00 |        |  |        | 99,93  |        | 0,07   |
|     |                     |           |                                | 936 |        | 100,00 |  |        |  | 100,00 |        |  |        | 99,96  |        | 0,04   |
| 313 | I(0,18)<br>M(99,82) | M(100,00) | I(0,03)<br>M(99,91)<br>T(0,06) | 937 | 100,00 |        |  |        |  | 100,00 |        |  |        | 100,00 |        |        |
|     |                     |           |                                | 938 |        |        |  | 100,00 |  |        | 100,00 |  |        | 0,06   |        | 99,94  |
|     |                     |           |                                | 939 | 0,18   |        |  | 99,82  |  |        | 100,00 |  |        | 0,03   |        | 99,97  |
| 314 | L(100,00)           | L(100,00) | L(99,51) F(0,39)<br>P(0,10)    | 940 |        | 100,00 |  |        |  | 100,00 |        |  |        | 99,61  |        | 0,39   |
|     |                     |           |                                | 941 |        |        |  | 100,00 |  |        | 100,00 |  |        | 0,10   |        | 99,90  |
|     |                     |           |                                | 942 |        | 99,60  |  | 0,40   |  | 100,00 |        |  |        | 100,00 |        |        |
| 315 | V(100,00)           | V(100,00) | A(0,20)<br>V(99,80)            | 943 |        |        |  | 100,00 |  |        | 100,00 |  |        |        | 100,00 |        |
|     |                     |           |                                | 944 |        |        |  | 100,00 |  |        | 100,00 |  |        | 0,20   |        | 99,80  |
|     |                     |           |                                | 945 |        |        |  | 100,00 |  |        | 100,00 |  |        | 0,55   |        | 99,45  |
| 316 | C(100,00)           | C(100,00) |                                | 946 |        |        |  | 100,00 |  |        | 100,00 |  |        | 0,21   |        | 99,79  |

|     |                     |           |                                |                   |  |        |                  |                  |                  |                  |        |                  |                 |                |      |                  |                 |
|-----|---------------------|-----------|--------------------------------|-------------------|--|--------|------------------|------------------|------------------|------------------|--------|------------------|-----------------|----------------|------|------------------|-----------------|
|     |                     |           | R(0,21)<br>C(99,79)            | 947<br>948        |  |        | 100,00           |                  |                  | 100,00           |        |                  |                 | 100,00         |      |                  |                 |
|     |                     |           |                                |                   |  |        | 100,00           |                  |                  | 100,00           |        |                  | 0,07            |                |      | 99,93            |                 |
| 317 | G(100,00)           | G(100,00) | G(99,30)<br>S(0,70)            | 949<br>950<br>951 |  |        | 100,00<br>100,00 |                  |                  | 100,00<br>100,00 |        |                  | 0,70            |                |      | 99,30<br>100,00  |                 |
|     |                     |           |                                |                   |  | 99,82  |                  | 0,18             |                  |                  | 100,00 |                  |                 | 99,96          |      |                  | 0,04            |
| 318 | D(100,00)           | D(100,00) | D(99,92)<br>G(0,08)            | 952<br>953<br>954 |  |        | 100,00           |                  |                  | 100,00           |        |                  | 99,92           |                |      | 100,00<br>0,08   |                 |
|     |                     |           |                                |                   |  | 100,00 |                  |                  |                  | 100,00           |        |                  |                 | 99,93          |      |                  | 0,07            |
| 319 | D(100,00)           | D(100,00) | D(100,00)                      | 955<br>956<br>957 |  |        | 100,00           |                  |                  | 100,00           |        |                  | 100,00          |                |      | 100,00           |                 |
|     |                     |           |                                |                   |  | 100,00 |                  |                  |                  | 100,00           |        |                  |                 | 99,97          |      |                  | 0,03            |
| 320 | L(100,00)           | L(100,00) | L(100,00)                      | 958<br>959<br>960 |  |        |                  | 100,00<br>100,00 |                  |                  | 59,81  |                  | 40,19<br>100,00 |                |      |                  | 100,00          |
|     |                     |           |                                |                   |  | 100,00 |                  |                  |                  | 100,00           |        |                  | 99,95           |                |      | 0,05             |                 |
| 321 | V(100,00)           | V(100,00) | I(0,37) V(99,63)               | 961<br>962<br>963 |  |        | 100,00           |                  | 100,00           |                  |        | 100,00           | 0,37            |                |      | 99,63            | 100,00          |
|     |                     |           |                                |                   |  | 100,00 |                  |                  |                  | 100,00           |        |                  |                 | 100,00         |      |                  |                 |
| 322 | V(100,00)           | V(100,00) | A(0,09)<br>V(99,91)            | 964<br>965<br>966 |  |        | 100,00           |                  | 100,00<br>100,00 |                  |        | 100,00<br>100,00 |                 | 0,09<br>0,05   |      | 100,00           | 99,91<br>99,95  |
| 323 | I(100,00)           | I(100,00) | I(99,80) T(0,14)<br>V(0,06)    | 967<br>968<br>969 |  |        | 100,00           |                  |                  | 100,00           |        |                  | 99,93           |                |      | 0,07             |                 |
|     |                     |           |                                |                   |  | 100,00 |                  | 100,00           |                  |                  | 100,00 |                  |                 | 0,14<br>100,00 |      |                  | 99,86           |
| 324 | R(0,18)<br>C(99,82) | C(100,00) | R(0,21)<br>C(99,75)<br>Y(0,04) | 970<br>971<br>972 |  | 0,18   |                  | 99,82            |                  |                  |        | 100,00           |                 | 0,21           |      | 99,79            |                 |
|     |                     |           |                                |                   |  |        | 100,00           |                  | 100,00           |                  | 0,70   |                  | 99,30           |                | 0,21 |                  | 99,79           |
| 325 | E(100,00)           | E(100,00) | E(100,00)                      | 973<br>974<br>975 |  |        | 100,00           |                  |                  | 100,00           |        |                  | 100,00          |                |      | 100,00           |                 |
|     |                     |           |                                |                   |  | 99,23  |                  | 0,77             |                  | 100,00           |        |                  | 100,00          |                |      |                  |                 |
| 326 | N(0,29)<br>S(99,71) | S(100,00) | S(100,00)                      | 976<br>977<br>978 |  |        | 100,00<br>0,29   |                  |                  | 100,00           |        |                  | 100,00          |                |      | 100,00           |                 |
|     |                     |           |                                |                   |  | 99,45  |                  | 0,55             |                  |                  |        | 100,00           |                 | 0,15           |      |                  | 99,85           |
| 327 | Q(100,00)           | A(100,00) | A(99,93)<br>T(0,03) V(0,04)    | 979<br>980<br>981 |  | 100,00 |                  |                  |                  | 100,00           |        |                  | 0,03            |                |      | 99,97            | 0,04            |
|     |                     |           |                                |                   |  |        | 100,00           |                  |                  | 100,00           |        |                  |                 | 99,96          |      |                  |                 |
| 328 | G(100,00)           | G(100,00) | G(100,00)                      | 982<br>983<br>984 |  |        | 100,00<br>100,00 |                  |                  | 100,00<br>100,00 |        |                  |                 |                |      | 100,00<br>100,00 |                 |
|     |                     |           |                                |                   |  | 100,00 |                  |                  |                  | 100,00           |        |                  |                 |                |      |                  |                 |
| 329 | V(100,00)           | V(100,00) | A(0,29)<br>V(99,71)            | 985<br>986<br>987 |  |        | 100,00           |                  | 100,00           |                  |        | 100,00<br>100,00 |                 | 0,29           |      | 100,00           | 99,71<br>100,00 |
| 330 | Q(100,00)           | Q(100,00) | Q(100,00)                      | 988               |  | 100,00 |                  |                  |                  | 100,00           |        |                  | 100,00          |                |      |                  |                 |

|     |           |           |                             |      |        |        |        |        |        |        |  |  |        |       |        |      |
|-----|-----------|-----------|-----------------------------|------|--------|--------|--------|--------|--------|--------|--|--|--------|-------|--------|------|
|     |           |           |                             | 989  | 100,00 |        |        |        | 100,00 |        |  |  | 100,00 |       |        |      |
|     |           |           |                             | 990  |        |        | 100,00 |        |        |        |  |  |        |       | 100,00 |      |
| 331 | E(100,00) | E(100,00) | E(100,00)                   | 991  |        |        | 100,00 |        |        | 100,00 |  |  | 100,00 |       | 100,00 |      |
|     |           |           |                             | 992  | 100,00 |        |        |        | 100,00 |        |  |  | 100,00 |       |        |      |
|     |           |           |                             | 993  |        |        | 100,00 |        |        | 100,00 |  |  |        |       | 100,00 |      |
| 332 | D(100,00) | D(100,00) | D(100,00)                   | 994  |        |        | 100,00 |        |        | 100,00 |  |  |        |       | 100,00 |      |
|     |           |           |                             | 995  | 100,00 |        |        |        | 100,00 |        |  |  | 100,00 |       |        |      |
|     |           |           |                             | 996  |        |        |        | 100,00 |        |        |  |  |        | 99,76 |        | 0,24 |
| 333 | A(100,00) | A(100,00) | A(99,88)<br>T(0,05) V(0,07) | 997  |        |        | 100,00 |        |        | 100,00 |  |  | 0,05   |       | 99,95  |      |
|     |           |           |                             | 998  |        | 100,00 |        |        |        | 100,00 |  |  |        | 99,93 |        | 0,07 |
|     |           |           |                             | 999  | 99,27  |        | 0,73   |        |        | 100,00 |  |  | 0,03   |       | 99,97  |      |
| 334 | A(100,00) | A(100,00) | A(99,64)<br>G(0,31) V(0,04) | 1000 |        |        | 100,00 |        |        | 100,00 |  |  |        |       | 100,00 |      |
|     |           |           |                             | 1001 |        | 100,00 |        |        |        | 100,00 |  |  |        | 99,64 | 0,31   | 0,04 |
|     |           |           |                             | 1002 | 0,37   |        | 99,63  |        |        | 100,00 |  |  | 0,21   |       | 99,79  |      |
