# Supplementary material for: Late Relapse and Reinfection in HCV Patients Treated with Direct-Acting Antiviral (DAA) Drugs
Source: MDPI journal article supplement (doi:10.3390/v13061151), 2021-06-16
Supplement: s1 [file s1]

**Table S1.** Frequency of substitutions in Pt1 with respect to a GT1a reference sequence (EF407457.1). The relevant amino acid and nucleotide changes between T0 and T1 are written in red.

| Pt1                    |                             |                                |                        | Pt1     |        |        |        |   |         |        |        |        |        |
|------------------------|-----------------------------|--------------------------------|------------------------|---------|--------|--------|--------|---|---------|--------|--------|--------|--------|
| NS5B<br>aa<br>position | T0 (1a)                     | T1 (1a)                        | NS5B<br>nt<br>position | T0 (1a) |        |        |        |   | T1 (1a) |        |        |        |        |
|                        |                             |                                |                        | A       | C      | G      | T      | - | A       | C      | G      | T      | -      |
| 179                    | A(0,09)<br>V(99,91)         | A(0,12)<br>I(0,04)<br>V(99,84) | 535                    |         |        | 100,00 |        |   | 0,04    |        | 99,96  |        |        |
|                        |                             |                                | 536                    |         | 0,09   |        | 99,91  |   |         | 0,12   |        | 99,88  |        |
|                        |                             |                                | 537                    |         | 100,00 |        |        |   | 100,00  |        |        |        |        |
| 180                    | S(100,00)                   | N(0,26)<br>S(99,74)            | 538                    | 100,00  |        |        |        |   | 100,00  |        |        |        |        |
|                        |                             |                                | 539                    |         |        | 100,00 |        |   | 0,26    |        | 99,74  |        |        |
|                        |                             |                                | 540                    |         | 99,88  |        | 0,12   |   |         | 100,00 |        |        |        |
| 181                    | R(0,10) E(0,09)<br>K(99,81) | R(0,19)<br>I(0,02)<br>K(99,79) | 541                    | 99,91   |        | 0,09   |        |   | 100,00  |        |        |        |        |
|                        |                             |                                | 542                    | 99,90   |        | 0,10   |        |   | 99,79   |        | 0,19   | 0,02   |        |
|                        |                             |                                | 543                    | 100,00  |        |        |        |   | 100,00  |        |        |        |        |
| 182                    | L(100,00)                   | L(100,00)                      | 544                    |         | 100,00 |        |        |   |         | 100,00 |        |        |        |
|                        |                             |                                | 545                    |         |        |        | 100,00 |   |         |        |        | 100,00 |        |
|                        |                             |                                | 546                    |         | 100,00 |        |        |   |         | 100,00 |        |        | 100,00 |
| 183                    | P(100,00)                   | P(100,00)                      | 547                    |         | 100,00 |        |        |   |         | 100,00 |        |        |        |
|                        |                             |                                | 548                    |         | 100,00 |        |        |   |         | 100,00 |        |        |        |
|                        |                             |                                | 549                    |         | 100,00 |        |        |   |         | 100,00 |        |        |        |
| 184                    | Q(100,00)                   | Q(100,00)                      | 550                    |         | 100,00 |        |        |   |         | 100,00 |        |        |        |
|                        |                             |                                | 551                    | 100,00  |        |        |        |   | 100,00  |        |        |        |        |
|                        |                             |                                | 552                    |         |        | 100,00 |        |   |         |        | 100,00 |        |        |
| 185                    | A(93,34)<br>V(6,66)         | A(99,87)<br>T(0,09)<br>V(0,04) | 553                    |         |        | 100,00 |        |   | 0,09    |        | 99,91  |        |        |
|                        |                             |                                | 554                    |         | 93,34  |        | 6,66   |   |         | 99,96  |        | 0,04   |        |
|                        |                             |                                | 555                    |         | 100,00 |        |        |   |         | 99,90  |        | 0,10   |        |
| 186                    | V(100,00)                   | M(0,08)<br>V(99,92)            | 556                    |         |        | 100,00 |        |   | 0,08    |        | 99,92  |        |        |
|                        |                             |                                | 557                    |         |        |        | 100,00 |   |         |        |        | 100,00 |        |
|                        |                             |                                | 558                    |         |        | 100,00 |        |   |         |        | 100,00 |        |        |
| 187                    | M(100,00)                   | M(99,92)<br>V(0,08)            | 559                    | 100,00  |        |        |        |   | 99,92   |        | 0,08   |        |        |
|                        |                             |                                | 560                    |         |        |        | 100,00 |   |         |        |        | 100,00 |        |
|                        |                             |                                | 561                    |         |        | 100,00 |        |   |         |        | 100,00 |        | 100,00 |
| 188                    | G(100,00)                   | G(100,00)                      | 562                    |         |        | 100,00 |        |   |         |        | 100,00 |        |        |
|                        |                             |                                | 563                    |         |        | 100,00 |        |   |         |        | 100,00 |        |        |
|                        |                             |                                | 564                    | 100,00  |        |        |        |   | 100,00  |        |        |        |        |
| 189                    | D(99,74)<br>G(0,26)         | D(99,83)<br>G(0,17)            | 565                    |         |        | 100,00 |        |   |         |        | 100,00 |        |        |
|                        |                             |                                | 566                    | 99,74   |        | 0,26   |        |   | 99,83   |        | 0,17   |        |        |
|                        |                             |                                | 567                    |         | 100,00 |        |        |   |         | 100,00 |        |        |        |
| 190                    | S(100,00)                   | S(100,00)                      | 568                    |         |        |        | 100,00 |   |         |        |        |        | 100,00 |
|                        |                             |                                | 569                    |         | 100,00 |        |        |   |         | 100,00 |        |        |        |
|                        |                             |                                | 570                    |         | 100,00 |        |        |   |         | 100,00 |        |        |        |
| 191                    | C(0,09)<br>Y(99,91)         | C(0,16)<br>Y(99,84)            | 571                    |         |        |        | 100,00 |   |         |        |        |        | 100,00 |
|                        |                             |                                | 572                    | 99,91   |        | 0,09   |        |   | 99,84   |        | 0,16   |        |        |
|                        |                             |                                | 573                    |         | 99,93  |        | 0,07   |   |         | 99,96  |        | 0,04   |        |
| 192                    | G(100,00)                   | R(0,02)<br>G(99,98)            | 574                    |         |        | 100,00 |        |   | 0,02    |        | 99,98  |        |        |
|                        |                             |                                | 575                    |         |        | 100,00 |        |   |         |        | 100,00 |        |        |
|                        |                             |                                | 576                    | 100,00  |        |        |        |   | 100,00  |        |        |        |        |
| 193                    | L(0,29) F(99,71)            | F(100,00)                      | 577                    |         | 0,29   |        | 99,71  |   |         |        |        |        | 100,00 |
|                        |                             |                                | 578                    |         |        |        | 100,00 |   |         |        |        | 100,00 |        |
|                        |                             |                                | 579                    |         | 100,00 |        |        |   |         | 100,00 |        |        |        |
| 194                    | Q(100,00)                   | Q(100,00)                      | 580                    |         | 100,00 |        |        |   |         | 100,00 |        |        |        |
|                        |                             |                                | 581                    | 100,00  |        |        |        |   | 100,00  |        |        |        |        |
|                        |                             |                                | 582                    |         |        | 100,00 |        |   |         |        | 100,00 |        |        |
| 195                    | Y(100,00)                   | C(0,02)<br>H(0,10)<br>Y(99,88) | 583                    |         |        |        | 100,00 |   |         | 0,10   |        | 99,90  |        |
|                        |                             |                                | 584                    | 100,00  |        |        |        |   | 99,98   |        | 0,02   |        |        |
|                        |                             |                                | 585                    |         | 100,00 |        |        |   |         | 100,00 |        |        |        |
| 196                    | P(0,20) S(99,80)            |                                | 586                    |         | 0,20   |        | 99,80  |   | 0,02    | 0,47   |        | 99,51  |        |
|                        |                             |                                | 587                    |         | 100,00 |        |        |   |         | 100,00 |        |        |        |

|     |                      |                                |                   |                            |                           |  |                  |                           |                  |                 |  |
|-----|----------------------|--------------------------------|-------------------|----------------------------|---------------------------|--|------------------|---------------------------|------------------|-----------------|--|
|     |                      | P(0,47)<br>S(99,51)<br>T(0,02) | 588               | 100,00                     |                           |  |                  | 99,86                     |                  | 0,14            |  |
| 197 | P(100,00)            | P(100,00)                      | 589<br>590<br>591 | 100,00<br>100,00<br>100,00 | 100,00<br>100,00          |  |                  | 100,00<br>100,00          | 100,00<br>100,00 |                 |  |
| 198 | G(100,00)            | G(100,00)                      | 592<br>593<br>594 | 100,00<br>100,00<br>100,00 | 100,00<br>100,00          |  |                  | 100,00<br>100,00          | 100,00<br>100,00 |                 |  |
| 199 | R(0,48)<br>Q(99,52)  | Q(100,00)                      | 595<br>596<br>597 | 100,00<br>99,52<br>100,00  | 100,00<br>0,48<br>100,00  |  | 0,53             | 100,00<br>0,04<br>100,00  | 100,00<br>99,96  |                 |  |
| 200 | R(99,47)<br>W(0,53)  | R(100,00)                      | 598<br>599<br>600 | 100,00<br>100,00<br>100,00 | 99,47<br>100,00<br>100,00 |  | 0,53             | 100,00<br>0,04<br>100,00  | 100,00<br>99,96  |                 |  |
| 201 | A(0,09) V(<br>99,91) | V(100,00)                      | 601<br>602<br>603 | 100,00<br>100,00<br>100,00 | 0,09<br>100,00            |  | 99,91<br>100,00  | 100,00<br>0,12<br>100,00  | 100,00<br>99,88  | 100,00<br>99,88 |  |
| 202 | E(100,00)            | E(100,00)                      | 604<br>605<br>606 | 100,00<br>100,00<br>100,00 | 100,00<br>100,00          |  |                  | 100,00<br>100,00          | 100,00           |                 |  |
| 203 | L(0,23) F(99,77)     | L(0,49)<br>F(99,51)            | 607<br>608<br>609 | 100,00<br>100,00<br>100,00 | 0,23<br>100,00            |  | 99,77<br>100,00  | 100,00<br>0,49<br>100,00  | 99,51<br>100,00  | 99,51<br>100,00 |  |
| 204 | L(100,00)            | L(100,00)                      | 610<br>611<br>612 | 100,00<br>100,00<br>100,00 | 100,00<br>100,00          |  | 100,00           | 100,00<br>0,02<br>99,90   | 100,00<br>0,09   | 100,00<br>0,09  |  |
| 205 | V(100,00)            | A(0,20)<br>M(0,09)<br>V(99,71) | 613<br>614<br>615 | 100,00<br>5,27<br>100,00   | 100,00<br>94,73           |  | 100,00<br>100,00 | 0,09<br>0,20<br>100,00    | 99,91<br>99,80   | 99,91<br>99,80  |  |
| 206 | Q(100,00)            | R(99,90)<br>*(0,10)            | 616<br>617<br>618 | 100,00<br>100,00<br>100,00 | 100,00                    |  |                  | 99,90<br>100,00           | 100,00<br>0,10   | 100,00<br>0,10  |  |
| 207 | A(100,00)            | A(99,92)<br>V(0,08)            | 619<br>620<br>621 | 100,00<br>100,00<br>100,00 | 100,00<br>100,00          |  |                  | 100,00<br>99,92<br>100,00 | 100,00<br>0,08   | 100,00<br>0,08  |  |
| 208 | W(100,00)            | R(0,21)<br>W(99,79)            | 622<br>623<br>624 | 100,00<br>100,00<br>100,00 | 100,00<br>100,00          |  | 100,00           | 100,00<br>0,21<br>100,00  | 100,00<br>99,79  | 100,00<br>99,79 |  |
| 209 | K(100,00)            | K(100,00)                      | 625<br>626<br>627 | 100,00<br>100,00<br>100,00 | 100,00                    |  |                  | 100,00<br>100,00          | 100,00           |                 |  |
| 210 | S(100,00)            | S(100,00)                      | 628<br>629<br>630 | 100,00<br>100,00<br>100,00 | 100,00                    |  | 100,00           | 100,00<br>100,00          | 100,00           | 100,00          |  |
| 211 | E(0,09)<br>K(99,91)  | K(100,00)                      | 631<br>632<br>633 | 99,91<br>100,00<br>100,00  | 0,09<br>100,00            |  |                  | 100,00<br>100,00          | 100,00           |                 |  |
| 212 | K(100,00)            | K(100,00)                      | 634<br>635<br>636 | 100,00<br>100,00<br>100,00 | 100,00                    |  |                  | 100,00<br>100,00          | 100,00           |                 |  |
| 213 | T(100,00)            | T(100,00)                      | 637<br>638<br>639 | 100,00<br>100,00<br>100,00 | 100,00                    |  |                  | 100,00<br>100,00          | 100,00           |                 |  |
| 214 | P(100,00)            | P(100,00)                      | 640<br>641<br>642 | 100,00<br>100,00<br>100,00 | 100,00                    |  |                  | 100,00<br>100,00          | 100,00           |                 |  |
| 215 | M(100,00)            | M(99,87)<br>T(0,10)<br>V(0,03) | 643<br>644<br>645 | 100,00<br>100,00<br>100,00 | 100,00                    |  | 100,00           | 99,97<br>0,10<br>100,00   | 0,03<br>99,90    | 0,03<br>99,90   |  |
| 216 | G(100,00)            | G(100,00)                      | 646<br>647        | 100,00<br>100,00           | 100,00<br>100,00          |  |                  | 100,00<br>100,00          | 100,00           |                 |  |

|     |                                |                                |     |        |        |        |        |        |        |        |      |
|-----|--------------------------------|--------------------------------|-----|--------|--------|--------|--------|--------|--------|--------|------|
|     |                                |                                | 648 |        |        | 100,00 |        |        | 100,00 |        |      |
| 217 | L(0,20) F(99,80)               | L(0,50)<br>F(99,50)            | 649 |        | 0,20   |        | 99,80  |        | 0,50   | 99,50  |      |
|     |                                |                                | 650 |        |        |        | 100,00 |        |        | 100,00 |      |
|     |                                |                                | 651 |        | 100,00 |        |        |        | 100,00 |        |      |
| 218 | S(100,00)                      | P(0,02)<br>S(99,98)            | 652 |        |        |        | 100,00 |        | 0,02   | 99,98  |      |
|     |                                |                                | 653 |        | 100,00 |        |        |        | 100,00 |        |      |
|     |                                |                                | 654 | 0,07   |        | 99,93  |        | 0,06   |        | 99,94  |      |
| 219 | Y(100,00)                      | C(0,06)<br>H(0,10)<br>Y(99,84) | 655 |        |        |        | 100,00 |        | 0,10   | 99,90  |      |
|     |                                |                                | 656 | 100,00 |        |        |        | 99,94  |        | 0,06   |      |
|     |                                |                                | 657 |        |        |        | 100,00 |        | 0,11   | 99,89  |      |
| 220 | D(99,93 G(0,07)                | N(0,03)<br>D(99,97)            | 658 |        |        | 100,00 |        | 0,03   |        | 99,97  |      |
|     |                                |                                | 659 | 99,93  |        | 0,07   |        | 100,00 |        |        |      |
|     |                                |                                | 660 |        |        |        | 100,00 |        |        | 100,00 |      |
| 221 | A(0,13)<br>T(99,87)            | A(0,03)<br>T(99,97)            | 661 | 99,87  |        | 0,13   |        | 99,97  | 0,03   |        |      |
|     |                                |                                | 662 |        | 100,00 |        |        | 100,00 |        |        |      |
|     |                                |                                | 663 |        | 100,00 |        |        | 100,00 |        |        |      |
| 222 | R(100,00)                      | R(99,88)<br>H(0,12)            | 664 |        | 100,00 |        |        | 100,00 |        |        |      |
|     |                                |                                | 665 |        |        | 100,00 |        | 0,12   |        | 99,88  |      |
|     |                                |                                | 666 |        | 100,00 |        |        | 100,00 |        |        |      |
| 223 | R(0,07)<br>C(99,93)            | C(99,99)<br>S(0,01)            | 667 |        | 0,07   |        | 99,93  | 0,01   |        | 99,99  |      |
|     |                                |                                | 668 |        |        | 100,00 |        |        | 100,00 |        |      |
|     |                                |                                | 669 |        | 100,00 |        |        | 100,00 |        |        |      |
| 224 | F(100,00)                      | F(100,00)                      | 670 |        |        |        | 100,00 |        |        | 100,00 |      |
|     |                                |                                | 671 |        |        |        | 100,00 |        |        | 100,00 |      |
|     |                                |                                | 672 |        |        |        | 100,00 |        |        | 100,00 |      |
| 225 | D(99,84)<br>G(0,16)            | D(99,82)<br>G(0,16)<br>V(0,02) | 673 |        |        | 100,00 |        |        | 100,00 |        |      |
|     |                                |                                | 674 | 99,84  |        | 0,16   |        | 99,82  |        | 0,16   | 0,02 |
|     |                                |                                | 675 |        | 100,00 |        |        | 100,00 |        |        |      |
| 226 | S(100,00)                      | S(100,00)                      | 676 |        |        |        | 100,00 |        |        | 100,00 |      |
|     |                                |                                | 677 |        | 100,00 |        |        | 100,00 |        |        |      |
|     |                                |                                | 678 |        | 100,00 |        |        | 100,00 |        |        |      |
| 227 | A(0,07)<br>T(99,93)            | A(0,16)<br>T(99,84)            | 679 | 99,93  |        | 0,07   |        | 99,84  | 0,16   |        |      |
|     |                                |                                | 680 |        | 100,00 |        |        | 100,00 |        |        |      |
|     |                                |                                | 681 | 83,95  |        | 16,05  |        | 99,97  |        | 0,03   |      |
| 228 | A(0,12)<br>V(99,88)            | A(0,62)<br>V(99,38)            | 682 |        |        | 100,00 |        |        | 100,00 |        |      |
|     |                                |                                | 683 |        | 0,12   |        | 99,88  |        | 0,62   | 99,38  |      |
|     |                                |                                | 684 |        | 100,00 |        |        | 100,00 |        |        |      |
| 229 | T(100,00)                      | A(0,15)<br>T(99,85)            | 685 | 100,00 |        |        |        | 99,85  | 0,15   |        |      |
|     |                                |                                | 686 |        | 100,00 |        |        | 100,00 |        |        |      |
|     |                                |                                | 687 |        | 0,09   |        | 99,91  |        | 0,04   | 99,96  |      |
| 230 | E(100,00)                      | E(99,50)<br>V(0,04)<br>X(0,46) | 688 |        |        | 100,00 |        |        | 99,53  |        |      |
|     |                                |                                | 689 | 100,00 |        |        |        | 99,50  |        | 0,04   |      |
|     |                                |                                | 690 |        |        | 100,00 |        |        | 100,00 |        |      |
| 231 | N(0,17)<br>S(99,54)<br>X(0,29) | S(100,00)                      | 691 | 99,71  |        |        |        | 100,00 |        |        |      |
|     |                                |                                | 692 |        | 0,17   | 99,54  |        |        | 100,00 |        |      |
|     |                                |                                | 693 |        | 76,22  |        | 23,78  |        | 99,98  | 0,02   |      |
| 232 | D(100,00)                      | D(100,00)                      | 694 |        |        | 100,00 |        |        | 100,00 |        |      |
|     |                                |                                | 695 | 100,00 |        |        |        | 100,00 |        |        |      |
|     |                                |                                | 696 |        | 100,00 |        |        | 100,00 |        |        |      |
| 233 | I(100,00)                      | I(99,88)<br>V(0,12)            | 697 | 100,00 |        |        |        | 99,88  | 0,12   |        |      |
|     |                                |                                | 698 |        |        |        | 100,00 |        |        | 100,00 |      |
|     |                                |                                | 699 |        | 100,00 |        |        | 100,00 |        |        |      |
| 234 | R(99,93)<br>H(0,07)            | R(99,97)<br>H(0,03)            | 700 |        | 100,00 |        |        | 100,00 |        |        |      |
|     |                                |                                | 701 | 0,07   |        | 99,93  |        | 0,03   | 99,97  |        |      |
|     |                                |                                | 702 |        |        | 100,00 |        | 0,07   |        | 99,93  |      |
| 235 | T(100,00)                      | A(0,15)<br>T(99,85)            | 703 | 100,00 |        |        |        | 99,85  | 0,15   |        |      |
|     |                                |                                | 704 |        | 100,00 |        |        | 100,00 |        |        |      |
|     |                                |                                | 705 |        |        | 100,00 |        |        | 100,00 |        |      |
| 236 | E(100,00)                      | E(100,00)                      | 706 |        |        | 100,00 |        |        | 100,00 |        |      |
|     |                                |                                | 707 | 100,00 |        |        |        | 100,00 |        |        |      |
|     |                                |                                | 708 |        |        | 100,00 |        |        | 100,00 |        |      |
| 237 | E(100,00)                      | E(100,00)                      | 709 |        |        | 100,00 |        |        | 100,00 |        |      |

|     |                     |                                           |     |        |        |        |        |        |        |        |        |
|-----|---------------------|-------------------------------------------|-----|--------|--------|--------|--------|--------|--------|--------|--------|
|     |                     |                                           | 710 | 100,00 |        |        |        | 100,00 |        |        |        |
|     |                     |                                           | 711 | 100,00 |        |        |        | 100,00 |        |        |        |
| 238 | A(100,00)           | A(99,95)<br>T(0,05)                       | 712 |        |        | 100,00 |        | 0,05   |        | 99,95  |        |
|     |                     |                                           | 713 |        | 100,00 |        |        | 100,00 |        |        |        |
|     |                     |                                           | 714 | 99,91  |        | 0,09   |        | 100,00 |        |        |        |
| 239 | I(99,91) T(0,09)    | I(99,97)<br>V(0,03)                       | 715 | 100,00 |        |        |        | 99,97  |        | 0,03   |        |
|     |                     |                                           | 716 |        | 0,09   |        | 99,91  |        |        | 100,00 |        |
|     |                     |                                           | 717 |        | 100,00 |        |        | 100,00 |        |        |        |
| 240 | Y(100,00)           | H(0,15)<br>Y(99,85)                       | 718 |        |        |        | 100,00 |        | 0,15   |        | 99,85  |
|     |                     |                                           | 719 | 100,00 |        |        |        | 100,00 |        |        |        |
|     |                     |                                           | 720 |        | 100,00 |        |        | 99,95  |        | 0,05   |        |
| 241 | Q(100,00)           | R(0,14)<br>Q(99,81)<br>L(0,02)<br>*(0,03) | 721 |        | 100,00 |        |        |        | 99,97  |        | 0,03   |
|     |                     |                                           | 722 | 100,00 |        |        |        | 99,84  |        | 0,13   | 0,02   |
|     |                     |                                           | 723 |        |        | 100,00 |        |        |        | 100,00 |        |
| 242 | C(100,00)           | R(0,06)<br>C(99,90)<br>Y(0,04)            | 724 |        |        |        | 100,00 |        | 0,05   |        | 99,95  |
|     |                     |                                           | 725 |        |        | 100,00 |        | 0,04   |        | 99,96  |        |
|     |                     |                                           | 726 |        | 0,12   |        | 99,88  |        | 0,20   | 99,80  |        |
| 243 | R(0,12)<br>C(99,88) | C(99,93)<br>Y(0,05)<br>*(0,02)            | 727 |        | 0,12   |        | 99,88  |        |        |        | 100,00 |
|     |                     |                                           | 728 |        |        | 100,00 |        | 0,05   |        | 99,95  |        |
|     |                     |                                           | 729 |        | 0,07   |        | 99,93  | 0,02   | 0,19   | 99,79  |        |
| 244 | D(99,80)<br>G(0,20) | D(100,00)                                 | 730 |        |        | 100,00 |        |        |        | 100,00 |        |
|     |                     |                                           | 731 | 99,80  |        | 0,20   |        | 100,00 |        |        |        |
|     |                     |                                           | 732 |        | 99,90  |        | 0,10   |        | 99,97  |        | 0,03   |
| 245 | L(100,00)           | L(100,00)                                 | 733 |        | 100,00 |        |        |        | 100,00 |        |        |
|     |                     |                                           | 734 |        |        |        | 100,00 |        |        |        | 100,00 |
|     |                     |                                           | 735 |        |        | 100,00 |        |        |        | 100,00 |        |
| 246 | D(100,00)           | D(100,00)                                 | 736 |        |        | 100,00 |        |        |        | 100,00 |        |
|     |                     |                                           | 737 | 100,00 |        |        |        | 100,00 |        |        |        |
|     |                     |                                           | 738 |        | 100,00 |        |        | 100,00 |        |        |        |
| 247 | P(100,00)           | P(100,00)                                 | 739 |        | 100,00 |        |        |        | 100,00 |        |        |
|     |                     |                                           | 740 |        | 100,00 |        |        |        | 100,00 |        |        |
|     |                     |                                           | 741 |        | 100,00 |        |        |        | 100,00 |        |        |
| 248 | Q(100,00)           | R(0,12)<br>Q(99,88)                       | 742 |        | 100,00 |        |        |        | 100,00 |        |        |
|     |                     |                                           | 743 | 100,00 |        |        |        | 99,88  |        | 0,12   |        |
|     |                     |                                           | 744 | 100,00 |        |        |        | 100,00 |        |        |        |
| 249 | A(100,00)           | A(100,00)                                 | 745 |        |        | 100,00 |        |        |        | 100,00 |        |
|     |                     |                                           | 746 |        | 100,00 |        |        |        | 100,00 |        |        |
|     |                     |                                           | 747 |        | 100,00 |        |        | 99,94  |        | 0,06   |        |
| 250 | R(100,00)           | R(99,98)<br>H(0,02)                       | 748 |        | 100,00 |        |        |        | 100,00 |        |        |
|     |                     |                                           | 749 |        |        | 100,00 |        | 0,02   |        | 99,98  |        |
|     |                     |                                           | 750 |        | 0,07   |        | 99,93  |        | 0,12   | 99,88  |        |
| 251 | V(100,00)           | A(0,17)<br>M(0,04)<br>V(99,79)            | 751 |        |        | 100,00 |        | 0,04   |        | 99,96  |        |
|     |                     |                                           | 752 |        |        |        | 100,00 |        |        | 0,17   | 99,83  |
|     |                     |                                           | 753 |        |        | 100,00 |        |        |        | 100,00 |        |
| 252 | A(100,00)           | A(100,00)                                 | 754 |        |        | 100,00 |        |        |        | 100,00 |        |
|     |                     |                                           | 755 |        | 100,00 |        |        |        | 100,00 |        |        |
|     |                     |                                           | 756 |        | 100,00 |        |        | 100,00 |        |        |        |
| 253 | I(100,00)           | I(99,71)<br>T(0,13)<br>V(0,16)            | 757 | 100,00 |        |        |        | 99,84  |        | 0,16   |        |
|     |                     |                                           | 758 |        |        |        | 100,00 |        | 0,13   |        | 99,87  |
|     |                     |                                           | 759 |        | 100,00 |        |        | 100,00 |        |        |        |
| 254 | K(100,00)           | R(0,03)<br>K(99,97)                       | 760 | 100,00 |        |        |        | 100,00 |        |        |        |
|     |                     |                                           | 761 | 100,00 |        |        |        | 99,97  |        | 0,03   |        |
|     |                     |                                           | 762 |        |        | 100,00 |        |        | 100,00 |        |        |
| 255 | S(100,00)           | S(100,00)                                 | 763 |        |        |        | 100,00 |        |        |        | 100,00 |
|     |                     |                                           | 764 |        | 100,00 |        |        |        | 100,00 |        |        |
|     |                     |                                           | 765 |        | 100,00 |        |        | 100,00 |        |        |        |
| 256 | L(100,00)           | L(100,00)                                 | 766 |        | 100,00 |        |        |        | 100,00 |        |        |
|     |                     |                                           | 767 |        |        |        | 100,00 |        |        |        | 100,00 |
|     |                     |                                           | 768 |        | 100,00 |        |        |        |        |        | 100,00 |
| 257 | T(100,00)           | A(0,07)<br>T(99,93)                       | 769 | 100,00 |        |        |        | 99,93  |        | 0,07   |        |
|     |                     |                                           | 770 |        | 100,00 |        |        |        | 100,00 |        |        |

|     |                     |                                |     |        |        |        |        |        |        |        |        |
|-----|---------------------|--------------------------------|-----|--------|--------|--------|--------|--------|--------|--------|--------|
|     |                     |                                | 771 |        |        |        | 100,00 |        |        |        | 100,00 |
|     |                     |                                | 772 |        |        | 100,00 |        |        |        | 100,00 |        |
| 258 | E(100,00)           | E(100,00)                      | 773 | 100,00 |        |        |        | 100,00 |        |        |        |
|     |                     |                                | 774 |        |        | 100,00 |        |        |        | 100,00 |        |
|     |                     |                                | 775 | 100,00 |        |        |        | 99,94  |        | 0,06   |        |
| 259 | R(100,00)           | R(99,94)<br>G(0,06)            | 776 |        |        | 100,00 |        |        |        | 100,00 |        |
|     |                     |                                | 777 |        |        | 100,00 |        |        |        | 100,00 |        |
|     |                     |                                | 778 |        | 100,00 |        |        |        | 100,00 |        |        |
| 260 | L(100,00)           | L(100,00)                      | 779 |        |        |        | 100,00 |        |        |        | 100,00 |
|     |                     |                                | 780 |        |        |        | 100,00 |        |        |        | 100,00 |
|     |                     |                                | 781 |        |        |        | 100,00 |        |        |        | 100,00 |
| 261 | Y(100,00)           | Y(100,00)                      | 782 | 100,00 |        |        |        | 100,00 |        |        |        |
|     |                     |                                | 783 |        |        |        | 100,00 |        | 0,16   |        | 99,84  |
|     |                     |                                | 784 |        |        | 100,00 |        |        |        | 100,00 |        |
| 262 | A(0,09)<br>V(99,91) | V(100,00)                      | 785 |        | 0,09   |        | 99,91  |        |        |        | 100,00 |
|     |                     |                                | 786 |        |        |        | 100,00 |        |        |        | 100,00 |
|     |                     |                                | 787 |        |        | 100,00 |        |        |        | 100,00 |        |
| 263 | G(100,00)           | G(100,00)                      | 788 |        |        | 100,00 |        |        |        | 100,00 |        |
|     |                     |                                | 789 |        |        | 100,00 |        |        |        | 100,00 |        |
|     |                     |                                | 790 |        |        | 100,00 |        |        |        | 100,00 |        |
| 264 | G(100,00)           | G(100,00)                      | 791 |        |        | 100,00 |        |        |        | 100,00 |        |
|     |                     |                                | 792 |        | 100,00 |        |        |        | 100,00 |        |        |
|     |                     |                                | 793 |        | 100,00 |        |        |        | 100,00 |        |        |
| 265 | P(100,00)           | P(100,00)                      | 794 |        | 100,00 |        |        |        | 100,00 |        |        |
|     |                     |                                | 795 |        |        |        | 100,00 |        |        |        | 100,00 |
|     |                     |                                | 796 |        | 100,00 |        |        |        | 100,00 |        |        |
| 266 | L(100,00)           | R(0,01)<br>L(99,99)            | 797 |        |        |        | 100,00 |        |        | 0,01   | 99,99  |
|     |                     |                                | 798 |        |        |        | 100,00 |        | 0,06   |        | 99,94  |
|     |                     |                                | 799 | 100,00 |        |        |        | 100,00 |        |        |        |
| 267 | T(100,00)           | T(100,00)                      | 800 |        | 100,00 |        |        |        | 100,00 |        |        |
|     |                     |                                | 801 |        | 100,00 |        |        |        | 100,00 |        |        |
|     |                     |                                | 802 | 100,00 |        |        |        | 100,00 |        |        |        |
| 268 | N(100,00)           | N(100,00)                      | 803 | 100,00 |        |        |        | 100,00 |        |        |        |
|     |                     |                                | 804 |        | 100,00 |        |        |        |        |        | 100,00 |
|     |                     |                                | 805 |        | 0,09   |        | 99,91  |        |        |        | 100,00 |
| 269 | P(0,09) S(99,91)    | S(100,00)                      | 806 |        | 100,00 |        |        |        | 100,00 |        |        |
|     |                     |                                | 807 | 100,00 |        |        |        | 99,92  |        | 0,08   |        |
|     |                     |                                | 808 | 100,00 |        |        |        | 100,00 |        |        |        |
| 270 | R(100,00)           | R(100,00)                      | 809 |        |        | 100,00 |        |        |        | 100,00 |        |
|     |                     |                                | 810 |        |        | 100,00 |        |        |        | 100,00 |        |
|     |                     |                                | 811 |        |        | 100,00 |        |        |        | 100,00 |        |
| 271 | G(100,00)           | G(100,00)                      | 812 |        |        | 100,00 |        |        |        | 100,00 |        |
|     |                     |                                | 813 |        |        | 100,00 |        |        |        | 100,00 |        |
|     |                     |                                | 814 |        |        | 100,00 |        |        |        | 100,00 |        |
| 272 | E(100,00)           | E(100,00)                      | 815 | 100,00 |        |        |        | 100,00 |        |        |        |
|     |                     |                                | 816 |        |        | 100,00 |        |        |        | 100,00 |        |
|     |                     |                                | 817 | 100,00 |        |        |        | 100,00 |        |        |        |
| 273 | N(100,00)           | N(100,00)                      | 818 | 100,00 |        |        |        | 100,00 |        |        |        |
|     |                     |                                | 819 |        | 100,00 |        |        |        | 100,00 |        |        |
|     |                     |                                | 820 |        |        |        | 100,00 |        |        |        | 100,00 |
| 274 | C(100,00)           | C(99,93)<br>Y(0,07)            | 821 |        |        | 100,00 |        | 0,07   |        | 99,93  |        |
|     |                     |                                | 822 |        | 100,00 |        |        |        | 99,99  |        | 0,01   |
|     |                     |                                | 823 |        |        | 100,00 |        |        |        | 100,00 |        |
| 275 | G(100,00)           | D(0,05)<br>G(99,95)            | 824 |        |        | 100,00 |        | 0,05   |        | 99,95  |        |
|     |                     |                                | 825 |        | 100,00 |        |        |        | 100,00 |        |        |
|     |                     |                                | 826 |        |        |        | 100,00 |        | 0,03   |        | 99,97  |
| 276 | Y(100,00)           | C(0,10)<br>H(0,03)<br>Y(99,87) | 827 | 100,00 |        |        |        | 99,90  |        | 0,10   |        |
|     |                     |                                | 828 |        | 4,88   |        | 95,12  |        |        |        | 100,00 |
|     |                     |                                | 829 |        | 100,00 |        |        |        | 99,94  |        | 0,06   |
| 277 | R(100,00)           | R(99,86)<br>C(0,06)<br>H(0,08) | 830 |        |        | 100,00 |        | 0,08   |        | 99,92  |        |
|     |                     |                                | 831 |        | 97,18  |        | 2,82   |        | 99,97  |        | 0,03   |
| 278 | R(100,00)           | R(100,00)                      | 832 | 100,00 |        |        |        | 100,00 |        |        |        |

|     |                     |                                           |     |        |        |        |        |        |        |        |        |
|-----|---------------------|-------------------------------------------|-----|--------|--------|--------|--------|--------|--------|--------|--------|
|     |                     |                                           | 833 |        |        | 100,00 |        |        |        | 100,00 |        |
|     |                     |                                           | 834 |        |        | 100,00 |        |        |        | 100,00 |        |
| 279 | C(100,00)           | C(100,00)                                 | 835 |        |        |        | 100,00 |        |        |        | 100,00 |
|     |                     |                                           | 836 |        |        | 100,00 |        |        |        | 100,00 |        |
|     |                     |                                           | 837 |        | 100,00 |        |        |        | 100,00 |        |        |
| 280 | R(100,00)           | R(99,91)<br>H(0,09)                       | 838 |        | 100,00 |        |        |        | 100,00 |        |        |
|     |                     |                                           | 839 |        |        | 100,00 |        | 0,09   |        | 99,91  |        |
|     |                     |                                           | 840 |        | 100,00 |        |        |        | 99,92  |        | 0,08   |
| 281 | A(100)              | A(99,89)<br>T(0,03)<br>V(0,08)            | 841 |        |        | 100,00 |        | 0,03   |        | 99,97  |        |
|     |                     |                                           | 842 |        | 100,00 |        |        |        | 99,92  |        | 0,08   |
|     |                     |                                           | 843 | 0,07   |        | 99,93  |        |        |        | 100,00 |        |
| 282 | S(100,00)           | G(0,07)<br>S(99,93)                       | 844 | 100,00 |        |        |        | 99,93  |        | 0,07   |        |
|     |                     |                                           | 845 |        |        | 100,00 |        |        |        | 100,00 |        |
|     |                     |                                           | 846 |        | 100,00 |        |        |        | 99,94  |        | 0,06   |
| 283 | G(100,00)           | G(100,00)                                 | 847 |        |        | 100,00 |        |        |        | 100,00 |        |
|     |                     |                                           | 848 |        |        | 100,00 |        |        |        | 100,00 |        |
|     |                     |                                           | 849 |        | 100,00 |        |        |        | 100,00 |        |        |
| 284 | V(100,00)           | A(0,10)<br>I(0,07)<br>V(99,83)            | 850 |        |        | 100,00 |        | 0,07   |        | 99,93  |        |
|     |                     |                                           | 851 |        |        |        | 100,00 |        | 0,10   |        | 99,90  |
|     |                     |                                           | 852 | 100,00 |        |        |        | 100,00 |        |        |        |
| 285 | L(100,00)           | L(100,00)                                 | 853 |        | 100,00 |        |        |        | 100,00 |        |        |
|     |                     |                                           | 854 |        |        |        | 100,00 |        |        |        | 100,00 |
|     |                     |                                           | 855 |        |        | 100,00 |        |        |        | 100,00 |        |
| 286 | A(0,13)<br>T(99,87) | T(100,00)                                 | 856 | 99,87  |        | 0,13   |        | 100,00 |        |        |        |
|     |                     |                                           | 857 |        | 100,00 |        |        |        | 100,00 |        |        |
|     |                     |                                           | 858 | 100,00 |        |        |        | 99,83  |        | 0,17   |        |
| 287 | T(100,00)           | T(100,00)                                 | 859 | 100,00 |        |        |        | 100,00 |        |        |        |
|     |                     |                                           | 860 |        | 100,00 |        |        |        | 100,00 |        |        |
|     |                     |                                           | 861 |        | 100,00 |        |        |        | 100,00 |        |        |
| 288 | S(100,00)           | C(0,02)<br>G(0,08)<br>S(99,90)            | 862 | 100,00 |        |        |        | 99,90  |        | 0,08   | 0,02   |
|     |                     |                                           | 863 |        |        | 100,00 |        |        |        | 100,00 |        |
|     |                     |                                           | 864 |        | 100,00 |        |        |        | 99,97  |        | 0,03   |
| 289 | C(100,00)           | R(0,25)<br>C(99,68)<br>S(0,03)<br>Y(0,04) | 865 |        |        |        | 100,00 | 0,03   | 0,25   |        | 99,71  |
|     |                     |                                           | 866 |        |        |        |        | 0,04   |        | 99,96  |        |
|     |                     |                                           | 867 |        |        |        | 100,00 |        | 0,13   |        | 99,87  |
| 290 | G(100,00)           | D(0,14)<br>G(99,86)                       | 868 |        |        | 100,00 |        |        |        | 100,00 |        |
|     |                     |                                           | 869 |        |        | 100,00 |        | 0,14   |        | 99,86  |        |
|     |                     |                                           | 870 |        |        |        | 100,00 |        | 0,01   |        | 99,99  |
| 291 | N(100,00)           | N(99,83)<br>D(0,17)                       | 871 | 100,00 |        |        |        | 99,83  |        | 0,17   |        |
|     |                     |                                           | 872 | 100,00 |        |        |        | 100,00 |        |        |        |
|     |                     |                                           | 873 |        | 100,00 |        |        |        | 99,93  |        | 0,07   |
| 292 | A(0,07)<br>T(99,93) | A(0,25)<br>T(99,75)                       | 874 | 99,93  |        | 0,07   |        | 99,75  |        | 0,25   |        |
|     |                     |                                           | 875 |        | 100,00 |        |        |        | 100,00 |        |        |
|     |                     |                                           | 876 |        | 100,00 |        |        |        | 100,00 |        |        |
| 293 | L(100,00)           | L(100,00)                                 | 877 |        | 100,00 |        |        |        | 100,00 |        |        |
|     |                     |                                           | 878 |        |        |        | 100,00 |        |        |        | 100,00 |
|     |                     |                                           | 879 |        | 83,17  |        | 16,83  |        | 99,96  |        | 0,04   |
| 294 | T(100,00)           | A(0,11)<br>T(99,89)                       | 880 | 100,00 |        |        |        | 99,89  |        | 0,11   |        |
|     |                     |                                           | 881 |        | 100,00 |        |        |        | 100,00 |        |        |
|     |                     |                                           | 882 |        |        |        | 100,00 |        |        |        | 100,00 |
| 295 | C(100,00)           | C(99,95)<br>Y(0,05)                       | 883 |        |        |        | 100,00 |        |        |        | 100,00 |
|     |                     |                                           | 884 |        |        | 100,00 |        | 0,05   |        | 99,95  |        |
|     |                     |                                           | 885 |        | 100,00 |        |        |        | 100,00 |        |        |
| 296 | Y(100,00)           | C(0,18)<br>H(0,09)<br>Y(99,74)            | 886 |        |        |        | 100,00 |        | 0,09   |        | 99,91  |
|     |                     |                                           | 887 | 100,00 |        |        |        | 99,82  |        | 0,18   |        |
|     |                     |                                           | 888 |        | 100,00 |        |        |        | 100,00 |        |        |
| 297 | I(99,76) V(0,13)    | I(99,95)<br>V(0,05)                       | 889 | 99,87  |        | 0,13   |        | 99,95  |        | 0,05   |        |
|     |                     |                                           | 890 |        | 0,12   |        | 99,88  |        |        |        | 100,00 |
|     |                     |                                           | 891 |        | 100,00 |        |        |        | 100,00 |        |        |
| 298 | E(0,09)<br>K(99,91) | K(100,00)                                 | 892 | 99,91  |        | 0,09   |        | 100,00 |        |        |        |
|     |                     |                                           | 893 | 100,00 |        |        |        | 100,00 |        |        |        |

|     |                     |                                |     |        |        |        |        |        |        |        |        |
|-----|---------------------|--------------------------------|-----|--------|--------|--------|--------|--------|--------|--------|--------|
|     |                     |                                | 894 |        |        | 100,00 |        |        |        | 100,00 |        |
|     |                     |                                | 895 |        |        | 100,00 |        |        |        | 100,00 |        |
| 299 | A(100,00)           | A(100,00)                      | 896 |        | 100,00 |        |        |        | 100,00 |        |        |
|     |                     |                                | 897 |        | 100,00 |        |        |        | 99,97  |        | 0,03   |
|     |                     |                                | 898 |        | 100,00 |        |        |        | 100,00 |        |        |
| 300 | R(100,00)           | R(100,00)                      | 899 |        |        | 100,00 |        |        |        | 100,00 |        |
|     |                     |                                | 900 | 100,00 |        |        |        | 75,12  |        | 24,85  | 0,03   |
|     |                     |                                | 901 |        |        | 100,00 |        |        |        | 100,00 |        |
| 301 | A(100,00)           | A(99,96)<br>V(0,04)            | 902 |        | 100,00 |        |        |        | 99,96  |        | 0,04   |
|     |                     |                                | 903 | 100,00 |        |        |        | 99,88  |        | 0,12   |        |
|     |                     |                                | 904 |        |        | 100,00 |        |        |        | 100,00 |        |
| 302 | A(100,00)           | A(100,00)                      | 905 |        | 100,00 |        |        |        | 100,00 |        |        |
|     |                     |                                | 906 |        | 100,00 |        |        |        | 100,00 |        |        |
|     |                     |                                | 907 |        |        |        | 100,00 | 0,01   |        |        | 99,99  |
| 303 | C(100,00)           | C(99,99)<br>S(0,01)            | 908 |        |        | 100,00 |        |        |        | 100,00 |        |
|     |                     |                                | 909 |        |        |        | 100,00 | 0,39   |        |        | 99,61  |
|     |                     |                                | 910 |        | 100,00 |        |        |        | 99,91  |        | 0,09   |
| 304 | R(100,00)           | R(99,77)<br>Q(0,14)<br>*(0,09) | 911 |        |        | 100,00 |        | 0,14   |        | 99,86  |        |
|     |                     |                                | 912 | 100,00 |        |        |        | 100,00 |        |        |        |
|     |                     |                                | 913 |        |        | 100,00 |        |        |        | 100,00 |        |
| 305 | A(99,91)<br>V(0,09) | A(99,99)<br>V(0,01)            | 914 |        | 99,91  |        | 0,09   |        | 99,99  |        | 0,01   |
|     |                     |                                | 915 |        | 100,00 |        |        |        | 99,93  |        | 0,07   |
|     |                     |                                | 916 | 0,17   |        | 99,83  |        | 0,05   |        | 99,95  |        |
| 306 | A(99,83)<br>T(0,17) | A(99,94)<br>T(0,05)<br>V(0,01) | 917 |        | 100,00 |        |        |        | 99,99  |        | 0,01   |
|     |                     |                                | 918 | 100,00 |        |        |        | 100,00 |        |        |        |
|     |                     |                                | 919 |        |        | 100,00 |        |        |        | 100,00 |        |
| 307 | G(100,00)           | G(100,00)                      | 920 |        |        | 100,00 |        |        |        | 100,00 |        |
|     |                     |                                | 921 |        |        | 100,00 |        |        |        | 100,00 |        |
|     |                     |                                | 922 |        | 100,00 |        |        |        | 100,00 |        |        |
| 308 | L(100,00)           | L(100,00)                      | 923 |        |        |        | 100,00 |        |        |        | 100,00 |
|     |                     |                                | 924 |        | 100,00 |        |        |        | 100,00 |        |        |
|     |                     |                                | 925 |        | 100,00 |        |        |        | 99,95  |        | 0,05   |
| 309 | R(100,00)           | R(99,95)<br>W(0,05)            | 926 |        |        | 100,00 |        |        |        | 100,00 |        |
|     |                     |                                | 927 |        |        | 100,00 |        |        |        | 100,00 |        |
|     |                     |                                | 928 |        |        | 100,00 |        |        |        | 100,00 |        |
| 310 | D(99,93)G(0,07)     | D(100,00)                      | 929 | 99,93  |        | 0,07   |        | 100,00 |        |        |        |
|     |                     |                                | 930 |        | 100,00 |        |        |        | 99,94  |        | 0,06   |
|     |                     |                                | 931 |        |        |        | 100,00 | 0,03   | 0,23   |        | 99,74  |
| 311 | C(100,00)           | R(0,23)<br>C(99,74)<br>S(0,03) | 932 |        |        |        |        |        |        | 100,00 |        |
|     |                     |                                | 933 |        | 100,00 |        |        |        | 99,99  |        | 0,01   |
|     |                     |                                | 934 | 99,91  |        | 0,09   |        | 99,80  |        | 0,20   |        |
| 312 | A(0,09)<br>T(99,91) | A(0,20)<br>I(0,06)<br>T(99,74) | 935 |        | 100,00 |        |        |        | 99,94  |        | 0,06   |
|     |                     |                                | 936 |        | 100,00 |        |        |        | 100,00 |        |        |
|     |                     |                                | 937 | 100,00 |        |        |        | 99,91  |        | 0,09   |        |
| 313 | M(99,93)<br>T(0,07) | M(99,74)<br>T(0,17)<br>V(0,09) | 938 |        | 0,07   |        | 99,93  |        | 0,17   |        | 99,83  |
|     |                     |                                | 939 |        |        | 100,00 |        |        |        | 100,00 |        |
|     |                     |                                | 940 |        | 100,00 |        |        |        | 99,93  |        | 0,07   |
| 314 | L(100,00)           | L(99,51)<br>F(0,07)<br>P(0,41) | 941 |        |        |        | 100,00 |        | 0,41   |        | 99,59  |
|     |                     |                                | 942 |        | 99,91  |        | 0,09   |        | 99,91  |        | 0,09   |
|     |                     |                                | 943 |        |        | 100,00 |        |        |        | 100,00 |        |
| 315 | V(100,00)           | A(0,20)<br>V(99,80)            | 944 |        |        |        | 100,00 |        | 0,20   |        | 99,80  |
|     |                     |                                | 945 |        |        | 100,00 |        | 0,02   |        | 99,98  |        |
|     |                     |                                | 946 |        | 0,07   |        | 99,93  |        | 0,05   |        | 99,95  |
| 316 | R(0,07)<br>C(99,93) | R(0,05)<br>C(99,92)<br>*(0,03) | 947 |        |        | 100,00 |        |        |        | 100,00 |        |
|     |                     |                                | 948 |        |        |        | 100,00 | 0,03   |        |        | 99,97  |
|     |                     |                                | 949 |        |        | 100,00 |        |        |        | 100,00 |        |
| 317 | G(100,00)           | D(0,07)<br>G(99,93)            | 950 |        |        | 100,00 |        | 0,07   |        | 99,93  |        |
|     |                     |                                | 951 |        | 100,00 |        |        |        | 99,90  |        | 0,10   |
|     |                     |                                | 952 |        |        | 100,00 |        |        |        | 100,00 |        |
| 318 | D(100,00)           | D(99,86)<br>G(0,14)            | 953 | 100,00 |        |        |        | 99,86  |        | 0,14   |        |
|     |                     |                                | 954 |        | 100,00 |        |        |        | 100,00 |        |        |
| 319 | D(100,00)           |                                | 955 |        |        | 100,00 |        | 0,14   |        | 99,86  |        |

|            |                             |                                |                                           |                         |        |                            |                  |                       |  |                           |                  |
|------------|-----------------------------|--------------------------------|-------------------------------------------|-------------------------|--------|----------------------------|------------------|-----------------------|--|---------------------------|------------------|
|            |                             | N(0,14)<br>D(99,86)            | <b>956</b><br><b>957</b>                  | 100,00<br>100,00        |        |                            |                  | 100,00<br>100,00      |  |                           |                  |
| <b>320</b> | L(100,00)                   | L(100,00)                      | <b>958</b><br><b>959</b><br><b>960</b>    |                         |        |                            | 100,00<br>100,00 |                       |  |                           | 100,00<br>100,00 |
| <b>321</b> | V(100,00)                   | I(0,03)<br>V(99,97)            | <b>961</b><br><b>962</b><br><b>963</b>    |                         |        | 100,00<br>100,00           |                  | 0,03<br>99,82         |  | 99,97<br>0,18             |                  |
| <b>322</b> | A(0,13)<br>V(99,87)         | A(0,13)<br>I(0,05)<br>V(99,82) | <b>964</b><br><b>965</b><br><b>966</b>    |                         | 0,13   | 100,00<br>99,87<br>100,00  |                  | 0,05<br>0,13          |  | 99,95<br>99,87<br>100,00  |                  |
| <b>323</b> | I(99,81) T(0,09)<br>V(0,10) | I(99,91)<br>V(0,09)            | <b>967</b><br><b>968</b><br><b>969</b>    | 99,90<br>0,09<br>100,00 |        | 0,10<br>99,91              |                  | 99,91<br>99,96        |  | 0,09<br>100,00<br>0,04    |                  |
| <b>324</b> | R(0,09)<br>C(99,91)         | C(99,97)<br>Y(0,03)            | <b>970</b><br><b>971</b><br><b>972</b>    |                         | 0,09   | 100,00<br>100,00           |                  | 99,91<br>0,03<br>0,20 |  | 99,97<br>99,80            |                  |
| <b>325</b> | E(100,00)                   | E(100,00)                      | <b>973</b><br><b>974</b><br><b>975</b>    | 100,00<br>100,00        |        | 100,00                     |                  | 100,00<br>100,00      |  | 100,00                    |                  |
| <b>326</b> | S(100,00)                   | S(100,00)                      | <b>976</b><br><b>977</b><br><b>978</b>    | 100,00                  |        | 100,00<br>100,00           |                  | 100,00<br>0,12        |  | 100,00<br>99,88           |                  |
| <b>327</b> | A(100,00)                   | A(99,92)<br>T(0,01)<br>V(0,07) | <b>979</b><br><b>980</b><br><b>981</b>    |                         | 100,00 | 100,00<br>100,00           |                  | 0,01<br>99,93         |  | 99,99<br>100,00<br>0,07   |                  |
| <b>328</b> | G(100,00)                   | G(100,00)                      | <b>982</b><br><b>983</b><br><b>984</b>    |                         |        | 100,00<br>100,00<br>100,00 |                  | 0,01                  |  | 100,00<br>100,00<br>99,99 |                  |
| <b>329</b> | V(100,00)                   | L(0,01)<br>V(99,99)            | <b>985</b><br><b>986</b><br><b>987</b>    |                         |        | 100,00<br>100,00           |                  | 0,01<br>99,99         |  | 99,99<br>0,01             |                  |
| <b>330</b> | Q(100,00)                   | Q(99,81)<br>L(0,01)<br>*(0,18) | <b>988</b><br><b>989</b><br><b>990</b>    | 100,00                  | 100,00 | 100,00                     |                  | 99,99                 |  | 99,82<br>100,00           | 0,18<br>0,01     |
| <b>331</b> | E(100,00)                   | E(100,00)                      | <b>991</b><br><b>992</b><br><b>993</b>    | 100,00<br>100,00        |        | 100,00                     |                  | 100,00<br>100,00      |  | 100,00                    |                  |
| <b>332</b> | D(100,00)                   | D(99,65)<br>G(0,35)            | <b>994</b><br><b>995</b><br><b>996</b>    | 100,00                  | 100,00 | 100,00                     |                  | 99,65<br>97,94        |  | 100,00<br>0,35<br>2,06    |                  |
| <b>333</b> | A(100,00)                   | A(99,92)<br>V(0,08)            | <b>997</b><br><b>998</b><br><b>999</b>    |                         | 100,00 | 100,00<br>100,00           |                  | 99,92<br>0,04         |  | 100,00<br>99,96           | 0,08             |
| <b>334</b> | A(100,00)                   | A(99,96)<br>T(0,01)<br>V(0,03) | <b>1000</b><br><b>1001</b><br><b>1002</b> |                         | 100,00 | 100,00<br>100,00           |                  | 0,01<br>0,03          |  | 99,99<br>99,97            | 0,03             |
