# Supplementary material for: Late Relapse and Reinfection in HCV Patients Treated with Direct-Acting Antiviral (DAA) Drugs
Source: MDPI journal article supplement (doi:10.3390/v13061151), 2021-06-16
Supplement: s1 [file s1]

**Table S5.** Frequency of substitutions in Pt5 with respect to HCV GT1a (EF407457.1) or GT1b reference sequences (EU781827.1). The relevant amino acid and nucleotide changes between T0 and T1 are written in red.

| Pt5                    |                     |                                |                        | Pt5     |        |        |        |   |         |        |        |        |        |
|------------------------|---------------------|--------------------------------|------------------------|---------|--------|--------|--------|---|---------|--------|--------|--------|--------|
| NS5B<br>aa<br>position | T0 (1a)             | T1 (1b)                        | NS5B<br>nt<br>position | T0 (1a) |        |        |        | - | T1 (1b) |        |        |        | -      |
|                        |                     |                                |                        | A       | C      | G      | T      |   | A       | C      | G      | T      |        |
| 179                    | A(0,18)<br>V(99,82) | V(100,00)                      | 535                    |         |        | 100,00 |        |   |         |        | 100,00 |        |        |
|                        |                     |                                | 536                    |         | 0,18   |        | 99,82  |   |         |        |        | 100,00 |        |
|                        |                     |                                | 537                    |         | 100,00 |        |        |   | 100,00  |        |        |        |        |
| 180                    | G(0,40)<br>S(99,60) | S(100,00)                      | 538                    | 99,60   |        | 0,40   |        |   |         |        |        |        | 100,00 |
|                        |                     |                                | 539                    |         |        | 100,00 |        |   |         | 100,00 |        |        |        |
|                        |                     |                                | 540                    |         | 100,00 |        |        |   |         | 100,00 |        |        |        |
| 181                    | E(0,03)<br>K(99,97) | T(100,00)                      | 541                    | 99,97   |        | 0,03   |        |   | 100,00  |        |        |        |        |
|                        |                     |                                | 542                    | 100,00  |        |        |        |   |         | 100,00 |        |        |        |
|                        |                     |                                | 543                    |         |        | 100,00 |        |   |         | 100,00 |        |        |        |
| 182                    | L(100,00)           | L(100,00)                      | 544                    |         | 100,00 |        |        |   |         | 100,00 |        |        |        |
|                        |                     |                                | 545                    |         |        |        | 100,00 |   |         |        |        |        | 100,00 |
|                        |                     |                                | 546                    |         | 100,00 |        |        |   |         |        |        |        | 100,00 |
| 183                    | P(100,00)           | P(100,00)                      | 547                    |         | 100,00 |        |        |   |         | 100,00 |        |        |        |
|                        |                     |                                | 548                    |         | 100,00 |        |        |   |         | 100,00 |        |        |        |
|                        |                     |                                | 549                    |         |        |        | 100,00 |   |         |        |        |        | 100,00 |
| 184                    | V(100,00)           | Q(100,00)                      | 550                    |         |        | 100,00 |        |   |         | 100,00 |        |        |        |
|                        |                     |                                | 551                    |         |        |        | 100,00 |   | 100,00  |        |        |        |        |
|                        |                     |                                | 552                    |         |        | 100,00 |        |   |         |        | 100,00 |        |        |
| 185                    | A(100,00)           | A(99,93)<br>T(0,07)            | 553                    |         |        | 100,00 |        |   | 0,07    |        | 99,93  |        |        |
|                        |                     |                                | 554                    |         | 100,00 |        |        |   |         | 100,00 |        |        |        |
|                        |                     |                                | 555                    |         | 100,00 |        |        |   |         | 100,00 |        |        |        |
| 186                    | A(0,20)<br>V(99,80) | A(0,13)<br>V(99,87)            | 556                    |         |        | 100,00 |        |   |         |        | 100,00 |        |        |
|                        |                     |                                | 557                    |         | 0,20   |        | 99,80  |   |         | 0,13   |        | 99,87  |        |
|                        |                     |                                | 558                    |         |        | 100,00 |        |   |         |        | 100,00 |        |        |
| 187                    | M(100,00)           | M(99,86)<br>V(0,14)            | 559                    | 100,00  |        |        |        |   | 99,86   |        | 0,14   |        |        |
|                        |                     |                                | 560                    |         |        |        | 100,00 |   |         |        | 100,00 |        | 100,00 |
|                        |                     |                                | 561                    |         |        | 100,00 |        |   |         |        |        |        |        |
| 188                    | G(100,00)           | G(99,95)<br>S(0,05)            | 562                    |         |        | 100,00 |        |   | 0,05    |        | 99,95  |        |        |
|                        |                     |                                | 563                    |         |        | 100,00 |        |   |         |        | 100,00 |        |        |
|                        |                     |                                | 564                    | 100,00  |        |        |        |   |         | 100,00 |        |        |        |
| 189                    | S(100,00)           | S(100,00)                      | 565                    | 100,00  |        |        |        |   |         |        |        |        | 100,00 |
|                        |                     |                                | 566                    |         |        | 100,00 |        |   |         | 100,00 |        |        |        |
|                        |                     |                                | 567                    |         | 100,00 |        |        |   |         | 100,00 |        |        |        |
| 190                    | S(100,00)           | A(100,00)                      | 568                    |         |        |        | 100,00 |   |         |        | 100,00 |        |        |
|                        |                     |                                | 569                    |         | 100,00 |        |        |   |         | 100,00 |        |        |        |
|                        |                     |                                | 570                    |         | 100,00 |        |        |   | 99,89   |        | 0,11   |        |        |
| 191                    | C(0,08)<br>Y(99,92) | C(0,11)<br>Y(99,89)            | 571                    |         |        |        | 100,00 |   |         |        |        |        | 100,00 |
|                        |                     |                                | 572                    | 99,92   |        | 0,08   |        |   | 99,89   |        | 0,11   |        |        |
|                        |                     |                                | 573                    |         | 100,00 |        |        |   |         | 99,95  |        |        | 0,05   |
| 192                    | G(100,00)           | R(0,05)<br>G(99,95)            | 574                    |         |        | 100,00 |        |   | 0,05    |        | 99,95  |        |        |
|                        |                     |                                | 575                    |         |        | 100,00 |        |   |         |        | 100,00 |        |        |
|                        |                     |                                | 576                    | 100,00  |        |        |        |   | 100,00  |        |        |        |        |
| 193                    | F(100,00)           | F(100,00)                      | 577                    |         |        |        | 100,00 |   |         |        |        |        | 100,00 |
|                        |                     |                                | 578                    |         |        |        | 100,00 |   |         |        |        |        | 100,00 |
|                        |                     |                                | 579                    |         | 100,00 |        |        |   |         |        |        |        | 100,00 |
| 194                    | Q(100,00)           | R(0,16)<br>Q(99,84)            | 580                    |         | 100,00 |        |        |   |         | 100,00 |        |        |        |
|                        |                     |                                | 581                    | 100,00  |        |        |        |   | 99,84   |        | 0,16   |        |        |
|                        |                     |                                | 582                    | 100,00  |        |        |        |   |         |        | 100,00 |        |        |
| 195                    | Y(100,00)           | C(0,06)<br>H(0,11)<br>Y(99,83) | 583                    |         |        |        | 100,00 |   |         | 0,11   |        |        | 99,89  |
|                        |                     |                                | 584                    | 100,00  |        |        |        |   | 99,94   |        | 0,06   |        |        |
|                        |                     |                                | 585                    |         | 100,00 |        |        |   |         | 100,00 |        |        |        |
| 196                    | S(99,97)<br>T(0,03) | S(100,00)                      | 586                    | 0,03    |        |        | 99,97  |   |         |        |        |        | 100,00 |
|                        |                     |                                | 587                    |         | 100,00 |        |        |   |         | 100,00 |        |        |        |

|     |                     |                                |     |        |        |        |        |        |        |        |
|-----|---------------------|--------------------------------|-----|--------|--------|--------|--------|--------|--------|--------|
|     |                     |                                | 588 | 100,00 |        |        |        |        |        | 100,00 |
| 197 | P(99,97)<br>S(0,03) | P(100,00)                      | 589 |        | 99,97  |        | 0,03   |        | 100,00 |        |
|     |                     |                                | 590 |        | 100,00 |        |        |        | 100,00 |        |
|     |                     |                                | 591 | 99,95  |        |        | 0,05   |        |        | 100,00 |
| 198 | G(100,00)           | R(0,07)<br>G(99,93)            | 592 |        |        | 100,00 |        | 0,07   |        | 99,93  |
|     |                     |                                | 593 |        |        | 100,00 |        |        |        | 100,00 |
|     |                     |                                | 594 | 100,00 |        |        |        | 99,95  |        | 0,05   |
| 199 | Q(99,95)<br>*(0,05) | R(0,08)<br>Q(99,87)<br>*(0,05) | 595 |        | 99,95  |        | 0,05   |        | 99,95  |        |
|     |                     |                                | 596 | 100,00 |        |        |        | 99,91  |        | 0,09   |
|     |                     |                                | 597 |        |        | 100,00 |        |        | 100,00 |        |
| 200 | R(100,00)           | R(99,91)<br>W(0,09)            | 598 |        | 100,00 |        |        |        | 99,91  |        |
|     |                     |                                | 599 |        |        | 100,00 |        |        |        | 100,00 |
|     |                     |                                | 600 |        |        | 100,00 |        |        |        | 100,00 |
| 201 | V(100,00)           | A(0,16)<br>V(99,84)            | 601 |        |        | 100,00 |        |        |        | 100,00 |
|     |                     |                                | 602 |        |        |        | 100,00 |        | 0,16   |        |
|     |                     |                                | 603 |        | 0,15   |        | 99,85  |        | 100,00 | 99,84  |
| 202 | E(100,00)           | E(99,72)<br>G(0,28)            | 604 |        |        | 100,00 |        |        |        | 100,00 |
|     |                     |                                | 605 | 100,00 |        |        |        | 99,72  |        | 0,28   |
|     |                     |                                | 606 | 99,91  |        | 0,09   |        |        |        | 100,00 |
| 203 | L(0,26)<br>F(99,74) | L(0,24)<br>F(99,76)            | 607 |        | 0,26   |        | 99,74  |        | 0,24   | 99,76  |
|     |                     |                                | 608 |        |        |        | 100,00 |        |        | 100,00 |
|     |                     |                                | 609 |        | 100,00 |        |        |        | 100,00 |        |
| 204 | L(100,00)           | L(100,00)                      | 610 |        | 100,00 |        |        |        | 100,00 |        |
|     |                     |                                | 611 |        |        |        | 100,00 |        |        | 100,00 |
|     |                     |                                | 612 |        | 100,00 |        |        | 0,07   |        | 99,93  |
| 205 | A(0,17)<br>V(99,83) | A(0,11)<br>V(99,89)            | 613 |        |        | 100,00 |        |        |        | 100,00 |
|     |                     |                                | 614 |        | 0,17   |        | 99,83  |        | 0,11   | 99,89  |
|     |                     |                                | 615 |        |        | 100,00 |        |        |        | 100,00 |
| 206 | Q(99,95)<br>*(0,05) | N(99,87)<br>S(0,13)            | 616 |        | 99,95  |        | 0,05   | 100,00 |        |        |
|     |                     |                                | 617 | 100,00 |        |        |        | 99,87  |        | 0,13   |
|     |                     |                                | 618 | 100,00 |        |        |        |        | 0,08   | 99,92  |
| 207 | A(100,00)           | A(100,00)                      | 619 |        |        | 100,00 |        |        |        | 100,00 |
|     |                     |                                | 620 |        | 100,00 |        |        |        | 100,00 |        |
|     |                     |                                | 621 |        |        | 100,00 |        |        | 100,00 |        |
| 208 | R(0,13)<br>W(99,87) | W(100,00)                      | 622 |        | 0,13   |        | 99,87  |        |        | 100,00 |
|     |                     |                                | 623 |        |        | 100,00 |        |        |        | 100,00 |
|     |                     |                                | 624 |        |        | 100,00 |        |        |        | 100,00 |
| 209 | R(0,16)<br>K(99,84) | K(100,00)                      | 625 | 100,00 |        |        |        | 100,00 |        |        |
|     |                     |                                | 626 | 99,84  |        | 0,16   |        | 100,00 |        |        |
|     |                     |                                | 627 | 100,00 |        |        |        | 100,00 |        |        |
| 210 | S(100,00)           | S(100,00)                      | 628 |        |        |        | 100,00 |        |        | 100,00 |
|     |                     |                                | 629 |        | 100,00 |        |        |        | 100,00 |        |
|     |                     |                                | 630 |        | 100,00 |        |        |        |        | 100,00 |
| 211 | K(100,00)           | K(100,00)                      | 631 | 100,00 |        |        |        | 100,00 |        |        |
|     |                     |                                | 632 | 100,00 |        |        |        | 100,00 |        |        |
|     |                     |                                | 633 |        |        | 100,00 |        |        |        | 100,00 |
| 212 | K(100,00)           | K(100,00)                      | 634 | 100,00 |        |        |        | 100,00 |        |        |
|     |                     |                                | 635 | 100,00 |        |        |        | 100,00 |        |        |
|     |                     |                                | 636 |        |        | 100,00 |        | 100,00 |        |        |
| 213 | T(100,00)           | T(100,00)                      | 637 | 100,00 |        |        |        | 100,00 |        |        |
|     |                     |                                | 638 |        | 100,00 |        |        |        | 100,00 |        |
|     |                     |                                | 639 |        | 100,00 |        |        |        | 100,00 |        |
| 214 | P(100,00)           | P(100,00)                      | 640 |        | 100,00 |        |        |        | 100,00 |        |
|     |                     |                                | 641 |        | 100,00 |        |        |        | 100,00 |        |
|     |                     |                                | 642 |        |        | 100,00 |        |        | 100,00 |        |
| 215 | M(99,87)<br>T(0,13) | M(99,94)<br>V(0,06)            | 643 | 100,00 |        |        |        | 99,94  |        | 0,06   |
|     |                     |                                | 644 |        | 0,13   |        | 99,87  |        |        | 100,00 |
|     |                     |                                | 645 |        |        | 100,00 |        |        | 100,00 |        |
| 216 | G(100,00)           | G(100,00)                      | 646 |        |        | 100,00 |        |        |        | 100,00 |
|     |                     |                                | 647 |        |        | 100,00 |        |        |        | 100,00 |
|     |                     |                                | 648 |        |        | 100,00 |        |        | 100,00 |        |
| 217 | F(100,00)           | F(100,00)                      | 649 |        |        |        | 100,00 |        |        | 100,00 |

|     |                                |                                |     |        |        |        |        |        |        |        |        |
|-----|--------------------------------|--------------------------------|-----|--------|--------|--------|--------|--------|--------|--------|--------|
|     |                                |                                | 650 |        |        |        | 100,00 |        |        |        | 100,00 |
|     |                                |                                | 651 |        |        |        | 100,00 |        | 100,00 |        |        |
| 218 | S(100,00)                      | A(99,94)<br>V(0,06)            | 652 |        |        |        | 100,00 |        |        | 100,00 |        |
|     |                                |                                | 653 |        | 100,00 |        |        |        | 99,94  |        | 0,06   |
|     |                                |                                | 654 |        |        | 100,00 |        | 0,08   |        | 99,92  |        |
| 219 | C(0,09)<br>H(0,09)<br>Y(99,81) | C(0,09)<br>H(0,09)Y(<br>99,82) | 655 |        | 0,09   |        | 99,91  |        | 0,09   |        | 99,91  |
|     |                                |                                | 656 | 99,91  |        | 0,09   |        | 99,91  |        | 0,09   |        |
|     |                                |                                | 657 |        | 0,15   |        | 99,85  |        | 0,16   |        | 99,84  |
| 220 | D(99,86)<br>G(0,14)            | D(99,82)<br>G(0,18)            | 658 |        |        | 100,00 |        |        |        | 100,00 |        |
|     |                                |                                | 659 | 99,86  |        | 0,14   |        | 99,82  |        | 0,18   |        |
|     |                                |                                | 660 |        |        |        | 100,00 |        | 100,00 |        |        |
| 221 | T(100,00)                      | A(0,10)<br>T(99,90)            | 661 | 100,00 |        |        |        | 99,90  |        | 0,10   |        |
|     |                                |                                | 662 |        | 100,00 |        |        |        | 100,00 |        |        |
|     |                                |                                | 663 |        | 100,00 |        |        |        | 100,00 |        |        |
| 222 | R(99,91)<br>H(0,09)            | R(100,00)                      | 664 |        | 100,00 |        |        |        | 100,00 |        |        |
|     |                                |                                | 665 | 0,09   |        | 99,91  |        |        |        | 100,00 |        |
|     |                                |                                | 666 |        | 100,00 |        |        |        | 100,00 |        |        |
| 223 | C(100,00)                      | C(99,94)<br>Y(0,06)            | 667 |        |        |        | 100,00 |        |        |        | 100,00 |
|     |                                |                                | 668 |        |        | 100,00 |        | 0,06   |        | 99,94  |        |
|     |                                |                                | 669 |        | 100,00 |        |        |        | 0,19   |        | 99,81  |
| 224 | F(100,00)                      | F(100,00)                      | 670 |        |        |        | 100,00 |        |        |        | 100,00 |
|     |                                |                                | 671 |        |        |        | 100,00 |        |        |        | 100,00 |
|     |                                |                                | 672 |        |        |        | 100,00 |        |        |        | 100,00 |
| 225 | D(99,85)<br>G(0,15)            | D(99,83)<br>G(0,17)            | 673 |        |        | 100,00 |        |        |        | 100,00 |        |
|     |                                |                                | 674 | 99,85  |        | 0,15   |        | 99,83  |        | 0,17   |        |
|     |                                |                                | 675 |        | 100,00 |        |        |        | 100,00 |        |        |
| 226 | S(100,00)                      | P(0,20)<br>S(99,80)            | 676 |        |        |        | 100,00 |        | 0,20   |        | 99,80  |
|     |                                |                                | 677 |        | 100,00 |        |        |        | 100,00 |        |        |
|     |                                |                                | 678 |        | 100,00 |        |        | 99,89  |        | 0,11   |        |
| 227 | I(0,05)<br>T(99,95)            | A(0,11)<br>T(99,89)            | 679 | 100,00 |        |        |        | 99,89  |        | 0,11   |        |
|     |                                |                                | 680 |        | 99,95  |        | 0,05   |        | 100,00 |        |        |
|     |                                |                                | 681 | 99,88  |        | 0,12   |        | 100,00 |        |        |        |
| 228 | V(100,00)                      | A(0,19)<br>V(99,81)            | 682 |        |        | 100,00 |        |        |        | 100,00 |        |
|     |                                |                                | 683 |        |        |        | 100,00 |        | 0,19   |        | 99,81  |
|     |                                |                                | 684 |        | 100,00 |        |        |        | 100,00 |        |        |
| 229 | T(100,00)                      | A(0,16)<br>T(99,84)            | 685 | 100,00 |        |        |        | 99,84  |        | 0,16   |        |
|     |                                |                                | 686 |        | 100,00 |        |        |        | 100,00 |        |        |
|     |                                |                                | 687 |        |        |        | 100,00 |        | 0,11   |        | 99,89  |
| 230 | E(99,63)<br>X(0,37)            | E(100,00)                      | 688 |        |        | 99,63  |        |        |        | 100,00 |        |
|     |                                |                                | 689 | 99,63  |        |        |        | 100,00 |        |        |        |
|     |                                |                                | 690 |        |        | 100,00 |        |        |        | 100,00 |        |
| 231 | S(100,00)                      | N(100,00)                      | 691 | 100,00 |        |        |        | 100,00 |        |        |        |
|     |                                |                                | 692 |        |        | 100,00 |        | 100,00 |        |        |        |
|     |                                |                                | 693 |        | 100,00 |        |        |        | 0,20   |        | 99,80  |
| 232 | D(99,83)<br>G(0,17)            | D(100,00)                      | 694 |        |        | 100,00 |        |        |        | 100,00 |        |
|     |                                |                                | 695 | 99,83  |        | 0,17   |        | 100,00 |        |        |        |
|     |                                |                                | 696 |        | 0,04   |        | 99,96  |        | 0,09   |        | 99,91  |
| 233 | I(100,00)                      | I(99,88)<br>V(0,12)            | 697 | 100,00 |        |        |        | 99,88  |        | 0,12   |        |
|     |                                |                                | 698 |        |        |        | 100,00 |        |        |        | 100,00 |
|     |                                |                                | 699 |        | 100,00 |        |        |        | 100,00 |        |        |
| 234 | R(99,85)<br>C(0,15)            | R(100,00)                      | 700 |        | 99,85  |        | 0,15   |        | 100,00 |        |        |
|     |                                |                                | 701 |        |        | 100,00 |        |        |        | 100,00 |        |
|     |                                |                                | 702 |        | 0,05   |        | 99,95  |        | 0,11   |        | 99,89  |
| 235 | M(0,05)<br>T(99,95)            | A(0,57)<br>V(99,43)            | 703 | 100,00 |        |        |        |        |        | 100,00 |        |
|     |                                |                                | 704 |        | 99,95  |        | 0,05   |        | 0,57   |        | 99,43  |
|     |                                |                                | 705 |        |        | 100,00 |        |        | 0,09   |        | 99,91  |
| 236 | E(100,00)                      | E(100,00)                      | 706 |        |        | 100,00 |        |        |        | 100,00 |        |
|     |                                |                                | 707 | 100,00 |        |        |        | 100,00 |        |        |        |
|     |                                |                                | 708 |        |        | 100,00 |        |        |        | 100,00 |        |
| 237 | E(100,00)                      | E(100,00)                      | 709 |        |        | 100,00 |        |        |        | 100,00 |        |
|     |                                |                                | 710 | 100,00 |        |        |        | 100,00 |        |        |        |
|     |                                |                                | 711 |        |        | 100,00 |        |        |        | 100,00 |        |

|     |                     |                                           |     |        |        |        |        |        |        |        |        |
|-----|---------------------|-------------------------------------------|-----|--------|--------|--------|--------|--------|--------|--------|--------|
| 238 | A(100,00)           | S(100,00)                                 | 712 |        |        | 100,00 |        |        |        |        | 100,00 |
|     |                     |                                           | 713 |        | 100,00 |        |        |        | 100,00 |        |        |
|     |                     |                                           | 714 | 100,00 |        |        |        |        | 99,95  | 0,05   |        |
| 239 | I(100,00)           | I(99,95)<br>T(0,05)                       | 715 | 100,00 |        |        |        | 100,00 |        |        |        |
|     |                     |                                           | 716 |        |        |        | 100,00 |        | 0,05   |        | 99,95  |
|     |                     |                                           | 717 |        |        |        | 100,00 |        | 100,00 |        |        |
| 240 | Y(100,00)           | N(0,06)<br>C(0,11)<br>H(0,05)<br>Y(99,78) | 718 |        |        |        | 100,00 | 0,06   | 0,05   |        | 99,89  |
|     |                     |                                           | 719 | 100,00 |        |        |        | 99,89  |        | 0,11   |        |
|     |                     |                                           | 720 |        | 100,00 |        |        |        | 99,94  |        | 0,06   |
| 241 | Q(100,00)           | Q(100,00)                                 | 721 |        | 100,00 |        |        |        | 100,00 |        |        |
|     |                     |                                           | 722 | 100,00 |        |        |        | 100,00 |        |        |        |
|     |                     |                                           | 723 | 100,00 |        |        |        | 100,00 |        |        |        |
| 242 | C(100,00)           | R(0,05)<br>C(99,95)                       | 724 |        |        |        | 100,00 |        | 0,05   |        | 99,95  |
|     |                     |                                           | 725 |        |        |        |        |        |        | 100,00 |        |
|     |                     |                                           | 726 |        | 0,18   |        | 99,82  |        | 0,15   |        | 99,85  |
| 243 | C(100,00)           | R(0,11)<br>C(99,89)                       | 727 |        |        |        | 100,00 |        | 0,11   |        | 99,89  |
|     |                     |                                           | 728 |        |        |        |        |        |        | 100,00 |        |
|     |                     |                                           | 729 |        | 0,12   |        | 99,88  |        | 0,15   |        | 99,85  |
| 244 | D(99,71)<br>G(0,29) | D(87,12)<br>G(12,83)<br>V(0,05)           | 730 |        |        | 100,00 |        |        |        | 100,00 |        |
|     |                     |                                           | 731 | 99,71  |        | 0,29   |        | 87,12  |        | 12,83  | 0,05   |
|     |                     |                                           | 732 |        | 100,00 |        |        |        | 100,00 |        |        |
| 245 | L(100,00)           | L(99,62)<br>S(0,38)                       | 733 |        | 100,00 |        |        |        |        |        | 100,00 |
|     |                     |                                           | 734 |        |        |        | 100,00 |        | 0,38   |        | 99,62  |
|     |                     |                                           | 735 |        |        | 100,00 |        | 0,08   |        | 99,92  |        |
| 246 | D(100,00)           | A(100,00)                                 | 736 |        |        | 100,00 |        |        |        | 100,00 |        |
|     |                     |                                           | 737 | 100,00 |        |        |        |        | 100,00 |        |        |
|     |                     |                                           | 738 |        | 100,00 |        |        |        | 100,00 |        |        |
| 247 | P(100,00)           | P(100,00)                                 | 739 |        | 100,00 |        |        |        | 100,00 |        |        |
|     |                     |                                           | 740 |        | 100,00 |        |        |        | 100,00 |        |        |
|     |                     |                                           | 741 |        | 100,00 |        |        |        |        |        | 100,00 |
| 248 | R(0,14)<br>Q(99,86) | E(100,00)                                 | 742 |        | 100,00 |        |        |        |        | 100,00 |        |
|     |                     |                                           | 743 | 99,86  |        | 0,14   |        | 100,00 |        |        |        |
|     |                     |                                           | 744 | 100,00 |        |        |        | 100,00 |        |        |        |
| 249 | A(100,00)           | A(99,91)<br>V(0,09)                       | 745 |        |        | 100,00 |        |        |        | 100,00 |        |
|     |                     |                                           | 746 |        | 100,00 |        |        |        | 99,91  |        | 0,09   |
|     |                     |                                           | 747 |        | 100,00 |        |        |        | 100,00 |        |        |
| 250 | R(100,00)           | R(100,00)                                 | 748 |        | 100,00 |        |        | 100,00 |        |        |        |
|     |                     |                                           | 749 |        |        | 100,00 |        |        |        | 100,00 |        |
|     |                     |                                           | 750 |        | 100,00 |        |        | 99,93  |        | 0,07   |        |
| 251 | V(100,00)           | Q(100,00)                                 | 751 |        |        | 100,00 |        |        | 100,00 |        |        |
|     |                     |                                           | 752 |        |        |        | 100,00 |        |        |        |        |
|     |                     |                                           | 753 | 0,06   |        | 99,94  |        |        |        | 100,00 |        |
| 252 | A(99,95)<br>V(0,05) | A(99,92)<br>T(0,08)                       | 754 |        |        | 100,00 |        | 0,08   |        | 99,92  |        |
|     |                     |                                           | 755 |        | 99,95  |        | 0,05   |        | 100,00 |        |        |
|     |                     |                                           | 756 |        | 100,00 |        |        |        | 100,00 |        |        |
| 253 | I(99,77)<br>T(0,23) | I(99,75)<br>T(0,11)V(0,14)                | 757 | 100,00 |        |        |        | 99,86  |        | 0,14   |        |
|     |                     |                                           | 758 |        | 0,23   |        | 99,77  |        | 0,11   |        | 99,89  |
|     |                     |                                           | 759 |        | 100,00 |        |        | 100,00 |        |        |        |
| 254 | K(100,00)           | R(100,00)                                 | 760 | 100,00 |        |        |        | 100,00 |        |        |        |
|     |                     |                                           | 761 | 100,00 |        |        |        |        |        | 100,00 |        |
|     |                     |                                           | 762 |        |        | 100,00 |        | 0,06   |        | 99,94  |        |
| 255 | S(100,00)           | P(0,21)<br>S(99,79)                       | 763 |        |        |        | 100,00 |        | 0,21   |        | 99,79  |
|     |                     |                                           | 764 |        | 100,00 |        |        |        | 100,00 |        |        |
|     |                     |                                           | 765 |        | 100,00 |        |        | 0,46   |        | 99,54  |        |
| 256 | L(100,00)           | H(0,61)<br>L(99,16)<br>X(0,23)            | 766 |        | 100,00 |        |        |        | 99,77  |        |        |
|     |                     |                                           | 767 |        |        |        | 100,00 | 0,61   |        |        | 99,16  |
|     |                     |                                           | 768 |        | 100,00 |        |        |        | 100,00 |        |        |
| 257 | A(0,08)T(99,92)     | A(0,06)<br>I(0,06)<br>T(99,89)            | 769 | 99,92  |        | 0,08   |        | 99,94  |        | 0,06   |        |
|     |                     |                                           | 770 |        | 100,00 |        |        |        | 99,94  |        | 0,06   |
|     |                     |                                           | 771 |        | 100,00 |        |        | 99,86  |        |        |        |
| 258 | E(100,00) K()       |                                           | 772 |        |        | 100,00 |        |        |        | 99,86  |        |

|     |                     |                                |                   |                  |                          |                            |                  |                  |                            |                            |                  |
|-----|---------------------|--------------------------------|-------------------|------------------|--------------------------|----------------------------|------------------|------------------|----------------------------|----------------------------|------------------|
|     |                     | E(99,86)<br>X(0,14)            | 773<br>774        | 100,00           |                          | 100,00                     |                  | 100,00           |                            | 100,00                     |                  |
| 259 | R(100,00)           | R(100,00)                      | 775<br>776<br>777 | 100,00           |                          | 100,00<br>100,00           |                  |                  | 100,00                     | 100,00<br>100,00           |                  |
| 260 | L(100,00)           | L(100,00)                      | 778<br>779<br>780 |                  | 100,00                   |                            | 100,00<br>100,00 |                  | 100,00                     |                            | 100,00<br>100,00 |
| 261 | C(0,10)<br>Y(99,90) | C(0,08)<br>Y(99,92)            | 781<br>782<br>783 | 99,90            |                          | 0,10<br>100,00             |                  | 99,92<br>100,00  |                            | 0,08                       | 100,00           |
| 262 | V(100,00)           | I(100,00)                      | 784<br>785<br>786 |                  |                          | 100,00<br>100,00<br>100,00 |                  | 100,00<br>100,00 |                            |                            | 100,00           |
| 263 | G(100,00)           | G(100,00)                      | 787<br>788<br>789 |                  |                          | 100,00<br>100,00<br>100,00 |                  |                  |                            | 100,00<br>100,00<br>100,00 |                  |
| 264 | G(100,00)           | G(100,00)                      | 790<br>791<br>792 |                  |                          | 100,00<br>100,00           |                  |                  |                            | 100,00<br>100,00           |                  |
| 265 | L(0,10)<br>P(95,63) | P(100,00)                      | 793<br>794<br>795 |                  | 95,73<br>95,63<br>100,00 |                            | 0,10             |                  | 100,00<br>100,00<br>100,00 |                            |                  |
| 266 | L(100,00)           | L(100,00)                      | 796<br>797<br>798 |                  | 100,00                   |                            | 100,00<br>100,00 |                  | 100,00                     | 100,00                     | 100,00           |
| 267 | T(100,00)           | I(0,06)<br>T(99,94)            | 799<br>800<br>801 | 100,00           | 100,00<br>100,00         |                            |                  | 100,00           | 99,94<br>100,00            |                            | 0,06             |
| 268 | N(100,00)           | N(99,91)<br>S(0,09)            | 802<br>803<br>804 | 100,00<br>100,00 |                          |                            | 99,76            | 100,00<br>99,91  | 0,15                       | 0,09                       | 99,85            |
| 269 | S(100,00)           | S(100,00)                      | 805<br>806<br>807 |                  | 100,00                   |                            | 100,00           |                  | 100,00<br>100,00           |                            | 100,00           |
| 270 | R(100,00)           | K(100,00)                      | 808<br>809<br>810 | 100,00           |                          | 100,00<br>100,00           |                  | 100,00<br>100,00 |                            |                            |                  |
| 271 | G(100,00)           | G(100,00)                      | 811<br>812<br>813 |                  |                          | 100,00<br>100,00<br>100,00 |                  |                  |                            | 100,00<br>100,00<br>100,00 |                  |
| 272 | E(100,00)           | Q(100,00)                      | 814<br>815<br>816 | 100,00<br>100,00 |                          | 100,00                     |                  | 100,00           | 100,00                     |                            |                  |
| 273 | N(100,00)           | N(99,85)<br>S(0,15)            | 817<br>818<br>819 | 100,00<br>100,00 |                          |                            |                  | 100,00<br>99,85  | 100,00                     | 0,15                       |                  |
| 274 | C(100,00)           | R(0,08)<br>C(99,92)            | 820<br>821<br>822 |                  |                          | 100,00                     | 100,00<br>0,07   |                  | 0,08<br>99,95              | 100,00                     | 99,92<br>0,05    |
| 275 | G(100,00)           | G(100,00)                      | 823<br>824<br>825 |                  |                          | 100,00<br>100,00           |                  |                  | 100,00                     | 100,00<br>100,00           |                  |
| 276 | H(0,09)<br>Y(99,91) | C(0,06)<br>H(0,11)<br>Y(99,84) | 826<br>827<br>828 | 100,00           | 0,09                     |                            | 99,91<br>100,00  | 99,94            | 0,11                       | 0,06                       | 99,89<br>100,00  |
| 277 | R(100,00)           | R(100,00)                      | 829<br>830<br>831 |                  | 100,00<br>100,00         | 100,00                     |                  |                  | 100,00<br>100,00           | 100,00                     |                  |
| 278 | R(100,00)           | R(99,75)<br>Q(0,10)<br>W(0,15) | 832<br>833<br>834 | 100,00           |                          | 100,00<br>100,00           |                  | 0,10             | 99,85                      | 99,90<br>100,00            | 0,15             |

|     |                     |                                |     |        |        |        |        |        |        |        |        |
|-----|---------------------|--------------------------------|-----|--------|--------|--------|--------|--------|--------|--------|--------|
| 279 | R(0,17)<br>C(99,83) | R(0,05)<br>C(99,95)            | 835 |        | 0,17   |        | 99,83  |        | 0,05   |        | 99,95  |
|     |                     |                                | 836 |        |        | 100,00 |        |        |        | 100,00 |        |
|     |                     |                                | 837 |        | 100,00 |        |        |        | 99,95  |        | 0,05   |
| 280 | R(100,00)           | R(100,00)                      | 838 |        | 100,00 |        |        |        | 100,00 |        |        |
|     |                     |                                | 839 |        |        | 100,00 |        |        |        | 100,00 |        |
|     |                     |                                | 840 |        | 100,00 |        |        |        | 100,00 |        |        |
| 281 | A(99,86)<br>T(0,14) | A(100,00)                      | 841 | 0,14   |        | 99,86  |        |        |        | 100,00 |        |
|     |                     |                                | 842 |        | 100,00 |        |        |        | 100,00 |        |        |
|     |                     |                                | 843 |        |        | 100,00 |        | 100,00 |        |        |        |
| 282 | S(100,00)           | S(100,00)                      | 844 | 100,00 |        |        |        | 100,00 |        |        |        |
|     |                     |                                | 845 |        |        | 100,00 |        |        |        | 100,00 |        |
|     |                     |                                | 846 |        | 99,95  |        | 0,05   |        | 99,93  |        | 0,07   |
| 283 | G(100,00)           | G(100,00)                      | 847 |        |        | 100,00 |        |        |        | 100,00 |        |
|     |                     |                                | 848 |        |        | 100,00 |        |        |        | 100,00 |        |
|     |                     |                                | 849 |        | 100,00 |        |        |        | 100,00 |        |        |
| 284 | V(100,00)           | V(100,00)                      | 850 |        |        | 100,00 |        |        |        | 100,00 |        |
|     |                     |                                | 851 |        |        |        | 100,00 |        |        |        | 100,00 |
|     |                     |                                | 852 | 100,00 |        |        |        |        |        | 100,00 |        |
| 285 | L(100,00)           | L(99,88)<br>P(0,12)            | 853 |        | 100,00 |        |        |        | 100,00 |        |        |
|     |                     |                                | 854 |        |        |        | 100,00 |        | 0,12   |        | 99,88  |
|     |                     |                                | 855 |        |        | 100,00 |        | 0,07   |        | 99,93  |        |
| 286 | T(100,00)           | M(0,10)<br>T(99,90)            | 856 | 100,00 |        |        |        | 100,00 |        |        |        |
|     |                     |                                | 857 |        | 100,00 |        |        |        | 99,90  |        | 0,10   |
|     |                     |                                | 858 |        |        | 100,00 |        |        |        | 100,00 |        |
| 287 | T(100,00)           | T(100,00)                      | 859 | 100,00 |        |        |        | 100,00 |        |        |        |
|     |                     |                                | 860 |        | 100,00 |        |        |        | 100,00 |        |        |
|     |                     |                                | 861 |        |        |        | 100,00 |        | 100,00 |        |        |
| 288 | S(100,00)           | G(0,07)<br>S(99,93)            | 862 | 100,00 |        |        |        | 99,93  |        | 0,07   |        |
|     |                     |                                | 863 |        |        | 100,00 |        |        |        | 100,00 |        |
|     |                     |                                | 864 |        | 99,62  |        | 0,38   |        | 99,95  |        | 0,05   |
| 289 | C(100,00)           | R(0,11)<br>C(99,89)            | 865 |        |        |        | 100,00 |        | 0,11   |        | 99,89  |
|     |                     |                                | 866 |        |        | 100,00 |        |        |        | 100,00 |        |
|     |                     |                                | 867 |        | 0,13   |        | 99,87  |        | 100,00 |        |        |
| 290 | G(99,16)<br>S(0,84) | G(99,92)<br>S(0,08)            | 868 | 0,84   |        | 99,16  |        | 0,08   |        | 99,92  |        |
|     |                     |                                | 869 |        |        | 100,00 |        |        |        | 100,00 |        |
|     |                     |                                | 870 |        | 0,15   |        | 99,85  |        | 0,07   |        | 99,93  |
| 291 | N(100,00)           | N(99,71)<br>D(0,21)<br>S(0,08) | 871 | 100,00 |        |        |        | 99,79  |        | 0,21   |        |
|     |                     |                                | 872 | 100,00 |        |        |        | 99,92  |        | 0,08   |        |
|     |                     |                                | 873 |        | 100,00 |        |        |        | 0,05   |        | 99,95  |
| 292 | A(0,13)<br>T(99,87) | A(0,13)<br>T(99,87)            | 874 | 99,87  |        | 0,13   |        | 99,87  |        | 0,13   |        |
|     |                     |                                | 875 |        | 100,00 |        |        |        | 100,00 |        |        |
|     |                     |                                | 876 |        | 100,00 |        |        |        | 100,00 |        |        |
| 293 | L(100,00)           | L(100,00)                      | 877 |        | 100,00 |        |        |        | 100,00 |        |        |
|     |                     |                                | 878 |        |        |        | 100,00 |        |        |        | 100,00 |
|     |                     |                                | 879 |        | 100,00 |        |        |        | 100,00 |        |        |
| 294 | A(0,12)<br>T(99,88) | A(0,14)<br>T(99,86)            | 880 | 99,88  |        | 0,12   |        | 99,86  |        | 0,14   |        |
|     |                     |                                | 881 |        | 100,00 |        |        |        | 100,00 |        |        |
|     |                     |                                | 882 |        |        |        | 100,00 | 99,86  |        | 0,14   |        |
| 295 | R(0,12)<br>C(99,88) | R(0,20)<br>C(99,74)<br>Y(0,06) | 883 |        | 0,12   |        | 99,88  |        | 0,20   |        | 99,80  |
|     |                     |                                | 884 |        |        | 100,00 |        | 0,06   |        | 99,94  |        |
|     |                     |                                | 885 |        | 100,00 |        |        |        | 0,22   |        | 99,78  |
| 296 | C(0,14)<br>Y(99,86) | C(0,09)<br>H(0,09)<br>Y(99,82) | 886 |        |        |        | 100,00 |        | 0,09   |        | 99,91  |
|     |                     |                                | 887 | 99,86  |        | 0,14   |        | 99,91  |        | 0,09   |        |
|     |                     |                                | 888 |        | 99,95  |        | 0,05   |        | 100,00 |        |        |
| 297 | I(100,00)           | L(100,00)                      | 889 | 100,00 |        |        |        |        |        |        | 100,00 |
|     |                     |                                | 890 |        |        |        | 100,00 |        |        |        | 100,00 |
|     |                     |                                | 891 |        | 100,00 |        |        |        |        | 100,00 |        |
| 298 | K(100,00)           | K(100,00)                      | 892 | 100,00 |        |        |        | 100,00 |        |        |        |
|     |                     |                                | 893 | 100,00 |        |        |        | 100,00 |        |        |        |
|     |                     |                                | 894 |        |        | 100,00 |        |        |        | 100,00 |        |
| 299 | A(99,95)<br>T(0,05) | A(99,92)<br>V(0,08)            | 895 | 0,05   |        | 99,95  |        |        |        | 100,00 |        |
|     |                     |                                | 896 |        | 100,00 |        |        |        | 99,92  |        | 0,08   |

|     |                                |                                |     |        |        |        |        |        |        |        |        |
|-----|--------------------------------|--------------------------------|-----|--------|--------|--------|--------|--------|--------|--------|--------|
|     |                                |                                | 897 |        | 100,00 |        |        |        | 100,00 |        |        |
| 300 | R(2,62)<br>Q(97,38)            | A(0,18)<br>T(99,82)            | 898 |        | 100,00 |        |        |        | 99,82  | 0,18   |        |
|     |                                |                                | 899 | 97,38  |        | 2,62   |        |        | 100,00 |        |        |
|     |                                |                                | 900 | 100,00 |        |        |        |        | 0,20   |        | 99,80  |
| 301 | A(99,93)<br>V(0,07)            | A(99,83)<br>V(0,17)            | 901 |        |        | 100,00 |        |        |        | 100,00 |        |
|     |                                |                                | 902 |        | 99,93  |        | 0,07   |        | 99,83  |        | 0,17   |
|     |                                |                                | 903 | 100,00 |        |        |        | 99,71  |        | 0,29   |        |
| 302 | A(99,92)<br>V(0,08)            | A(100,00)                      | 904 |        |        | 100,00 |        |        |        | 100,00 |        |
|     |                                |                                | 905 |        | 99,92  |        | 0,08   |        | 100,00 |        |        |
|     |                                |                                | 906 |        | 100,00 |        |        |        | 100,00 |        |        |
| 303 | C(99,91)<br>Y(0,09)            | C(100,00)                      | 907 |        |        |        | 100,00 |        |        |        | 100,00 |
|     |                                |                                | 908 | 0,09   |        | 99,91  |        |        |        | 100,00 |        |
|     |                                |                                | 909 |        |        |        | 100,00 |        | 0,11   |        | 99,89  |
| 304 | R(99,90)<br>Q(0,10)            | R(100,00)                      | 910 |        | 100,00 |        |        |        | 100,00 |        |        |
|     |                                |                                | 911 | 0,10   |        | 99,90  |        |        |        | 100,00 |        |
|     |                                |                                | 912 | 97,64  |        | 2,36   |        | 100,00 |        |        |        |
| 305 | A(100,00)                      | A(100,00)                      | 913 |        |        | 100,00 |        |        |        | 100,00 |        |
|     |                                |                                | 914 |        | 100,00 |        |        |        | 100,00 |        |        |
|     |                                |                                | 915 |        | 100,00 |        |        |        | 0,12   |        | 99,88  |
| 306 | A(100,00)                      | A(99,90)<br>V(0,10)            | 916 |        |        | 100,00 |        |        |        | 100,00 |        |
|     |                                |                                | 917 |        | 100,00 |        |        |        | 99,90  |        | 0,10   |
|     |                                |                                | 918 | 100,00 |        |        |        | 100,00 |        |        |        |
| 307 | G(100,00)                      | K(100,00)                      | 919 |        |        | 100,00 |        | 100,00 |        |        |        |
|     |                                |                                | 920 |        |        | 100,00 |        | 100,00 |        |        |        |
|     |                                |                                | 921 |        |        | 100,00 |        |        |        | 100,00 |        |
| 308 | L(100,00)                      | L(100,00)                      | 922 |        | 100,00 |        |        |        | 100,00 |        |        |
|     |                                |                                | 923 |        |        |        | 100,00 |        |        |        | 100,00 |
|     |                                |                                | 924 |        | 100,00 |        |        |        | 100,00 |        |        |
| 309 | R(100,00)                      | Q(99,95)<br>*(0,05)            | 925 |        | 100,00 |        |        |        | 99,95  |        | 0,05   |
|     |                                |                                | 926 |        |        | 100,00 |        | 100,00 |        |        |        |
|     |                                |                                | 927 |        |        | 100,00 |        |        |        | 100,00 |        |
| 310 | D(100,00)                      | D(100,00)                      | 928 |        |        | 100,00 |        |        |        | 100,00 |        |
|     |                                |                                | 929 | 100,00 |        |        |        | 100,00 |        |        |        |
|     |                                |                                | 930 |        | 98,61  |        | 1,39   |        | 0,08   |        | 99,92  |
| 311 | R(0,06)<br>C(99,94)            | R(0,11)<br>C(99,82)<br>Y(0,07) | 931 |        | 0,06   |        | 99,94  |        | 0,11   |        | 99,89  |
|     |                                |                                | 932 |        |        | 100,00 |        | 0,07   |        | 99,93  |        |
|     |                                |                                | 933 |        | 100,00 |        |        |        | 99,95  |        | 0,05   |
| 312 | A(0,23)<br>T(99,77)            | A(0,09)<br>T(99,91)            | 934 | 99,77  |        | 0,23   |        | 99,91  |        | 0,09   |        |
|     |                                |                                | 935 |        | 100,00 |        |        |        | 100,00 |        |        |
|     |                                |                                | 936 |        | 99,96  |        | 0,04   |        |        | 100,00 |        |
| 313 | M(100,00)                      | I(0,05)<br>M(99,75)<br>T(0,20) | 937 | 100,00 |        |        |        | 100,00 |        |        |        |
|     |                                |                                | 938 |        |        |        | 100,00 |        | 0,20   |        | 99,80  |
|     |                                |                                | 939 |        |        | 100,00 |        | 0,05   |        | 99,95  |        |
| 314 | L(100,00)                      | L(100,00)                      | 940 |        | 100,00 |        |        |        | 100,00 |        |        |
|     |                                |                                | 941 |        |        |        | 100,00 |        |        |        | 100,00 |
|     |                                |                                | 942 |        | 99,93  |        | 0,07   |        | 100,00 |        |        |
| 315 | V(100,00)                      | A(0,10)<br>V(99,90)            | 943 |        |        | 100,00 |        |        |        | 100,00 |        |
|     |                                |                                | 944 |        |        |        | 100,00 |        | 0,10   |        | 99,90  |
|     |                                |                                | 945 |        |        | 100,00 |        | 0,05   |        | 99,89  |        |
| 316 | R(0,22)<br>C(99,72)<br>Y(0,06) | R(0,11)<br>C(99,84)<br>X(0,06) | 946 |        | 0,22   |        | 99,78  |        | 0,11   |        | 99,84  |
|     |                                |                                | 947 | 0,06   |        | 99,94  |        |        |        | 100,00 |        |
|     |                                |                                | 948 |        | 0,25   |        | 99,75  |        | 99,70  |        | 0,30   |
| 317 | G(99,57)<br>S(0,43)            | G(100,00)                      | 949 | 0,43   |        | 99,57  |        |        |        | 100,00 |        |
|     |                                |                                | 950 |        |        | 100,00 |        |        |        | 100,00 |        |
|     |                                |                                | 951 |        | 99,91  |        | 0,09   | 100,00 |        |        |        |
| 318 | D(100,00)                      | D(99,84)<br>G(0,16)            | 952 |        |        | 100,00 |        |        |        | 100,00 |        |
|     |                                |                                | 953 | 100,00 |        |        |        | 99,84  |        | 0,16   |        |
|     |                                |                                | 954 |        | 99,90  |        | 0,10   |        | 99,93  |        | 0,07   |
| 319 | D(100,00)                      | D(100,00)                      | 955 |        |        | 100,00 |        |        |        | 100,00 |        |
|     |                                |                                | 956 | 100,00 |        |        |        | 100,00 |        |        |        |
|     |                                |                                | 957 |        | 100,00 |        |        |        | 100,00 |        |        |
| 320 |                                | L(100,00)                      | 958 |        |        |        | 100,00 |        | 100,00 |        |        |

|     |                                |                                |                      |        |        |                  |                 |                  |                 |                  |                |
|-----|--------------------------------|--------------------------------|----------------------|--------|--------|------------------|-----------------|------------------|-----------------|------------------|----------------|
|     | L(99,88)S(0,12)                |                                | 959                  |        | 0,12   |                  | 99,88           |                  |                 |                  | 100,00         |
|     |                                |                                | 960                  | 100,00 |        |                  |                 |                  | 1,49            |                  | 98,51          |
| 321 | V(100,00)                      | A(0,18)<br>V(99,82)            | 961<br>962<br>963    |        |        | 100,00           | 100,00          |                  | 0,18<br>99,95   | 100,00           | 99,82<br>0,05  |
| 322 | A(0,12)<br>V(99,88)            | A(0,15)<br>V(99,85)            | 964<br>965<br>966    |        | 0,12   | 100,00           | 99,88<br>100,00 |                  | 0,15<br>0,08    | 100,00           | 99,85<br>99,92 |
| 323 | I( 99,88)<br>V(0,12)           | I(99,87)<br>T(0,13)            | 967<br>968<br>969    | 99,88  |        | 0,12             | 100,00          | 100,00           | 0,13<br>99,92   |                  | 99,87<br>0,08  |
| 324 | R(0,19)<br>C(99,81)<br>V(0,11) | R(0,18)<br>C(99,77)<br>Y(0,05) | 970<br>971<br>972    |        | 0,19   | 100,00           | 99,81<br>100,00 | 0,05             | 0,18<br>0,14    | 99,95            | 99,82<br>99,86 |
| 325 | E(99,66)<br>X(0,34)            | E(99,44)<br>K(0,11)<br>X(0,46) | 973<br>974<br>975    | 99,66  |        | 99,66<br>100,00  |                 | 0,11<br>99,54    |                 | 99,44<br>100,00  |                |
| 326 | S(100,00)                      | S(100,00)                      | 976<br>977<br>978    | 100,00 |        | 100,00           | 100,00          | 100,00           | 100,00          | 100,00           |                |
| 327 | Q(99,97)<br>L(0,03)            | A(97,83)<br>V(2,17)            | 979<br>980<br>981    | 99,97  | 100,00 |                  | 0,03            |                  | 97,83           | 100,00           | 2,17           |
| 328 | G(100,00)                      | G(100,00)                      | 982<br>983<br>984    |        |        | 100,00<br>100,00 |                 | 100,00           |                 | 100,00<br>100,00 |                |
| 329 | V(100,00)                      | T(100,00)                      | 985<br>986<br>987    |        |        | 100,00           | 100,00          | 100,00           | 100,00<br>99,95 |                  | 0,05           |
| 330 | Q(100,00)                      | R(0,09)<br>Q(99,91)            | 988<br>989<br>990    | 100,00 | 100,00 |                  |                 | 99,91<br>100,00  | 100,00          | 0,09             |                |
| 331 | E(100,00)                      | E(100,00)                      | 991<br>992<br>993    | 100,00 |        | 100,00           |                 | 100,00           |                 | 100,00           |                |
| 332 | D(100,00)                      | D(100,00)                      | 994<br>995<br>996    | 100,00 |        | 100,00           |                 | 100,00           | 100,00          | 100,00           |                |
| 333 | A(99,92)<br>T(0,08)            | K(100,00)                      | 997<br>998<br>999    | 0,08   | 100,00 | 99,92<br>100,00  |                 | 100,00<br>100,00 |                 | 100,00           |                |
| 334 | A(100,00)                      | A(99,94)<br>T(0,06)            | 1000<br>1001<br>1002 |        | 100,00 | 100,00           |                 | 0,06<br>0,06     | 100,00          | 99,94<br>99,94   |                |
