# Supplementary material for: Late Relapse and Reinfection in HCV Patients Treated with Direct-Acting Antiviral (DAA) Drugs
Source: Viruses. 2021 Jun 16;13(6):1151. doi: 10.3390/v13061151 (PMC8235384; doi:10.3390/v13061151)
Supplement: Supplementary file 1 [file viruses-13-01151-s001.zip]

Archive with 14 entries (14 files):
- Minosse et al_Figure S1.pdf
- Minosse et al_Figure S2.pdf
- Minosse et al_Figure S3.pdf
- Minosse et al_Figure S4.pdf
- Minosse et al_Figure S5.pdf
- Minosse et al_Figure S6.pdf
- Minosse et al_Figure S7.pdf
- Minosse et al_Legends suppl figures.pdf
- Minosse et al_Table S1.pdf
- Minosse et al_Table S2.pdf
- Minosse et al_Table S3.pdf
- Minosse et al_Table S4.pdf
- Minosse et al_Table S5.pdf
- Minosse et al_Table S6.pdf
