# Supplementary figures and images for: Late Relapse and Reinfection in HCV Patients Treated with Direct-Acting Antiviral (DAA) Drugs
Source: MDPI journal article supplement (doi:10.3390/v13061151), 2021-06-16

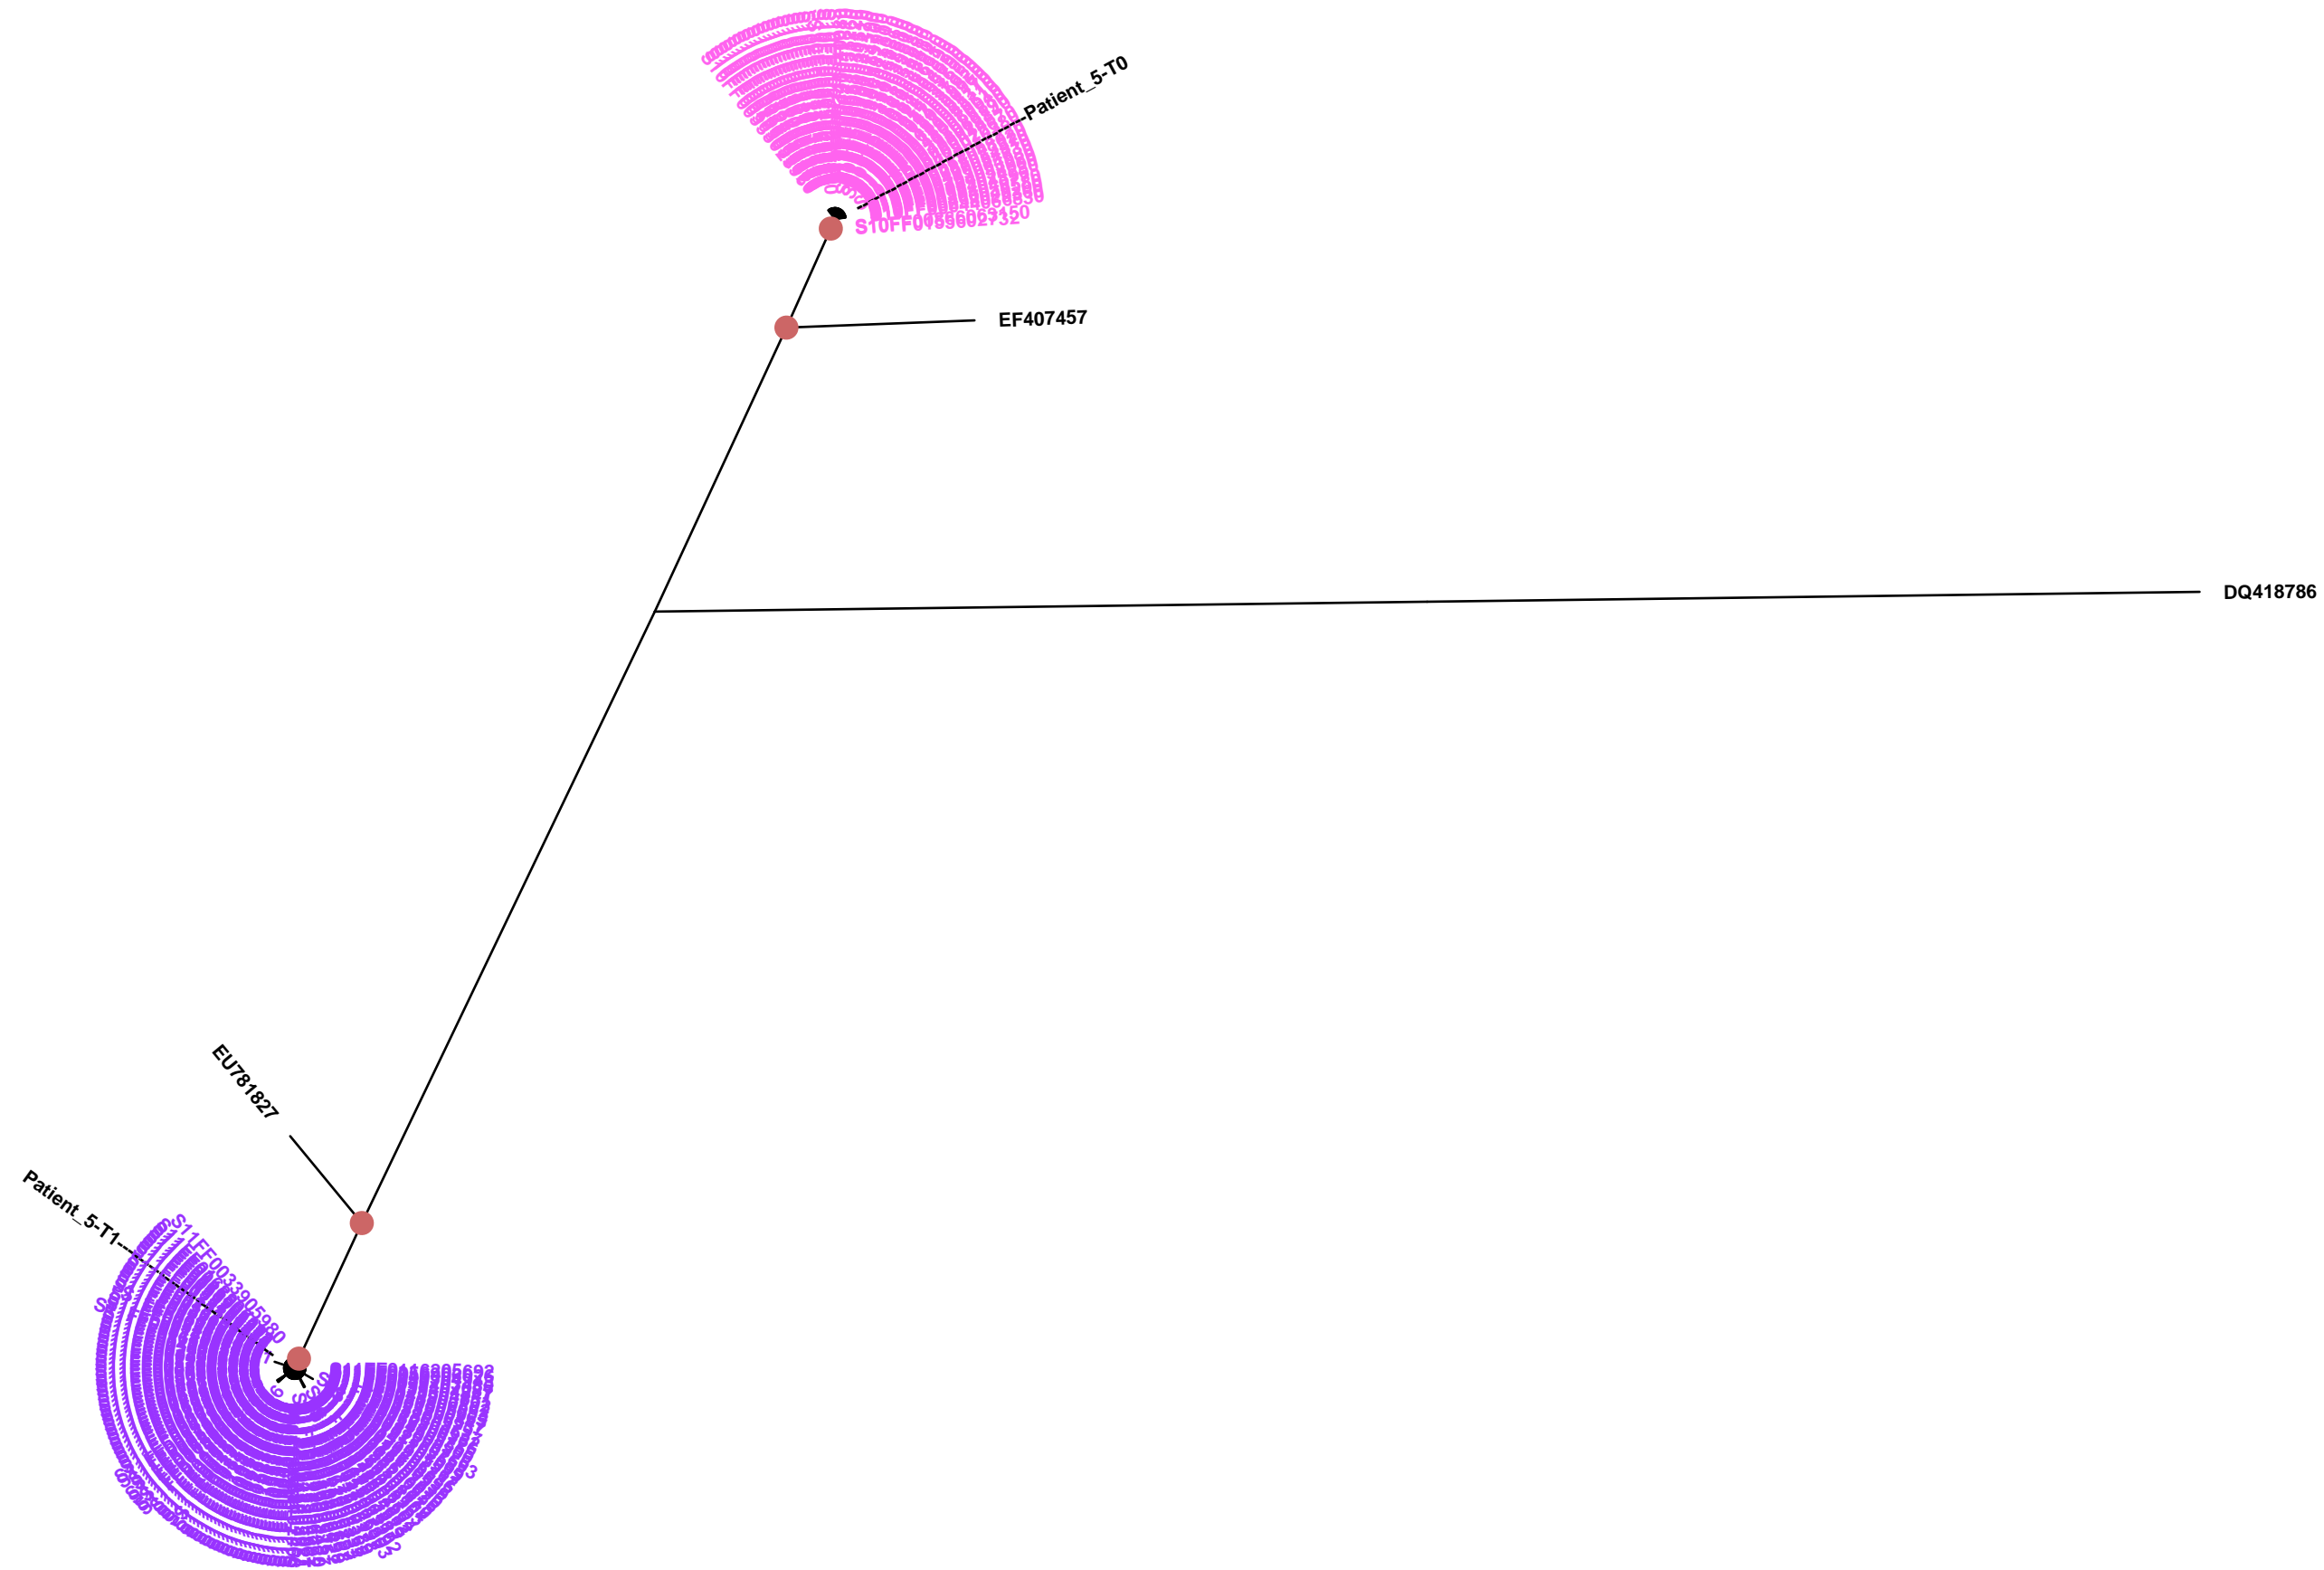

Supplement: s1 [file s1]

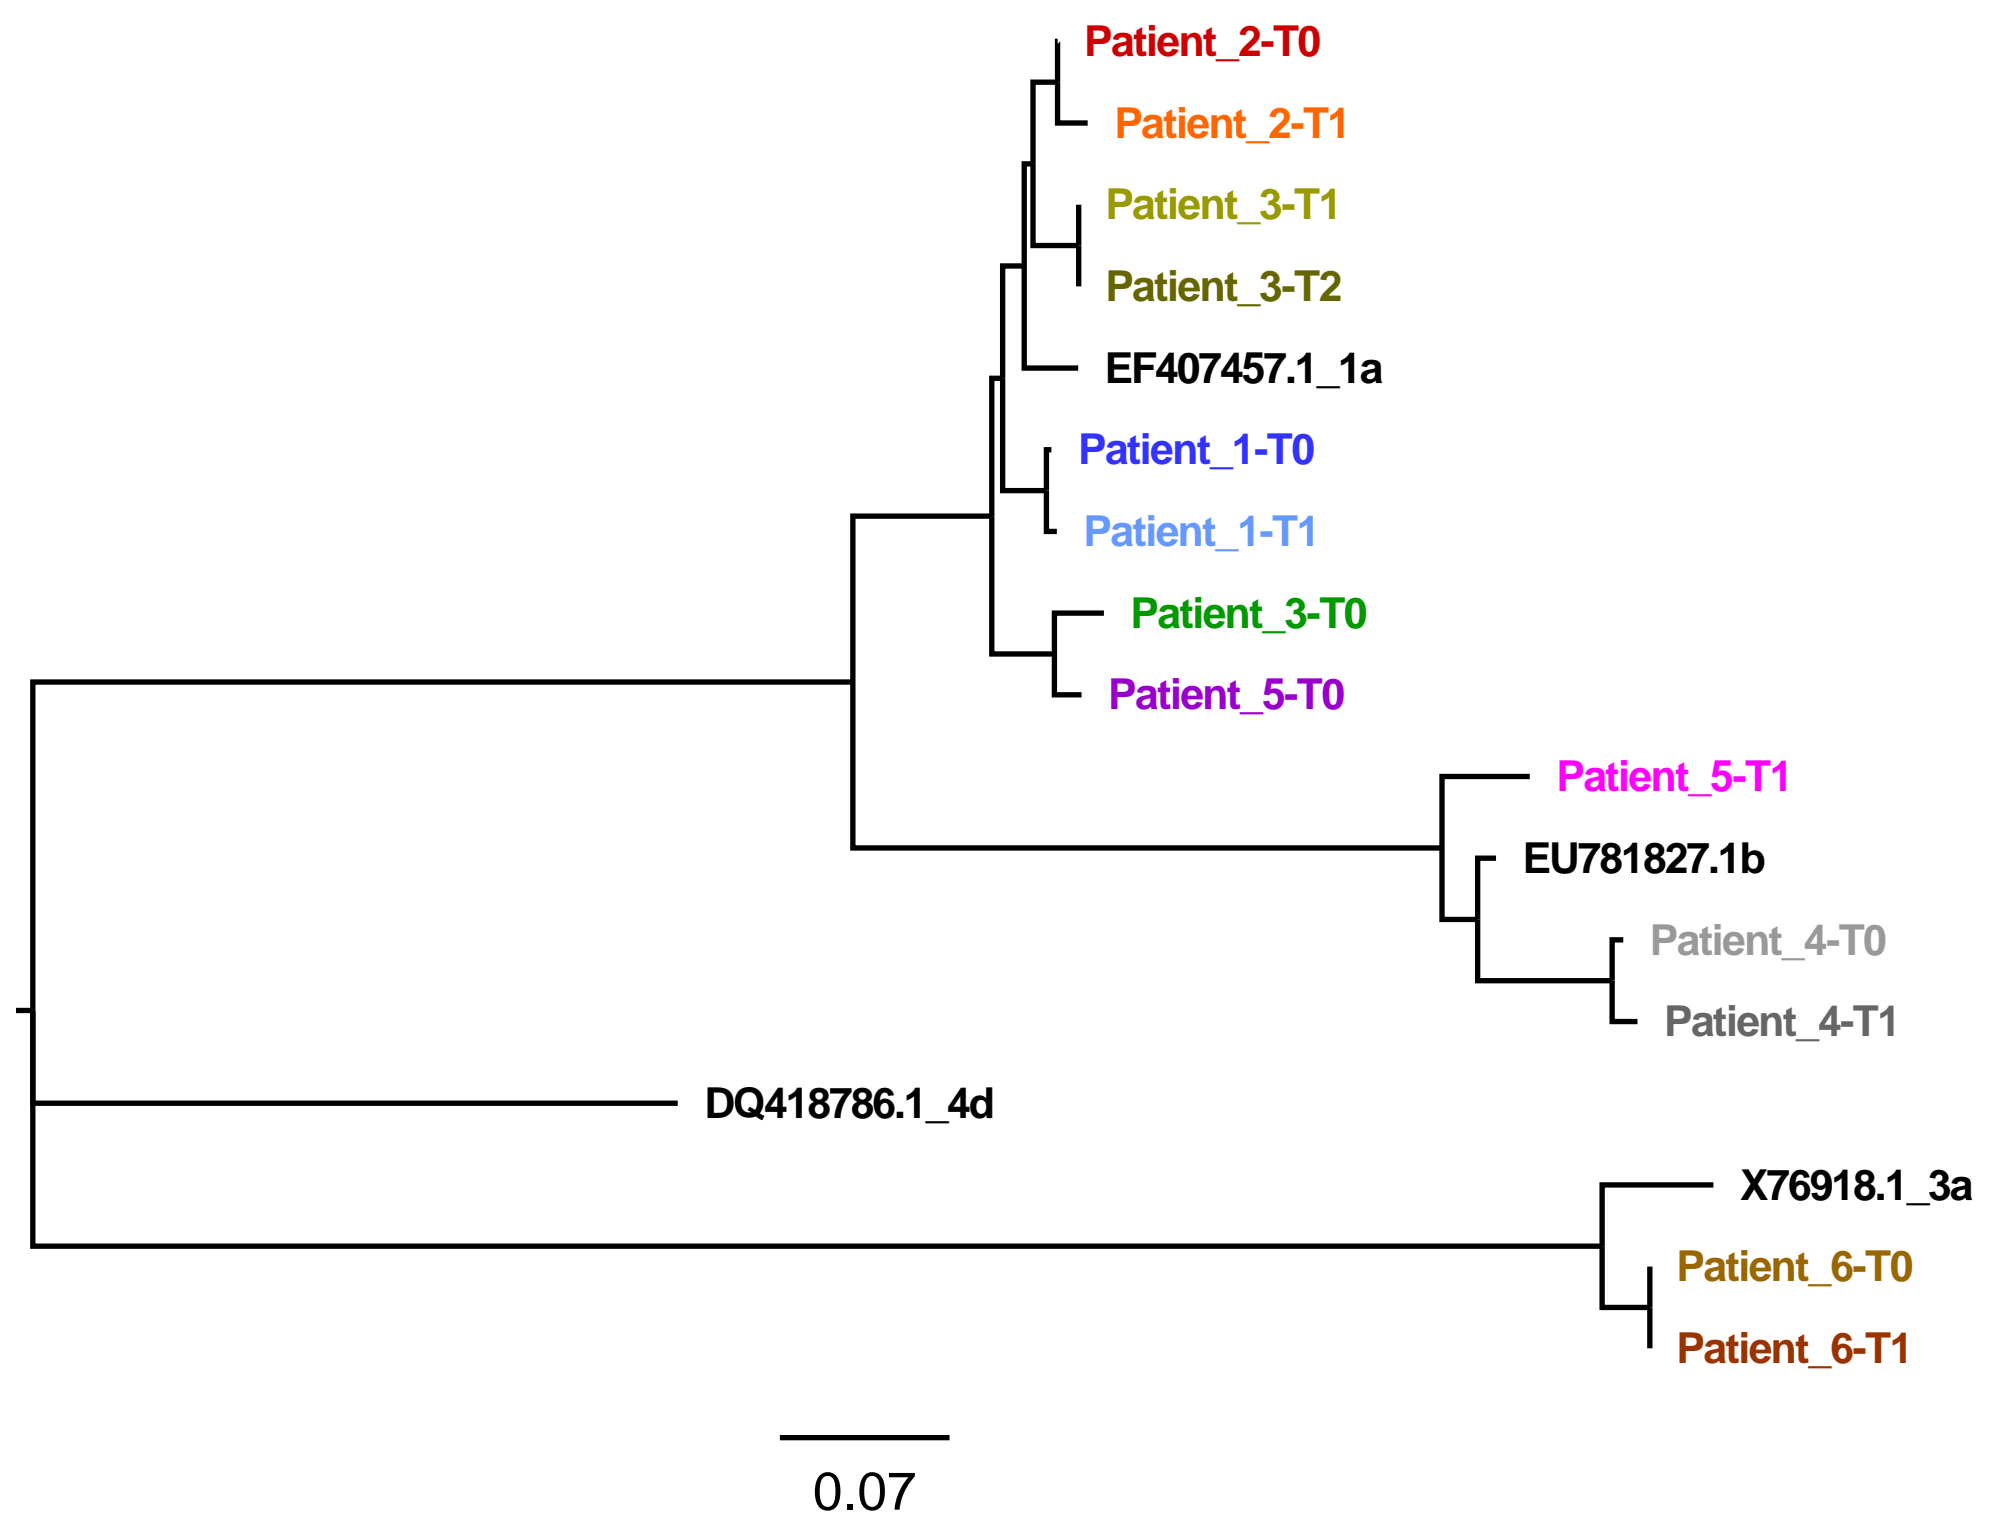

Supplement: s1 [file s1]

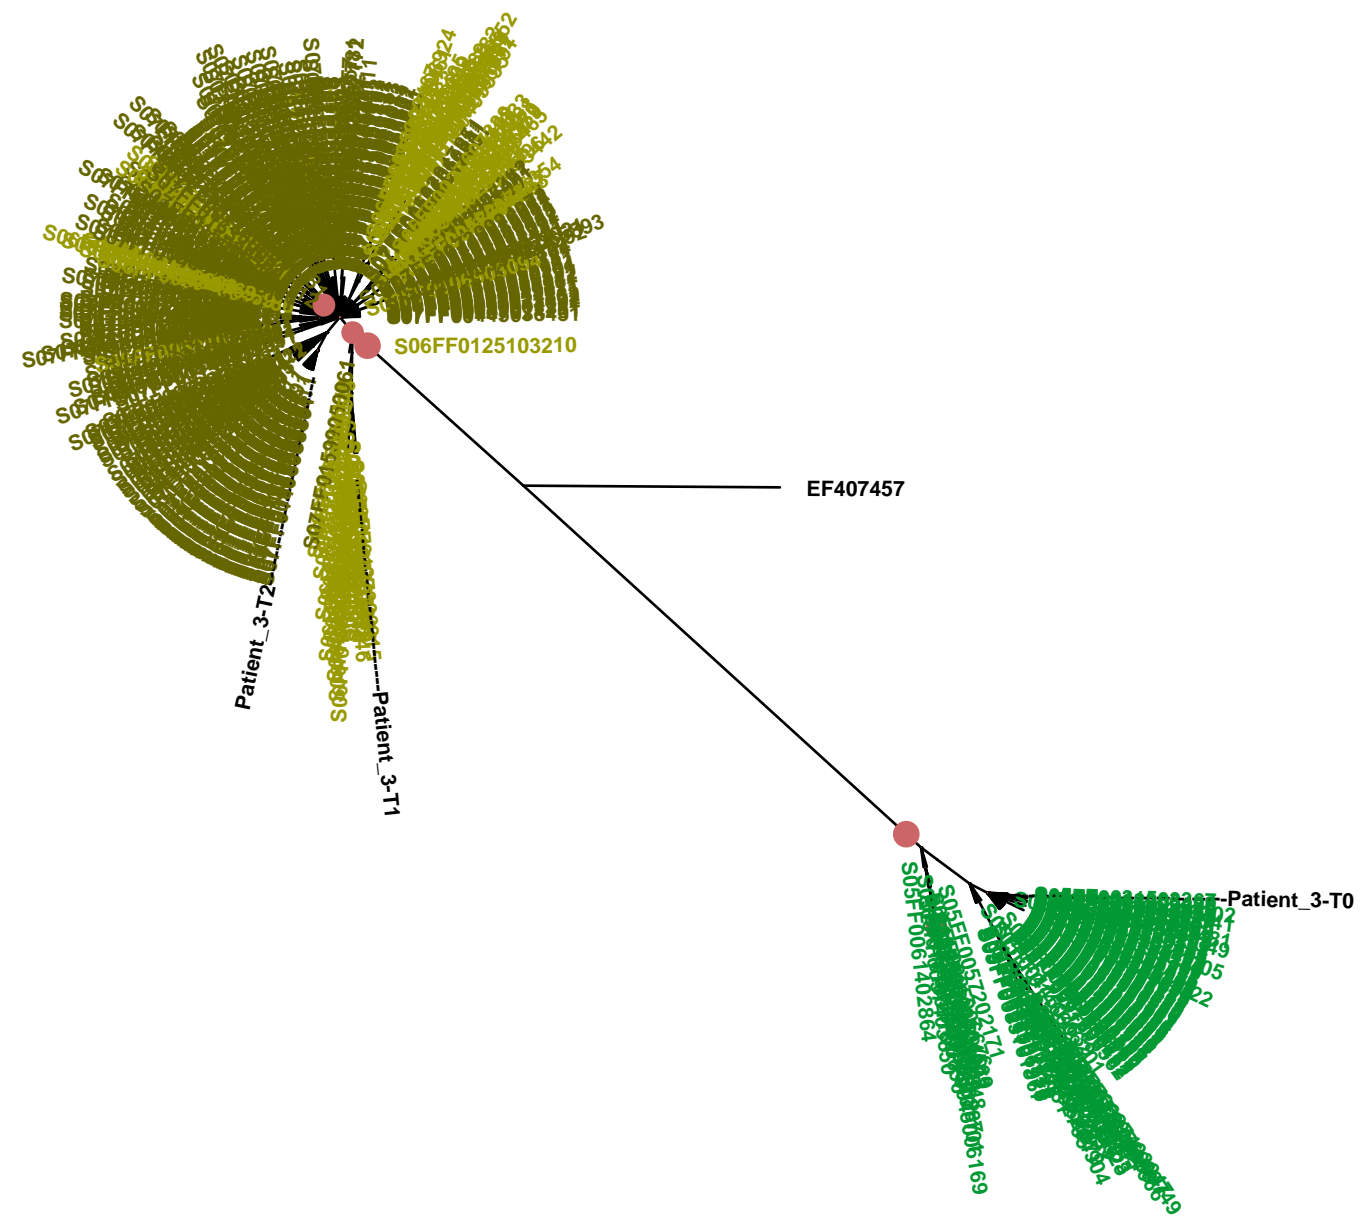

0.009

Supplement: s1 [file s1]

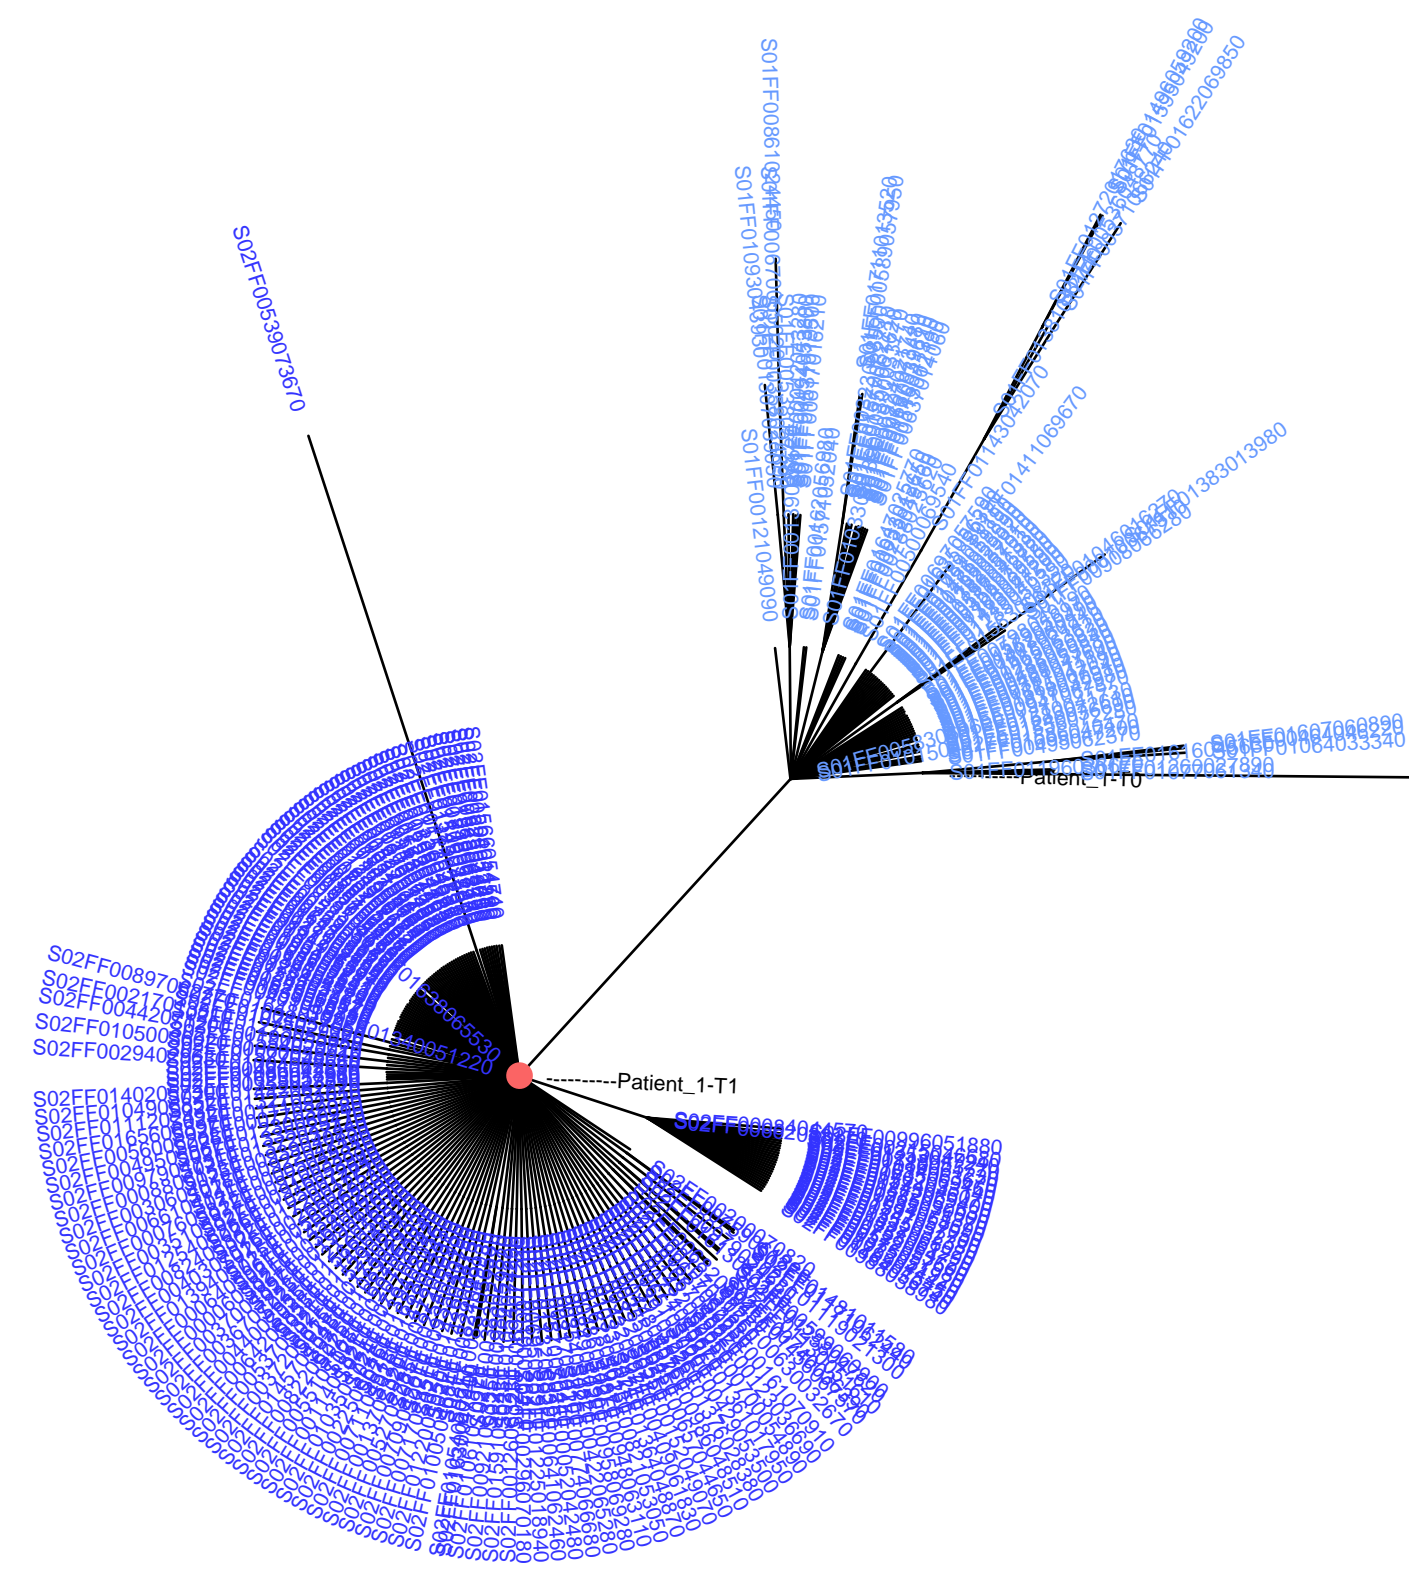

EF407457

Supplement: s1 [file s1]

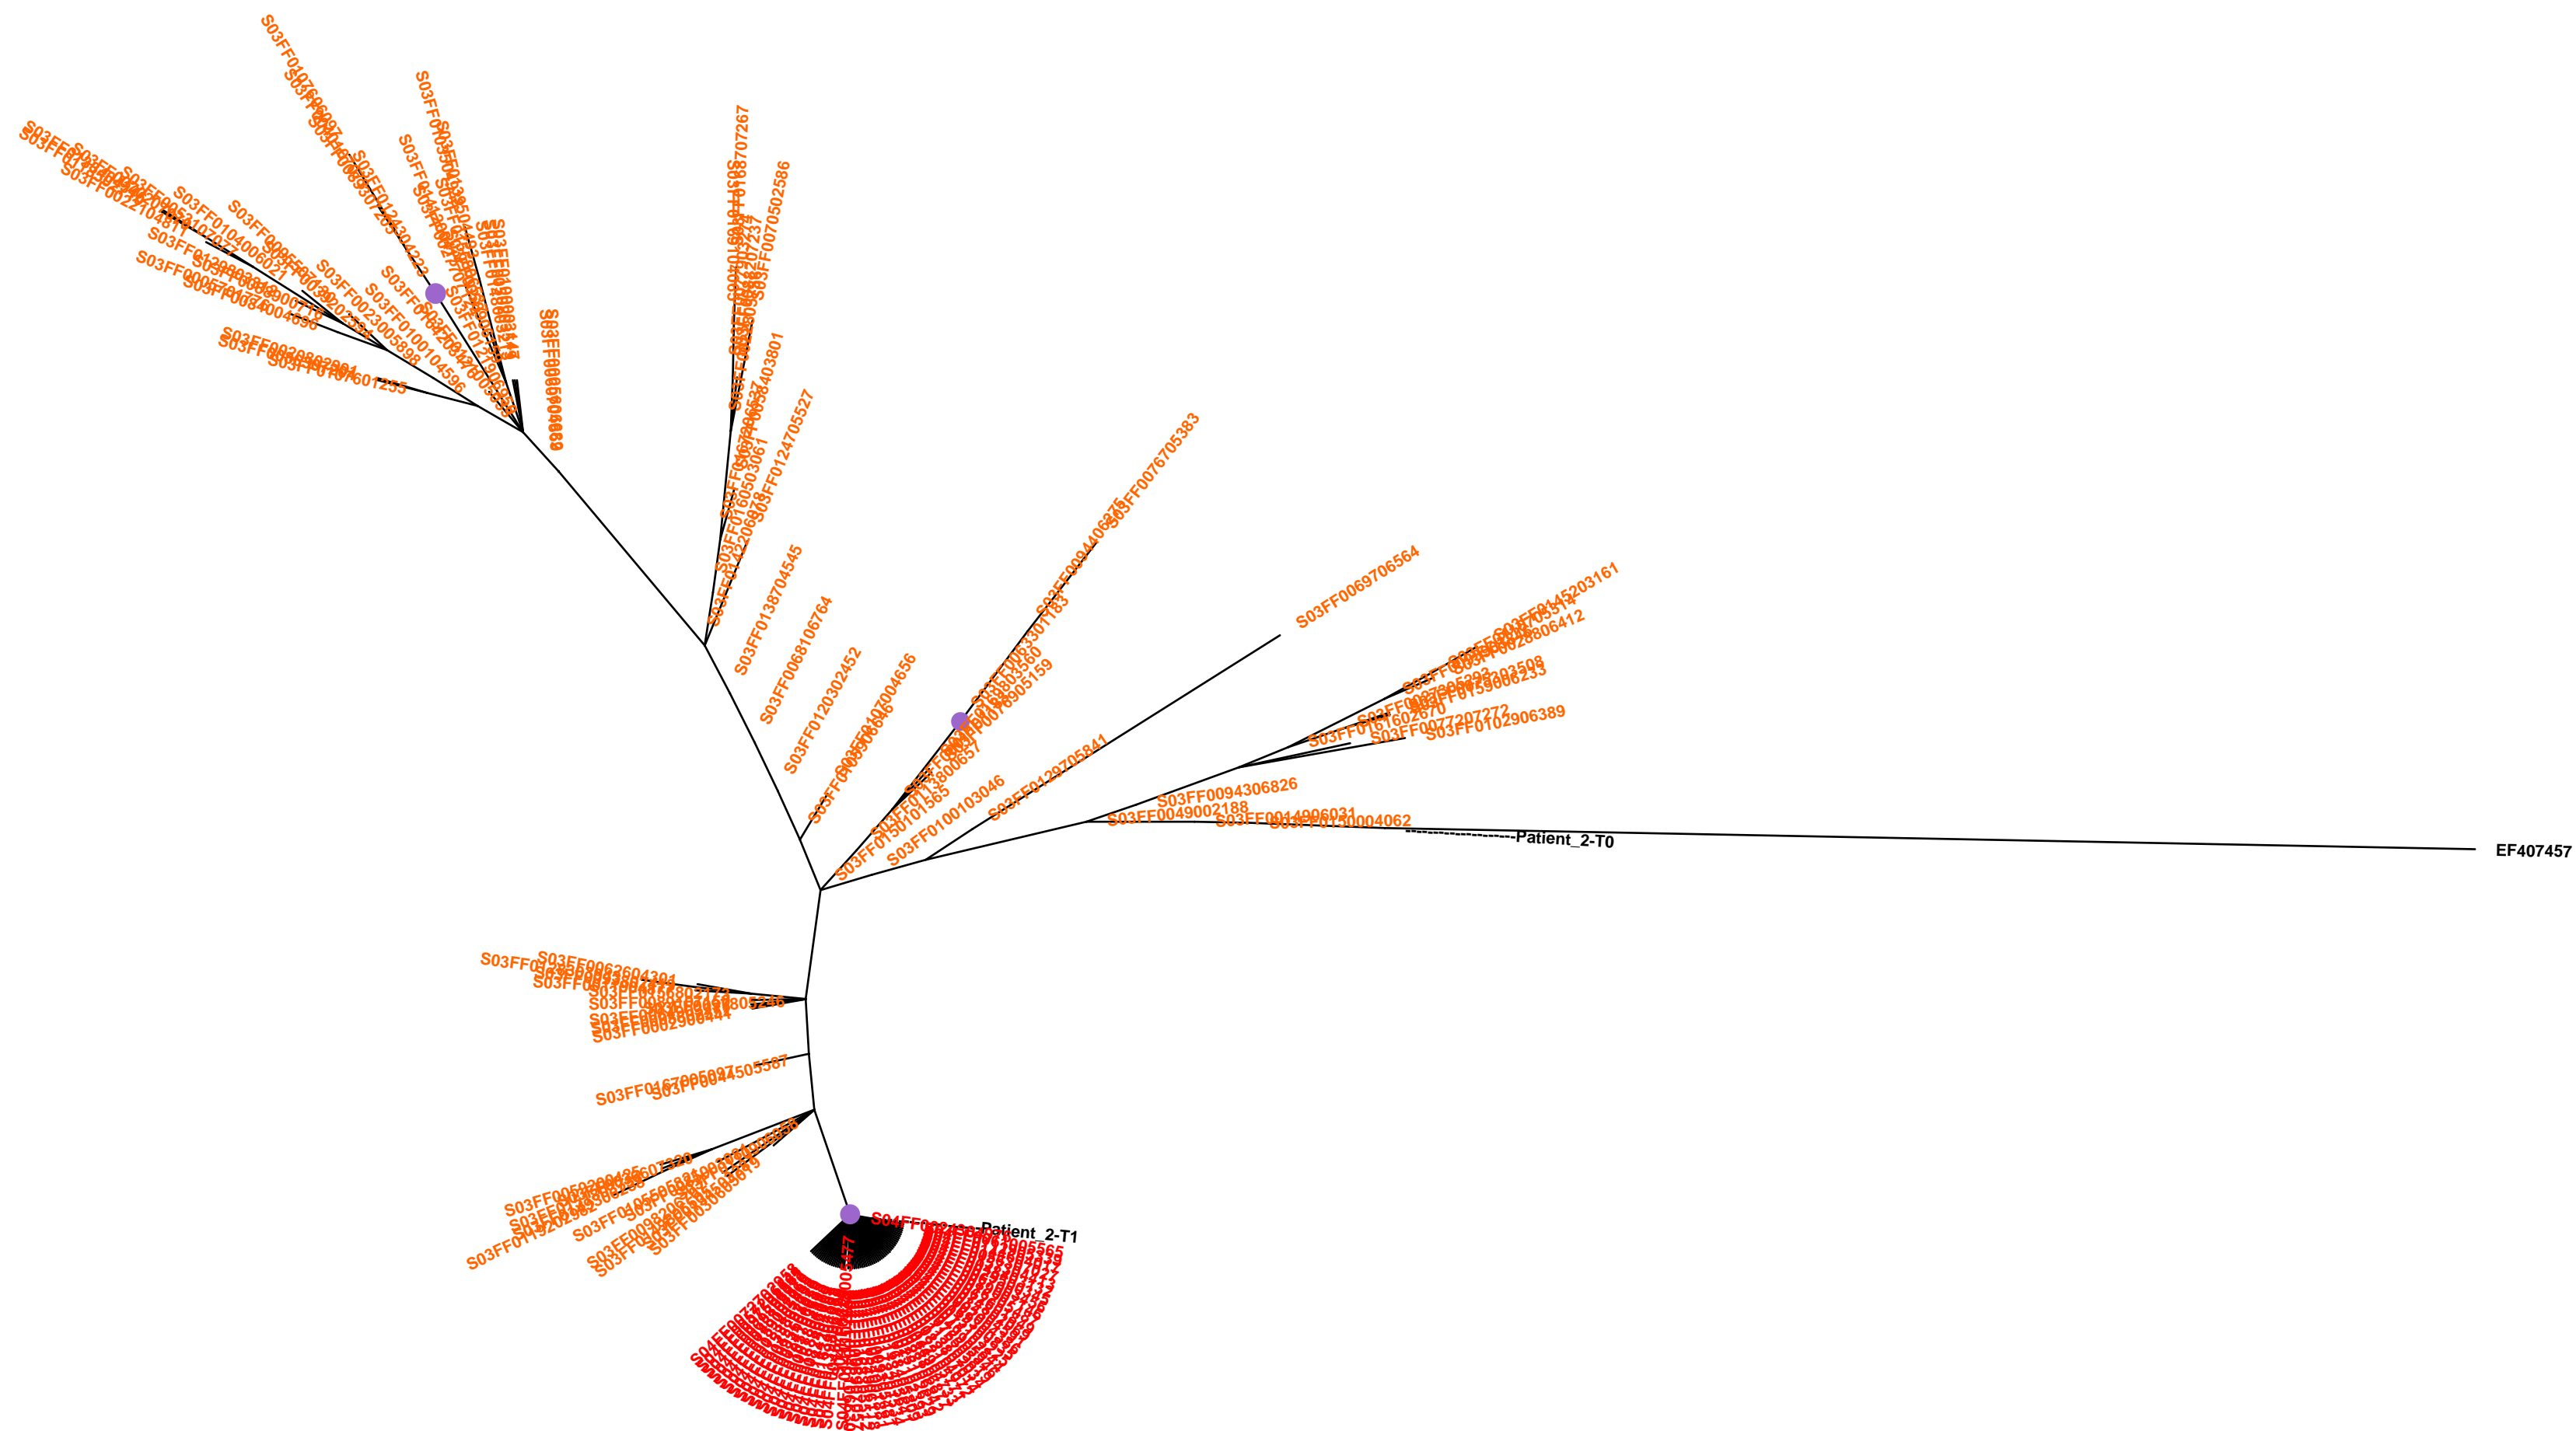

0.007

Supplement: s1 [file s1]
